# Statistical learning of successor representations is related to on-task replay

Lennart Wittkuhn<sup>1,2,\*</sup>, Lena M. Krippner<sup>1,3</sup> & Nicolas W. Schuck<sup>1,2,\*</sup>

<sup>1</sup>Max Planck Research Group NeuroCode, Max Planck Institute for Human Development, Berlin, Germany

<sup>2</sup>Max Planck UCL Centre for Computational Psychiatry and Ageing Research, Berlin, Germany  
Lentzeallee 94, D-14195 Berlin, Germany

<sup>3</sup>Harding Center for Risk Literacy, University of Potsdam, Faculty of Health Sciences, Potsdam, Germany  
Virchowstraße 2-4, D-14482 Potsdam, Germany

\*Correspondence to

[wittkuhn@mpib-berlin.mpg.de](mailto:wittkuhn@mpib-berlin.mpg.de) (ORCID: 0000-0003-2966-6888)

[schuck@mpib-berlin.mpg.de](mailto:schuck@mpib-berlin.mpg.de) (ORCID: 0000-0002-0150-8776)

## Abstract

Humans automatically infer higher-order relationships between events in the environment from their statistical co-occurrence, often without conscious awareness. Neural replay of task representations, which has been described as sampling from a learned transition structure of the environment, is a candidate mechanism by which the brain could use or even learn such relational information in the service of adaptive behavior. Human participants viewed sequences of images that followed probabilistic transitions determined by ring-like graph structures. Behavioral modeling revealed that participants acquired multi-step transition knowledge through gradual updating of an internal successor representation (SR) model, although half of participants did not indicate any knowledge about the sequential task structure. To investigate neural replay, we analyzed dynamics of multivariate functional magnetic resonance imaging (fMRI) patterns during short pauses from the ongoing statistical learning task. Evidence for sequential replay consistent with the probabilistic task structure was found in occipito-temporal and sensorimotor cortices during short on-task intervals. These findings indicate that implicit learning of higher-order relationships establishes an internal SR-based map of the task, and is accompanied by cortical on-task replay.

## 27 Introduction

28 The representation of structural knowledge in the brain in form of a so-called *cognitive map* has been  
29 a topic of great interest. A common assumption is that a cognitive map provides the basis for flexible  
30 learning, inference, and generalization (Tolman, 1948; Wilson et al., 2014; Schuck et al., 2016; Behrens  
31 et al., 2018), and yet is based on individual experiences that provide structural information only  
32 indirectly (Schapiro et al., 2013; Garvert et al., 2017). The brain must therefore extract statistical  
33 regularities from continuous experiences, and then use these regularities as the starting point for the  
34 formation of abstract, map-like knowledge. A mechanism through which abstract knowledge could  
35 be used to generate flexible behavior is on-task replay (e.g., Sutton, 1991; Kurth-Nelson et al., 2016),  
36 the rapid reactivation of trajectories simulated from an internal cognitive map. In this paper, we  
37 investigated whether on-task replay of cognitive map-like knowledge occurs in the human brain while  
38 participants learn statistical regularities.

39 The extraction of statistical regularities from experience is known as *statistical learning* (Schapiro  
40 and Turk-Browne, 2015; Garvert et al., 2017; Sherman et al., 2020). Statistical learning is automatic  
41 and incidental, as it occurs without any instructions or premeditated intention to learn, and often leads  
42 to implicit knowledge that is not consciously accessible (Reber, 1989; Seger, 1994; Turk-Browne et al.,  
43 2005). This contrasts with research on cognitive maps and planning that often relies on instruction-  
44 based task knowledge (e.g., Schuck et al., 2016; Constantinescu et al., 2016; Kurth-Nelson et al.,  
45 2016). In a statistical learning setting, relationships between events are typically described by pairwise  
46 transition probabilities (i.e., the probability that  $A$  is followed by  $B$ ) to which humans show great  
47 sensitivity from an early age on (Saffran et al., 1996). Intriguingly, many experiments have shown that  
48 humans extract higher-order relational structures among individual events that go beyond pairwise  
49 transition probabilities (for reviews, see e.g., Karuza et al., 2016; Lynn and Bassett, 2020). This  
50 includes knowledge about ordinal and hierarchical information that structures individual subsequences  
51 (Schuck et al., 2012a,b; Solway et al., 2014; Balaguer et al., 2016), graph topological aspects such as  
52 bottlenecks and community structure (Schapiro et al., 2013; Karuza et al., 2017; Kahn et al., 2018),  
53 and macro-scale aspects of graph structures (Lynn et al., 2020a,b).

54 A main benefit of abstracted knowledge in the context of transition structures is that it allows to  
55 plan multi-step sequences (Miller and Venditto, 2021; Hunt et al., 2021). Specifically, while experienced  
56 transition structure can be used to learn about the probability that a given event will be followed by a  
57 specific other event, it can also be used to compute long-term visitation probabilities, i.e., which events  
58 can be expected over a given future horizon. This idea is formalized in the successor representation  
59 (SR) (Dayan, 1993), a predictive map that reflects the (discounted) expected visitations of future events  
60 (Garvert et al., 2017; Bellmund et al., 2020; Brunec and Momennejad, 2021; Russek et al., 2021), and  
61 can be learned from the experience of individual transitions. Critically, the predictive horizon of the  
62 SR depends on a discount parameter  $\gamma$  which determines how far into the future upcoming states are  
63 considered (Momennejad and Howard, 2018; Momennejad, 2020). One goal of our study was therefore  
64 to investigate whether statistical learning leads to knowledge of expected future visitations over a  
65 predictive horizon, as required for mental planning.

66 The second main interest of our study was to understand whether abstract knowledge derived from  
67 statistical learning would be reflected in on-task replay. Replay is characterized by the fast sequential  
68 reactivation of neural representations that reflect previously experienced transition structure (see e.g.,  
69 Wikenheiser and Redish, 2015a; Schuck and Niv, 2019; Wittkuhn et al., 2021; Yu et al., 2021). Replay  
70 occurs in hippocampal but also cortical brain areas (Ji and Wilson, 2006; Wittkuhn and Schuck, 2021)

71 and has been observed during short pauses from the ongoing task in rodents (Johnson and Redish,  
72 2007; Carr et al., 2011) as well as humans (Kurth-Nelson et al., 2016; Tambini and Davachi, 2019).  
73 Sequential reactivation observed during brief pauses is often referred to as *online* or *on-task* replay,  
74 and likely reflects planning of upcoming choices (Kurth-Nelson et al., 2016; Eldar et al., 2020).

75 Previous studies have shown that expectations about upcoming visual stimuli elicit neural signals  
76 that are very similar to those during actual perception (Kok et al., 2012, 2014; Hindy et al., 2016;  
77 Kok and Turk-Browne, 2018) and anticipatory activation sequences have been found in visual cortex  
78 following perceptual sequence learning (Xu et al., 2012; Eagleman and Dragoi, 2012; Gavornik and  
79 Bear, 2014; Ekman et al., 2017). It remains unknown, however, whether on-task replay mirrors  
80 predictive knowledge that is stored in SR-based cognitive maps. In addition, while most research has  
81 focused on hippocampal reactivation, the above evidence suggests that statistical knowledge is also  
82 reflected in sensory and motor brain areas.

83 In the present study, we therefore examined whether on-task neural replay in visual and motor  
84 cortex reflects anticipation of sequentially structured stimuli in an automatic and incidental statisti-  
85 cal learning context. This may elucidate if (non-hippocampal) neural replay during on-task pauses  
86 contributes to learning of probabilistic cognitive maps. To this end, participants performed an in-  
87 cidental statistical learning paradigm (cf. Schapiro et al., 2012; Lynn et al., 2020a) in which visual  
88 presentation order and motor responses followed statistical regularities that were determined by a  
89 ring-like graph structure. The nature of the graph structure allowed us to dissociate knowledge about  
90 individual transition probabilities from an SR-based cognitive map that entails long-term visitation  
91 probabilities. Moreover, the transition probabilities among the task stimuli changed halfway through  
92 the experiment without prior announcement, which allowed us to understand the dynamical updating  
93 of task knowledge and replay within the same participants.

## 94 Results

95 Thirty-nine human participants took part in an fMRI experiment over two sessions. Participants  
96 were first informed that the experiment involves six images of animals (cf. Snodgrass and Vanderwart,  
97 1980; Rossion and Pourtois, 2004) and six response buttons mapped onto their index, middle, and  
98 ring fingers of both hands. Participants then began the first session of magnetic resonance imaging  
99 (MRI), during which they learned the stimulus-response (S-R) mappings between images and response  
100 buttons through feedback (*recall trials*, Fig. 1a, 8 runs with 60 trials each, 480 trials in total). In recall  
101 trials, animal images were shown without any particular sequential order, i.e., all pairwise sequential  
102 orderings of the images were presented equally often per run. Participants had to press the correct  
103 button in response to briefly presented images (500 milliseconds (ms)) during a response window (800  
104 ms; jittered stimulus-response interval (SRI) of 2500 ms on average). If the response was incorrect,  
105 a feedback about the correct button was provided (500 ms; no feedback on correct trials). The trial  
106 ended with a jittered inter-trial interval (ITI) of 2500 ms on average.

107 The second session started with one additional run of recall trials that was followed by five runs  
108 of *graph trials* (Fig. 1b, 240 trials per run, 1200 trials in total). As before, participants had to press  
109 the correct button in response to each animal. Images were now presented in a faster pace (800 ms  
110 per image and 750 ms between images on average), and only on 10% of trials (120 graph trials in  
111 total per participant), ITIs were set to 10 seconds (s). Importantly, the order of the images now  
112 followed a probabilistic transition structure (see below), about which participants were not informed,

113 and no feedback was provided. At the end of the second session, participants completed a post-task  
 114 questionnaire assessing explicit sequence knowledge.

115 The sequential ordering of images during graph trials was determined by either a *unidirectional*  
 116 or *bidirectional* ring-like graph structure with probabilistic transitions (Fig. 2a–b; for details, see  
 117 Methods). In the unidirectional graph condition (Fig. 2a, middle, henceforth *uni*), each image had  
 118 one frequent transition to the clockwise neighboring node (probability of  $p_{ij} = 0.7$ ), never transitioned  
 119 to the counterclockwise neighbor ( $p_{ij} = 0.0$ ), and was followed occasionally by the three other nodes  
 120 ( $p_{ij} = 0.1$  each; Fig. 2b, left). In consequence, stimuli most commonly transitioned in clockwise order  
 121 along the ring shown in Fig. 2a. In the bidirectional graph condition (Fig. 2a, right, henceforth *bi*),  
 122 transitions to both neighboring nodes (clockwise and counterclockwise) were equally likely ( $p_{ij} = 0.35$ ),  
 123 and transitions to all other three nodes occurred with  $p_{ij} = 0.1$  (Fig. 2b, right), as in the unidirectional  
 124 graph. Every participant started the task in one of these conditions (*uni* or *bi*). Halfway through  
 125 the third run, transitions began to be governed by the alternative graph, such that all participants  
 126 experienced both graphs as well as the change between them (Fig. 2c). 12 participants started in the  
 127 unidirectional condition and transitioned to the bidirectional graph (*uni* – *bi*), while 27 participants  
 128 experienced the reverse order (*bi* – *uni*).

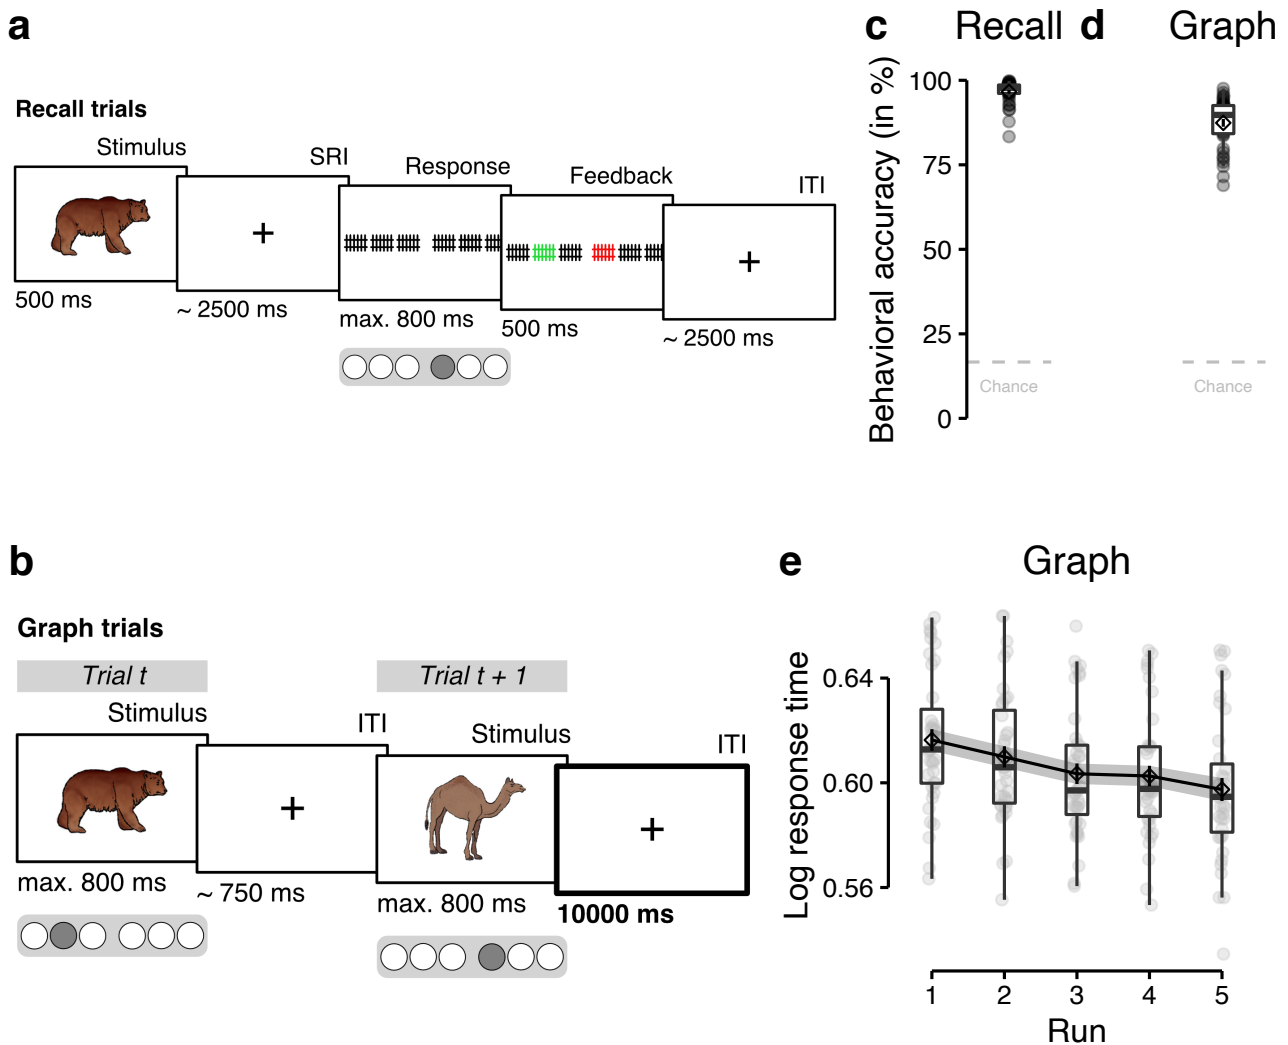

Figure 1: [see caption on the next page]

**Figure 1: Task design and stimulus-response learning.** (a) On recall trials, individual images were presented for 500 ms. Participants were instructed to press the correct response button associated with the stimulus during the response interval (time limit of 800 ms). Stimulus presentations and motor responses were separated by SRIs and ITIs which lasted 2.5 s on average (cf. Wittkuhn and Schuck, 2021). Feedback was only presented on incorrect trials. Classifiers were trained on fMRI data from correct recall trials only. (b) On graph trials, images were presented for 800 ms, separated by only 750 ms on average. Participants were asked to press the correct response button associated with the presented stimulus as quickly and accurately as possible within 800 ms. On 10% of trials, ITIs lasted 10 s (see ITI in trial  $t + 1$ ; highlighted by the thick border, for illustrative purposes only). Classifier trained on fMRI data from correct recall trials were applied to the eight TRs of the 10 s ITIs in graph trials to investigate task-related neural activation patterns during on-task pauses. (c) Mean behavioral accuracy (in %; y-axis) across all nine runs of the recall trials. (d) Mean behavioral accuracy (in %; y-axis) across all five runs of the graph trials. (e) Mean log response time (y-axis) per run (x-axis) in graph trials. Boxplots in (c), (d), and (e) indicate the median and interquartile range (IQR). The lower and upper hinges correspond to the first and third quartiles (the 25<sup>th</sup> and 75<sup>th</sup> percentiles). The upper whisker extends from the hinge to the largest value no further than 1.5\* IQR from the hinge (where IQR is the interquartile range (IQR), or distance between the first and third quartiles). The lower whisker extends from the hinge to the smallest value at most 1.5\* IQR of the hinge. The diamond shapes show the sample mean. Error bars in (c), (d) and shaded areas in (e) indicate  $\pm 1$  standard error of the mean (SEM). Each dot in (c), (d), and (e) corresponds to averaged data from one participant. All statistics have been derived from data of  $n = 39$  human participants who participated in one experiment. The stimulus material (individual images of a bear and a dromedary) shown in (a) and (b) were taken from a set of colored and shaded images commissioned by Rossion and Pourtois (2004), which are loosely based on images from the original Snodgrass and Vanderwart set (Snodgrass and Vanderwart, 1980). The images are freely available from the internet at <https://sites.google.com/andrew.cmu.edu/tarrlab/resources/tarrlab-stimuli> under the terms of the Creative Commons Attribution-NonCommercial-ShareAlike 3.0 Unported license (CC BY-NC-SA 3.0; for details, see <https://creativecommons.org/licenses/by-nc-sa/3.0/>). Stimulus images courtesy of Michael J. Tarr, Carnegie Mellon University, (for details, see <http://www.tarrlab.org/>).

## 129 Behavioral results

130 We first asked whether participants learned the stimulus-response (S-R) mapping sufficiently well.  
131 Behavioral accuracy on recall trials indeed surpassed chance-level (16.67%) in all runs ( $\bar{x} \geq 86.50\%$ ,  
132 CIs  $[\geq 80.79, +\infty]$ ,  $t_{38} \geq 20.62$ ,  $ps < 0.001$  (corrected),  $ds \geq 3.30$ ; Figs. 1c, S2b-c). Likewise, during  
133 graph trials, participants also performed above chance in all runs ( $\bar{x} \geq 85.12$ , CIs  $[\geq 82.55, +\infty]$ ,  
134  $t_{38} \geq 44.90$ ,  $ps < 0.001$  (corrected),  $ds \geq 7.19$ ; Figs. 1d, S2d), and improved with time (effect of run:  
135  $F_{1.00,38.00} = 7.96$ ,  $p = 0.008$ , Fig. S2d).

136 Next, we investigated sequential knowledge. Although participants were not informed that images  
137 followed a sequential structure during graph trials, we expected that incidental learning would allow  
138 them to anticipate upcoming stimuli during these trials, and thus respond faster with learning. A linear  
139 mixed effects (LME) model that tested the effect of task run on response times was broadly in line  
140 with this assumption as it showed a significant decrease of response times over the course of learning,  
141  $F_{1.00,38.00} = 25.86$ ,  $p < 0.001$  (Figs. 1e, S2e). More directly, we expected that participants would learn  
142 the probabilistic transition structure of images and response buttons during graph trials, including  
143 the change in transition structure in the middle of the third run. Specifically, we hypothesized that  
144 participants would not only learn about one-step transition probabilities, but also form internal maps  
145 of the underlying graphs that reflect the higher-order structure of statistical multi-step relationships  
146 between stimuli, i.e., how likely a particular stimulus will be experienced in two, three, or more steps  
147 from the current time point (cf. Lynn and Bassett, 2020; Lynn et al., 2020a). In our task, this  
148 meant that participants might react differently to the three transitions that all have the same one-  
149 step transition probability, since they differ in how likely they would occur in multi-step trajectories.  
150 For instance, the one-step transition probabilities for A→C, A→D, and A→E were the same in the  
151 unidirectional graph, but the two-step probability of A→C was higher than for the other transitions,  
152 since the most likely two-step path was A→B→C. This means that participants should react faster

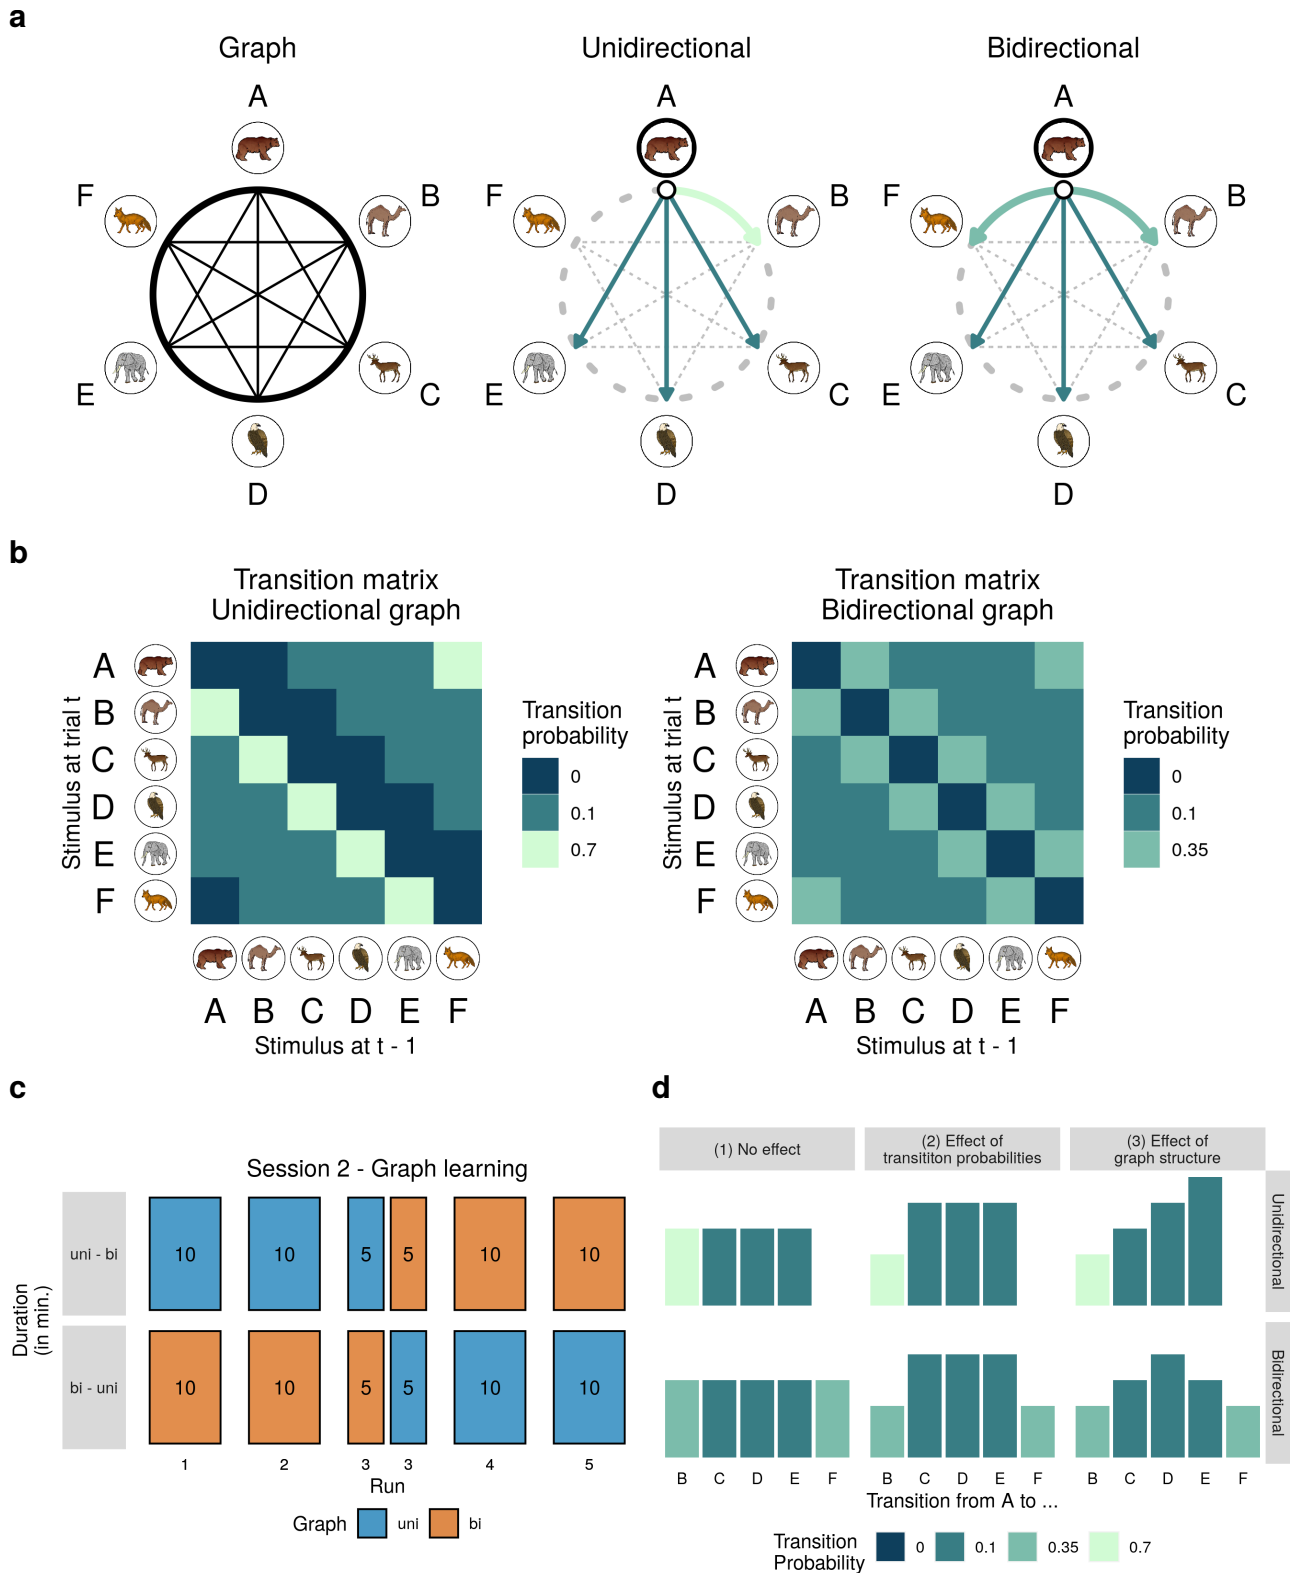

**Figure 2:** [see caption on the next page]

153 to  $A \rightarrow C$  transitions if they have multi-step knowledge. For simplicity, we will henceforth refer to the  
 154  $A \rightarrow C$  transition as having a shorter “node distance”, than  $A \rightarrow D$  or  $A \rightarrow E$  (see the rightmost column  
 155 in Fig. 2d, where colors reflect one-step transition probabilities, and the height of the bars indicate  
 156 node distance).

**Figure 2: Graph learning task.** (a) The relationships among the six task stimuli depicted as a ring-like graph structure (left). In the unidirectional graph (middle), stimuli frequently transitioned to the clockwise neighboring node ( $p_{ij} = p_{AB} = 0.7$ ), never to the counterclockwise neighboring node ( $p_{AF} = 0.0$ ), and only occasionally to the three other nodes ( $p_{AC} = p_{AD} = p_{AE} = 0.1$ ). In the bidirectional graph (right), stimuli were equally likely to transition to the clockwise or counterclockwise neighboring node ( $p_{AB} = p_{AF} = 0.35$ ) and only occasionally transitioned to the three other nodes ( $p_{AC} = p_{AD} = p_{AE} = 0.1$ ). Transition probabilities are highlighted for node *A* only, but apply equally to all other nodes. Arrows indicate possible transitions, colors indicate transition probabilities (for a legend, see panel b). (b) Transition matrices of the unidirectional (left) and bidirectional (right) graph structures. Each matrix depicts the probability (colors) of transitioning from the stimulus at the previous trial  $t - 1$  (x-axis) to the current stimulus at trial  $t$  (y-axis). (c) Within-participant order of the two graph structures across the five runs of the graph learning task.  $n = 12$  participants first experienced the unidirectional, then the bidirectional graph structure (uni - bi; top horizontal panel) while  $n = 27$  participants experienced the reverse order (bi - uni; bottom horizontal panel). In both groups of participants, the graph structure was changed without prior announcement halfway through the third task run. Numbers indicate approximate run duration in minutes (min). Colors indicate graph condition (uni vs. bi; see legend). (d) Visualization of the relative magnitude of the outcome variable (e.g., behavioral responses or classifier probabilities; y-axis) for specific transitions between the nodes (x-axis) and the two graph structures (uni vs. bi; horizontal panels) under the three assumptions (vertical panels), (1) that there is no difference between transitions (null hypothesis), (2) that response times are only influenced by the one-step transition probabilities between the nodes (colors), or (3) that response times are influenced by the multi-step relationships between nodes in the graph structure (here indicated by node distance). An effect of unidirectional graph structure would be evident in a linear relationship between node distance and the outcome variable, whereas a bidirectional graph structure would be reflected in a U-shaped relationship between node distance and independent measures (possibly inverted, depending on the measure). The stimulus material (individual images of a bear, a dromedary, a deer, an eagle, an elephant and a fox) shown in (a), and (b) were taken from a set of colored and shaded images commissioned by Rossion and Pourtois (2004), which are loosely based on images from the original Snodgrass and Vanderwart set (Snodgrass and Vanderwart, 1980). The images are freely available from the internet at <https://sites.google.com/andrew.cmu.edu/tarrlab/resources/tarrlab-stimuli> under the terms of the Creative Commons Attribution-NonCommercial-ShareAlike 3.0 Unported license (CC BY-NC-SA 3.0; for details, see <https://creativecommons.org/licenses/by-nc-sa/3.0/>). Stimulus images courtesy of Michael J. Tarr, Carnegie Mellon University, (for details, see <http://www.tarrlab.org/>).

157 A first analysis revealed that participants reacted faster and more accurately to transitions with  
158 high compared to low one-step probabilities in the unidirectional graph condition ( $p_{ij} = 0.7$  versus  
159  $p_{ij} = 0.1$  transition probabilities,  $ps < 0.001$ ), and in the bidirectional graph condition ( $p_{ij} = 0.35$   
160 versus  $p_{ij} = 0.1$ ,  $ps < 0.001$ , Fig. 3a–b). In order to investigate whether multi-step transition  
161 probabilities also influenced participants’ behavior, we then analyzed response times and error rates  
162 as a function of the node distance (Fig. 2d; for details, see Methods). Using this analysis approach, we  
163 found a significant effect of node distance on response times in both unidirectional,  $F_{1.00,115.78} = 44.34$ ,  
164  $p < 0.001$ , and bidirectional data,  $F_{1.00,38.00} = 57.36$ ,  $p < 0.001$  (Fig. 3c). To further disentangle the  
165 effects of one-step and multi-step knowledge, we excluded data of frequent transitions ( $p_{ij} = 0.7$  and  
166  $p_{ij} = 0.35$  in the uni and bi conditions, respectively). In this case, the effect of node distance on  
167 response times in the unidirectional condition disappeared,  $F_{1.00,72.32} = 0.43$ ,  $p = 0.51$ , but persisted  
168 in bidirectional data,  $F_{1.00,76.98} = 5.52$ ,  $p = 0.02$  (Fig. 3c). No effects on behavioral accuracy were  
169 observed in either of the above analyses (all  $ps > 0.11$ ).

170 While these results offer a first indication of incidental learning of multi-step transitions, node  
171 distance is only an approximate reflection of the graph structure. A more precise way to express  
172 multi-step knowledge is to consider the discounted sum of different  $n$ -step probabilities as experienced  
173 by participants. This is equivalent to successor representation (SR) models (Dayan, 1993), which  
174 assume a representation of each node that reflects the discounted long-term occupation probability  
175 of all other nodes starting from the current node. Notably, recent work has shown that SRs can  
176 be updated through replay, rather than through online experience alone (Russek et al., 2017). We  
177 therefore investigated whether behavior reflected integrated mental SR-based maps of the experienced  
178 graph structure.

179 Specifically, for each node we modeled a vector that reflected the probability that starting from  
180 there a participant would experience any of the other nodes over a future-discounted predictive horizon.  
181 This vector was dynamically updated following the transitions that participants experienced in the  
182 task, using a temporal difference (TD) learning rule as used in SR models (Dayan, 1993; Russek et al.,  
183 2017). After experiencing the transition from image  $s_t$  to  $s_{t+1}$ , the row corresponding to image  $s_t$  of  
184 the successor matrix  $\mathbf{M}$  was updated as

$$\mathbf{M}_{s_t,*} = \mathbf{M}_{s_t,*} + \alpha [\mathbf{1}_{s_{t+1}} + \gamma \mathbf{M}_{s_{t+1},*} - \mathbf{M}_{s_t,*}] \quad (1)$$

185 whereby  $\mathbf{1}_{s_{t+1}}$  is a zero vector with a 1 in the  $s_{t+1}$ <sup>th</sup> position, and  $\alpha$  is a learning rate. Crucially, the  
186 discounting parameter  $\gamma$  defined the extent to which multi-step transitions were taken into account,  
187 which we will henceforth refer to as the “predictive horizon” (cf. Gershman et al., 2012; Momennejad,  
188 2020). We computed a series of SR models with different predictive horizons between  $\gamma = 0$  (no  
189 predictive horizon) and  $\gamma = 0.95$  (in steps of 0.05), and asked how well response times could be  
190 predicted from these individually calculated, time-varying SRs (for details, see Methods). We then  
191 compared different LME models of response time, with a Shannon surprise predictor (cf. Shannon,  
192 1948) derived from each participants’ SR model, in addition to fixed effects of task run, graph (uni  
193 vs. bi) and graph order (uni – bi vs. bi – uni) as well as by-participant random intercepts and slopes.  
194 Comparing LME models that contained predictors from SR models with varying predictive horizons  
195 (i.e., levels of  $\gamma$ ) showed that a discount parameter of  $\gamma = 0.3$  resulted in the lowest Akaike information  
196 criterion (AIC) score (Fig. 3d), and models with non-zero  $\gamma$  parameters yielded substantially better  
197 fits than a model which assumed only knowledge of one-step transitions ( $\gamma = 0$ , leftmost data point in  
198 Fig. 3d). Thus, participants’ response times clearly indicated multi-step graph knowledge consistent  
199 with SR models.

200 To investigate if these analyses would differ between the two graph structures (uni vs. bi) and the  
201 two graph orders (uni – bi vs. bi – uni), we split the data according to these two factors and repeated  
202 a similar analysis of LME models (for details, see Methods). These analyses again showed that models  
203 based on a non-zero  $\gamma$  parameter achieved better fits, confirming that participants learned higher-order  
204 relationships among the nodes in the graph structure from experiencing sequences of transitions in the  
205 task (Fig. 3e). Interestingly, data from the first graph structure were fit best by the same  $\gamma$  parameter  
206 ( $\gamma = 0.55$ ), irrespective of graph condition (uni vs. bi; Fig. 3e, left panel column). When considering  
207 data from the second graph structure, in contrast, the depth of integration differed markedly depending  
208 on whether participants learned the uni- or bidirectional graph structure: participants who transitioned  
209 from the uni- to the bidirectional graph condition had a larger predictive horizon ( $\gamma = 0.75$ ; Fig. 3e,  
210 top right panel) in the second graph learning phase compared to participants who transitioned from  
211 a bi- to a unidirectional graph ( $\gamma = 0.3$ ; Fig. 3e, bottom right panel). These results indicated that  
212 the order in which graphs were experienced determined the depth of integration when learning was  
213 updated following a change in transition probabilities.

214 Finally, we assessed whether participants were able to express knowledge of the sequential ordering  
215 of stimuli and graph structures explicitly during a post-task questionnaire. Asked whether they had  
216 noticed any sequential ordering of the stimuli in the preceding graph task,  $n = 19$  participants replied  
217 “yes” and  $n = 20$  replied “no” (Fig. 3f). Of those participants who noticed sequential ordering  
218 ( $n = 19$ ), almost all (18 out of 19) indicated that they had noticed ordering within the first three runs  
219 of the task (Fig. 3g), and more than half of those participants (11 out of 19) indicated that they had  
220 noticed ordering during the third task run, i.e., the run during which the graph structure was changed.



221 Thus, sequential ordering of task stimuli remained at least partially implicit in half of the sample,  
222 and the change in the sequential order halfway through the third run of graph trials seemed to be one  
223 potential cause for the conscious realization of sequential structure. Participants were also asked to rate  
224 the transition probabilities of all pairwise sequential combinations of the six task stimuli (30 ratings in  
225 total). Interestingly, participants on average reported probability ratings that reflected bidirectional  
226 graph structure. Probabilities of transitions to clockwise and counterclockwise neighboring nodes were  
227 rated higher than rarer transitions to intermediate nodes, regardless of the order in which participants  
228 had experienced the two graph structures immediately before the questionnaire (Fig. 3h).

---

**Figure 3: Behavioral responses are modulated by transition probabilities and graph structure.** (a) Behavioral accuracy (y-axis) following transitions with low ( $p_{ij} = 0.1$ ) and high probability (x-axis;  $p_{ij} = 0.7$  and  $p_{ij} = 0.35$  in the uni and bi conditions, respectively) for both graph structures (panels). Colors as in Fig. 2d. The horizontal dashed lines indicate the chance level (16.67%). (b) Log response time (y-axis) following transitions with low ( $p_{ij} = 0.1$ ) and high probability (x-axis;  $p_{ij} = 0.7$  and  $p_{ij} = 0.35$  in the uni and bi conditions, respectively) for both graph structures (panels). Colors as in panel (a) and Fig. 2d. (c) Log response times (y-axis) as a function of uni- or bidirectional (u | b) node distance (x-axis) in data from the two graph structures (colors / panels). (d) AIC scores (y-axis) for LME models fit to participants' log response time data using Shannon surprise based on SRs with varying predictive horizons (the discounting parameter  $\gamma$ ; x-axis) as the predictor variable. (e) AIC scores (y-axis) for LME models fit to participants' log response time data using Shannon information based on SRs with varying predictive horizons (the discounting parameter  $\gamma$ ; x-axis) as the predictor variable, separated by graph order (uni – bi vs. bi – uni; horizontal panels) and graph condition (uni vs. bi; panel colors). (f) Number of participants (y-axis) indicating whether they had noticed any sequential ordering during the graph task (“yes” or “no”, x-axis). (g) Number of those participants (y-axis) who had detected sequential ordering indicating in which of the five runs of the graph task (x-axis) they had first noticed sequential ordering. (h) Ratings of pairwise transition probabilities (in %; y-axis) as a function of node distance / transition probability, separately for both graph orderings (uni – bi vs. bi – uni; panels). Boxplots in (a), (b), (c), and (h) indicate the median and IQR. The lower and upper hinges correspond to the first and third quartiles (the 25<sup>th</sup> and 75<sup>th</sup> percentiles). The upper whisker extends from the hinge to the largest value no further than 1.5\* IQR from the hinge (where IQR is the interquartile range (IQR), or distance between the first and third quartiles). The lower whisker extends from the hinge to the smallest value at most 1.5\* IQR of the hinge. The diamond shapes in (a), (b), (c), and (h) show the sample mean. Error bars and shaded areas in (a), (b), (c), and (h) indicate  $\pm 1$  SEM. Each dot in (a), (b), (c), and (h) corresponds to averaged data from one participant. Vertical lines in (d) and (e) mark the lowest AIC score. All statistics have been derived from data of  $n = 39$  human participants who participated in one experiment.

---

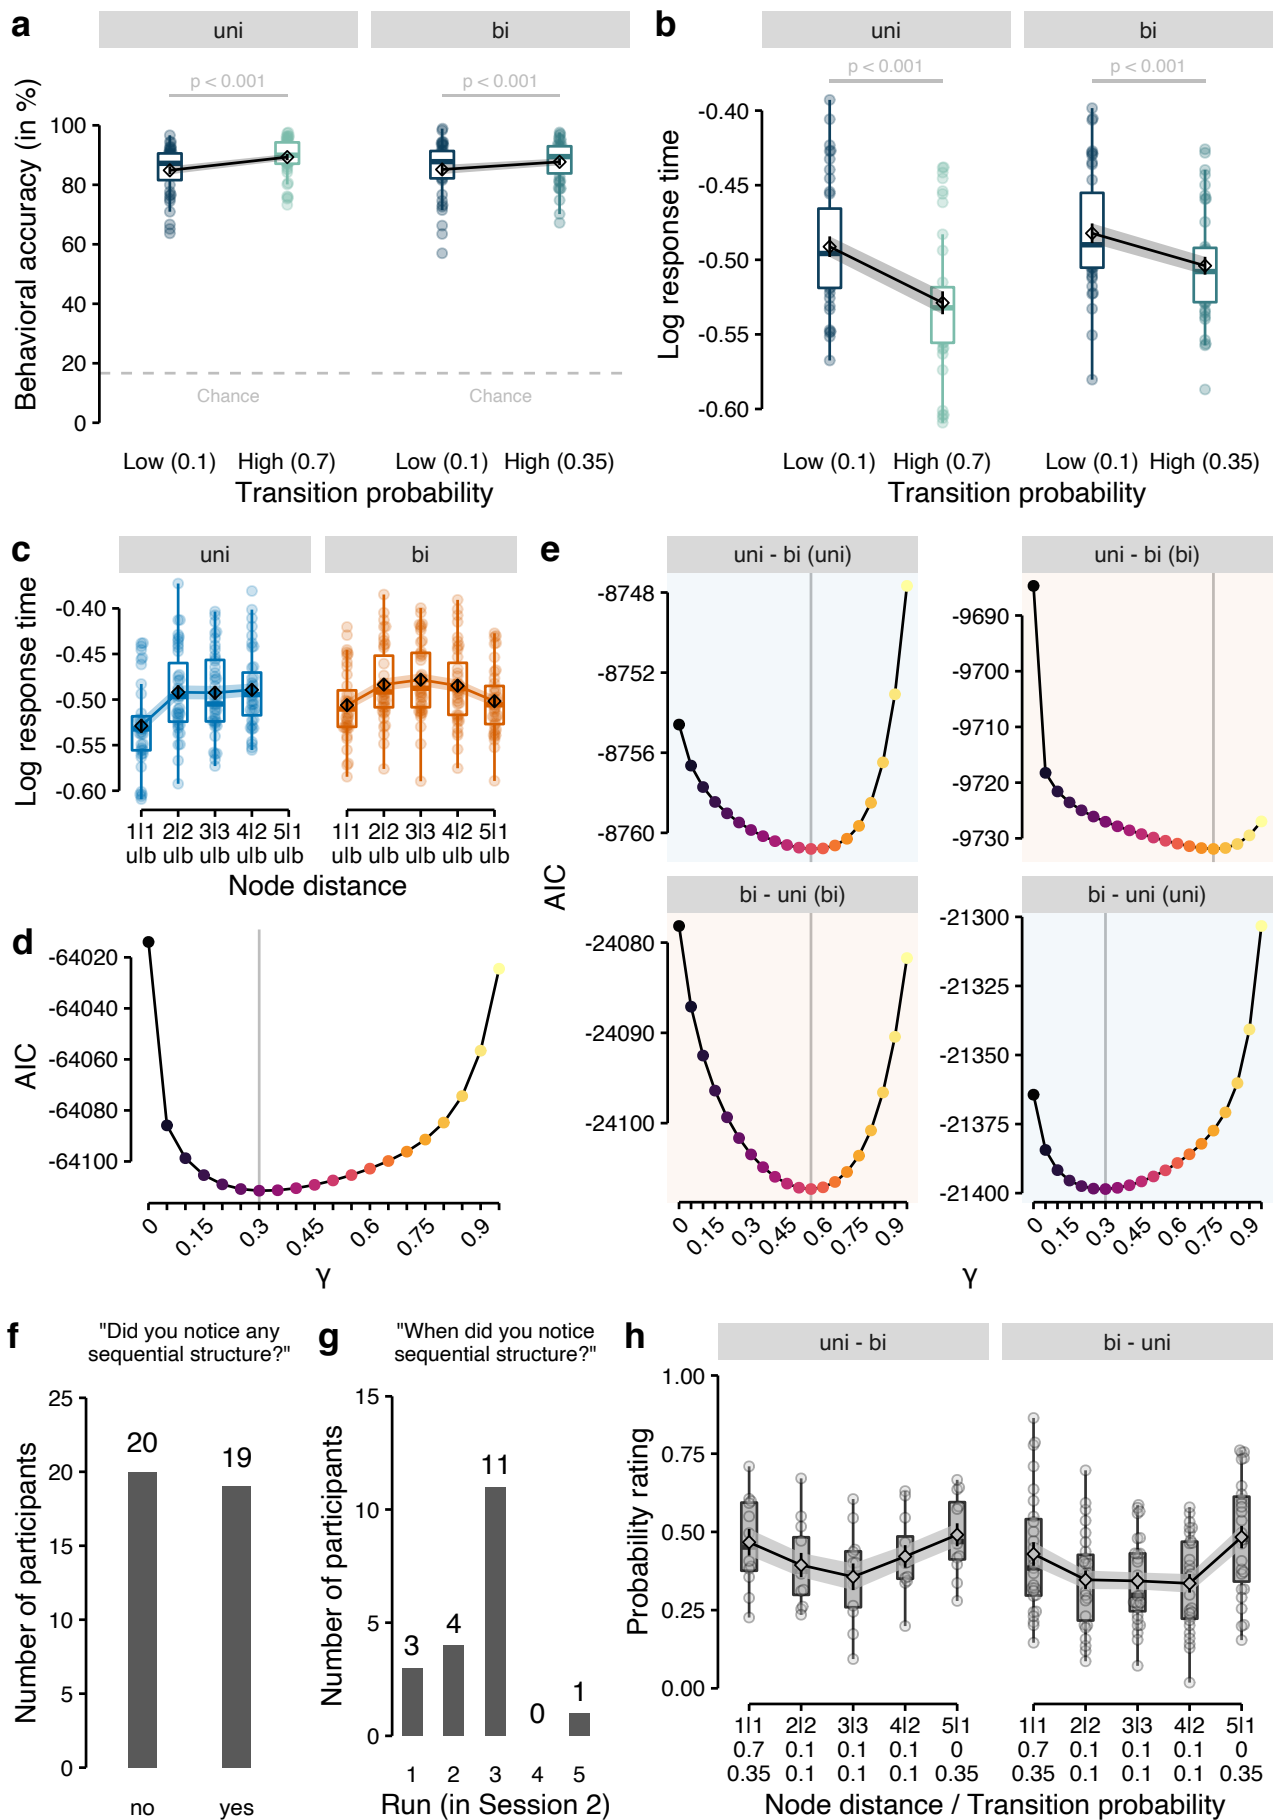

Figure 3: [see caption on the previous page]

## 229 fMRI results

230 We next asked whether learning of map-like graph representations was accompanied by on-task replay.  
231 First, we trained logistic regression classifiers on fMRI signals related to stimulus and response onsets  
232 in correct recall trials (one-versus-rest training; for details, see Methods; cf. Wittkuhn and Schuck,  
233 2021). Separate classifiers were trained on data from gray-matter-restricted anatomical regions of  
234 interest (ROIs) of (a) occipito-temporal cortex and (b) pre- and postcentral gyri, which reflect visual  
235 object processing (cf. Haxby et al., 2001) and sensorimotor activity (e.g., Kolasinski et al., 2016),  
236 respectively. In each case, a single repetition time (TR) per trial corresponding either to the onset of  
237 the visual stimulus, or to participants' motor response was chosen (accounting for hemodynamic lag,  
238 time points were shifted by roughly 4 s; for details, see Methods). Note, that the order of displayed  
239 animals in recall trials was random, and image displays and motor responses were separated by SRIs  
240 and ITIs of 2500 ms to reduce temporal autocorrelation (cf. Dale, 1999; Wittkuhn and Schuck, 2021).

241 The trained classifiers successfully distinguished between the six animals. Leave-one-run-out clas-  
242 sification accuracy was  $M = 63.08\%$  in occipito-temporal data ( $SD = 12.57$ ,  $t_{38} = 23.06$ , CI [59.69,  
243  $+\infty$ ],  $p < 0.001$ , compared to a chance level of 16.67%,  $d = 3.69$ ) and  $M = 47.05\%$  in motor cortex  
244 data ( $SD = 7.79\%$ ,  $t_{38} = 24.36$ , CI [44.95,  $+\infty$ ],  $p < 0.001$ , compared to a chance level of 16.67%,  
245  $d = 3.90$ , all  $p$ -values Bonferroni-corrected, Fig. 4a). We also tested whether the classifiers successfully  
246 generalized from session 1 (eight recall runs) to session 2 (one recall run), and found no evidence for  
247 diminished cross-session decoding, compared to within-session,  $F_{8,00,655.00} = 0.95$ ,  $p = 0.48$  (for details  
248 see Methods). Next, we examined the sensitivity of the classifiers to pattern activation time courses by  
249 applying them to fifteen TRs following event onsets in recall trials (cf. Wittkuhn and Schuck, 2021).  
250 This analysis showed that the estimated normalized classification probability of the true stimulus class  
251 given the data peaked at the fourth TR as expected (Fig. 4b), where the probability of the true event  
252 was significantly higher than the mean probability of all other events at that time point (difference  
253 between current vs. other events; motor:  $M = 12.24$ ,  $t_{38} = 32.10$ , CI [11.47, 13.01],  $p < 0.001$ ,  
254  $d = 5.14$ ; occipito-temporal:  $M = 17.88$ ,  $t_{38} = 21.72$ , CI [16.22, 19.55],  $p < 0.001$ ,  $d = 3.48$ , all  
255  $p$ -values Bonferroni-corrected; Fig. 4b).

256 To address our main questions concerning on-task neural replay, we applied the classifiers to data  
257 from the graph trials that included 10 s on-task intervals (ITIs) with only a fixation on screen (120 trials  
258 per participant in total; 24 trials per run; 4 trials per stimulus per run; 10 s correspond to 8 TRs). We  
259 expected that participants would replay anticipated upcoming events or recently experienced event  
260 sequences during these on-task intervals, and that such replay would be evident in the ordering of  
261 classification probabilities. Crucially, classifier probabilities should reflect participants' knowledge of  
262 one-step transitions, but also their map-like representations that enabled them to form multi-step  
263 expectations, as described above. For example, in unidirectional graph trials image  $A$  was followed  
264 by image  $B$  with a higher probability than the other images. Therefore, the probability of decoding  
265 image  $B$  during an on-task interval following image  $A$  should be higher than the classifier probabilities  
266 of the other four possible next images (see Fig. 2a). In addition, although images  $C$ ,  $D$ , and  $E$   
267 had equal one-step transition probabilities, we expected the corresponding classifier probabilities to  
268 be ordered such as to reflect the multi-step SR-model described above. Following our previous work  
269 (Wittkuhn and Schuck, 2021), we also assumed that the ordering during the earlier phase of the on-  
270 task interval (TRs 1–4) would reflect the true directionality of the replayed sequence and would be  
271 reversed in the later phase of the interval (TRs 5–8), reflecting the rising and falling slopes of the  
272 underlying hemodynamic response functions (HRFs). As expected, the classifier probability of the

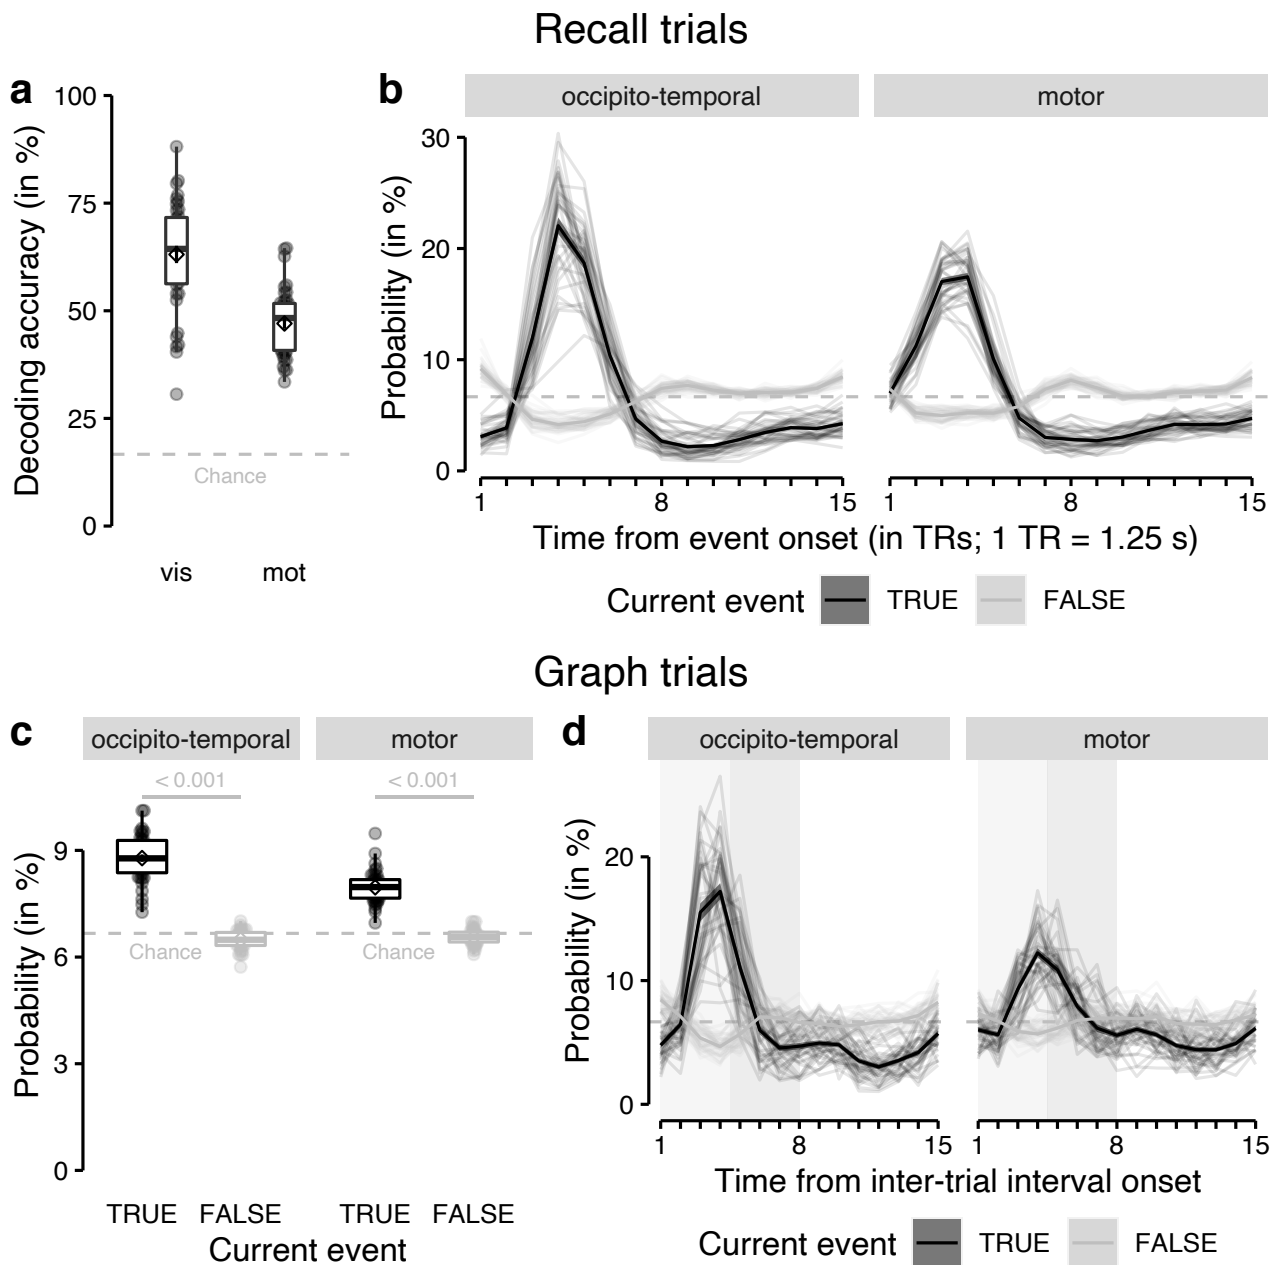

**Figure 4:** [see caption on the next page]

273 animal displayed in the current trial was higher compared to all other classes (Fig. 4c), and rising  
 274 and falling slowly as observed in recall trials (Fig. 4d, Fig. 5a; mean probability of current event vs.  
 275 all others;  $t_s \geq 17.88$ ,  $p_s < .001$ ,  $d_s \geq 3.48$ ,  $p$ -values Bonferroni-corrected). Because stimulus-evoked  
 276 activation was not of interest, we removed probabilities of the current stimulus from all following  
 277 analyses, considering only (normalized) probabilities from the five classes that did not occur on the  
 278 current trial.

279 To investigate replay of experienced or anticipated stimulus sequences, we modeled classifier prob-  
 280 abilities of non-displayed stimuli with LME models. LME models contained predictors that reflected  
 281 node distance, i.e., how likely each stimulus was to appear soon, given either a unidirectional (lin-  
 282 ear node distance) or bidirectional graph (quadratic node distance, see above). Because linear and  
 283 quadratic predictors were collinear, corresponding LME models were run separately. Each model  
 284 included fixed effects of ROIs (occipito-temporal vs. sensorimotor) and ITI phase (early vs. late).

**Figure 4: Classification accuracy and probabilistic classifier time courses on recall and graph trials.** (a) Cross-validated classification accuracy (in %) in decoding the six unique visual objects in occipito-temporal data (“vis”) and six unique motor responses in sensorimotor cortex data (“mot”) during task performance. Chance level is at 16.67% (horizontal dashed line). (b) Time courses (in TRs from stimulus onset; x-axis) of probabilistic classification evidence (in %; y-axis) for the event on the current recall trial (black) compared to all other events (gray), separately for both ROIs (panels). (c) Mean classifier probability (in %; y-axis) for the event that occurred on the current graph trial (black color), shortly before the onset of the on-task interval, compared to all other events (gray color), averaged across all TRs in the on-task interval, separately for each ROI (panels). (d) Time courses (in TRs from on-task interval onset; x-axis) of mean probabilistic classification evidence (in %; y-axis) in graph trials for the event that occurred on the current trial (black) and all other events (gray). Each line in (b) and (c) represents one participant. Classifier probabilities in (b), (c), and (d) were normalized across 15 TRs. The chance level therefore is at  $100/15 = 6.67\%$  (horizontal dashed line). Gray rectangles in (d) indicate the on-task interval (TRs 1–8). The light and dark gray areas in (d) indicate early (TRs 1–4) and late (TRs 5–8) phases, respectively. Boxplots in (a) and (c) indicate the median and IQR. The lower and upper hinges correspond to the first and third quartiles (the 25<sup>th</sup> and 75<sup>th</sup> percentiles). The upper whisker extends from the hinge to the largest value no further than  $1.5 \times$  IQR from the hinge (where IQR is the interquartile range (IQR), or distance between the first and third quartiles). The lower whisker extends from the hinge to the smallest value at most  $1.5 \times$  IQR of the hinge. The diamond shapes in (a) and (c) show the sample mean. Error bars and shaded areas indicate  $\pm 1$  SEM. Each dot corresponds to averaged data from one participant. All statistics have been derived from data of  $n = 39$  human participants who participated in one experiment.

285 Considering data from runs in which stimulus transitions were governed by the unidirectional graph,  
286 an LME model containing the linear node distance predictor indicated a three-way interaction between  
287 node distance, ROI and phase  $F_{1.00,852.00} = 7.21$ ,  $p = 0.007$ . Post-hoc tests revealed an effect of node  
288 distance on classifier probabilities in unidirectional data in both ROIs in the early phase (TRs 1–4)  
289 of the ITIs,  $F_{1.00,810.00} \geq 78.18$ ,  $ps < 0.001$ , akin to backward replay of recently experienced stimuli.  
290 Effects in the late phase failed to reach significance (TRs 5–8),  $ps \leq 0.11$  (Fig. 5c). Considering  
291 data from the bidirectional run, we found a corresponding three-way interaction between bidirectional  
292 node distance, ROI and phase  $F_{1.00,852.00} = 5.59$ ,  $p = 0.02$ . Again, post-hoc tests revealed an effect  
293 of bidirectional node distance on classifier probabilities in both ROIs, showing a sign reversal when  
294 comparing the early to the late phase of the ITIs,  $F_{1.00,810.00} \geq 7.09$ ,  $ps \leq 0.008$  (Fig. 5c), in line  
295 with our expectations about on-task multi-step replay. Although linear and quadratic node distance  
296 predictors were collinear and therefore difficult to disentangle, we next tried to assess the specificity  
297 of the above effects by testing the linear (unidirectional) node distance on bidirectional data and the  
298 quadratic (bidirectional) node distance on unidirectional data. When a linear predictor was used  
299 in an LME model of bidirectional data, only a main effect of phase (early vs. late) was observed,  
300  $F_{1.00,852.00} = 11.55$ ,  $p < 0.001$ , but no main effect of the linear predictor,  $F_{1.00,852.00} = 0.27$ ,  $p = 0.60$ ,  
301 or any interactions among the predictor variables,  $ps \leq 0.09$ . Importantly, direct model comparison  
302 revealed that the linear model fit better in the unidirectional graph condition and the early phase  
303 of the ITI (see Fig. S6a–b). Using the quadratic predictor in the analysis of unidirectional data,  
304 we observed a three-way interaction between bidirectional node distance, the ROI, and the phase,  
305  $F_{1.00,852.00} = 4.35$ ,  $p = 0.04$ . Post-hoc tests revealed an effect of bidirectional node distance on classi-  
306 fier probabilities in unidirectional data only in the occipito-temporal ROI and only in the early phase  
307 (TRs 1–4) of the ITIs,  $F_{1.00,810.00} \geq 5.56$ ,  $ps < 0.02$  (Fig. 5c). Yet, model comparison again showed  
308 that the the quadratic model fit better in the bidirectional graph condition in both TR phases (dif-  
309 ferences in AICs were between  $-31.02$  and  $162.03$ , see Fig. S6a–b). Hence, these analyses confirmed  
310 that the observed classifier ordering was specific to the currently experienced graph.

311 The above analysis assumed that replayed sequences would always follow the most likely transitions  
312 (assuming a fixed ordering of replay sequences according to the multi-step graph structure). Yet, replay

313 might correspond more closely to a mental simulation of several possible sequences that are generated  
314 from a mental model. Consistent with this idea, the distribution of the observed sequential orders  
315 of classifier probabilities indicated a wide variety of replayed sequences (Fig. 5d, distribution over  
316 the entire ITI of 8 TRs). We next quantified how likely each possible sequential ordering of 5-item  
317 sequences was, based on the transition probabilities estimated by the SR model described above ( $\gamma$   
318 was set to 0.3 in order to approximate to the mean level of planning depth we had estimated based on  
319 the behavioral data, see above). To model measurement noise in the observed relative to the predicted  
320 sequences, we employed a hidden markov model (HMM) with structured emission probabilities (for  
321 details, see Methods). This revealed that during the unidirectional runs, the frequency with which  
322 we observed a sequence in brain data during the on-task pauses, strongly related to the probability  
323 of that sequence given the unidirectional graph structure (occipito-temporal ROI:  $r = .51$ ,  $p < 0.001$ ;  
324 motor ROI:  $r = .35$ ,  $p < 0.001$ ; Fig. 5e). Unexpectedly, this was not the case for the bidirectional  
325 runs ( $p = 0.21$  and  $p = 0.50$ , respectively; Fig. 5e).

326 We then sought to characterize the time courses of evidence for replay of sequences most likely  
327 to occur when mentally simulating a given sequence in the two graph structures. To this end, we  
328 calculated TR-wise linear regression slopes between the classifier probabilities and the 24 most likely  
329 sequences (top 20% of the  $5! = 120$  possible permutations), which resulted in an average sequentiality  
330 metric for each TR, similar to our previous work (Wittkuhn and Schuck, 2021). This analysis revealed  
331 significant backward sequentiality in the earlier phase (TRs 1–4) of the ITIs based on data from the  
332 unidirectional graph structure in both ROIs specifically for those sequences that were most likely  
333 given the unidirectional graph structure,  $t_{38}$ 's  $\leq -7.51$ ,  $ps < 0.001$ ,  $p$ -values Bonferroni-corrected (80  
334 – 100%; Fig. 5e). We did not find evidence for sequentiality in the late phase of the interval (TRs  
335 5–8) for either ROI in the unidirectional condition ( $ps > 0.97$ ). These findings mirror the results from  
336 the analysis of classification probabilities (see above) in showing that classifier probabilities in earlier  
337 TRs of fMRI data with unidirectional graph structure are ordered backward relative to the sequential  
338 ordering implied by the graph structure. In the bidirectional condition, we found forward sequentiality  
339 in the earlier phase (TRs 1–4;  $t_{38}$ 's  $\geq 3.90$ ,  $ps < 0.02$ ,  $ds \geq 0.63$ ) of the ITI and backward sequentiality  
340 in the later phase (TRs 5–8;  $t_{38}$ 's  $\leq -4.31$ ,  $ps < 0.001$ ,  $ds \leq -0.69$ ), in occipito-temporal data for the  
341 top 40% most likely sequences (i.e., both 80–100% and 60–80%,  $p$ -values Bonferroni-corrected, Fig.  
342 5e). Again, these results were in line with the analyses of classification probabilities, that found an  
343 influence on bidirectional graph structure in both early and late TRs.

344 Together, these results provide evidence that classifier probabilities in ITIs of graph trials are  
345 modulated by the multi-step distances between nodes in the graph structure. These effects of multi-  
346 step distances are in line with the idea that participants replayed multi-step sequences during brief  
347 on-task pauses, which could provide the basis for participants' map-like knowledge of incidentally  
348 experienced graph structures. When transition probabilities among stimuli in the task followed a  
349 unidirectional graph structure, classifier probabilities are influenced by a linear ordering of nodes  
350 that scales with the distance among the nodes in a unidirectional ordering, albeit only in earlier  
351 TRs following ITI onset (Fig. 5). When classifier probabilities from trials of the bidirectional graph  
352 structure are considered, classifier probabilities are influenced by a quadratic relationship to node  
353 distance (modeling a bidirectional ordering of nodes), in both the early (TRs 1–4) and late (TRs 5–8)  
354 phases of the ITIs and in both ROIs (Fig. 5). The graph distance effect appeared more pronounced  
355 in earlier compared to later TRs, but was present in both occipito-temporal and motor ROIs and  
356 followed a similar dynamic with respect to early and late phases of the ITI in both ROIs.

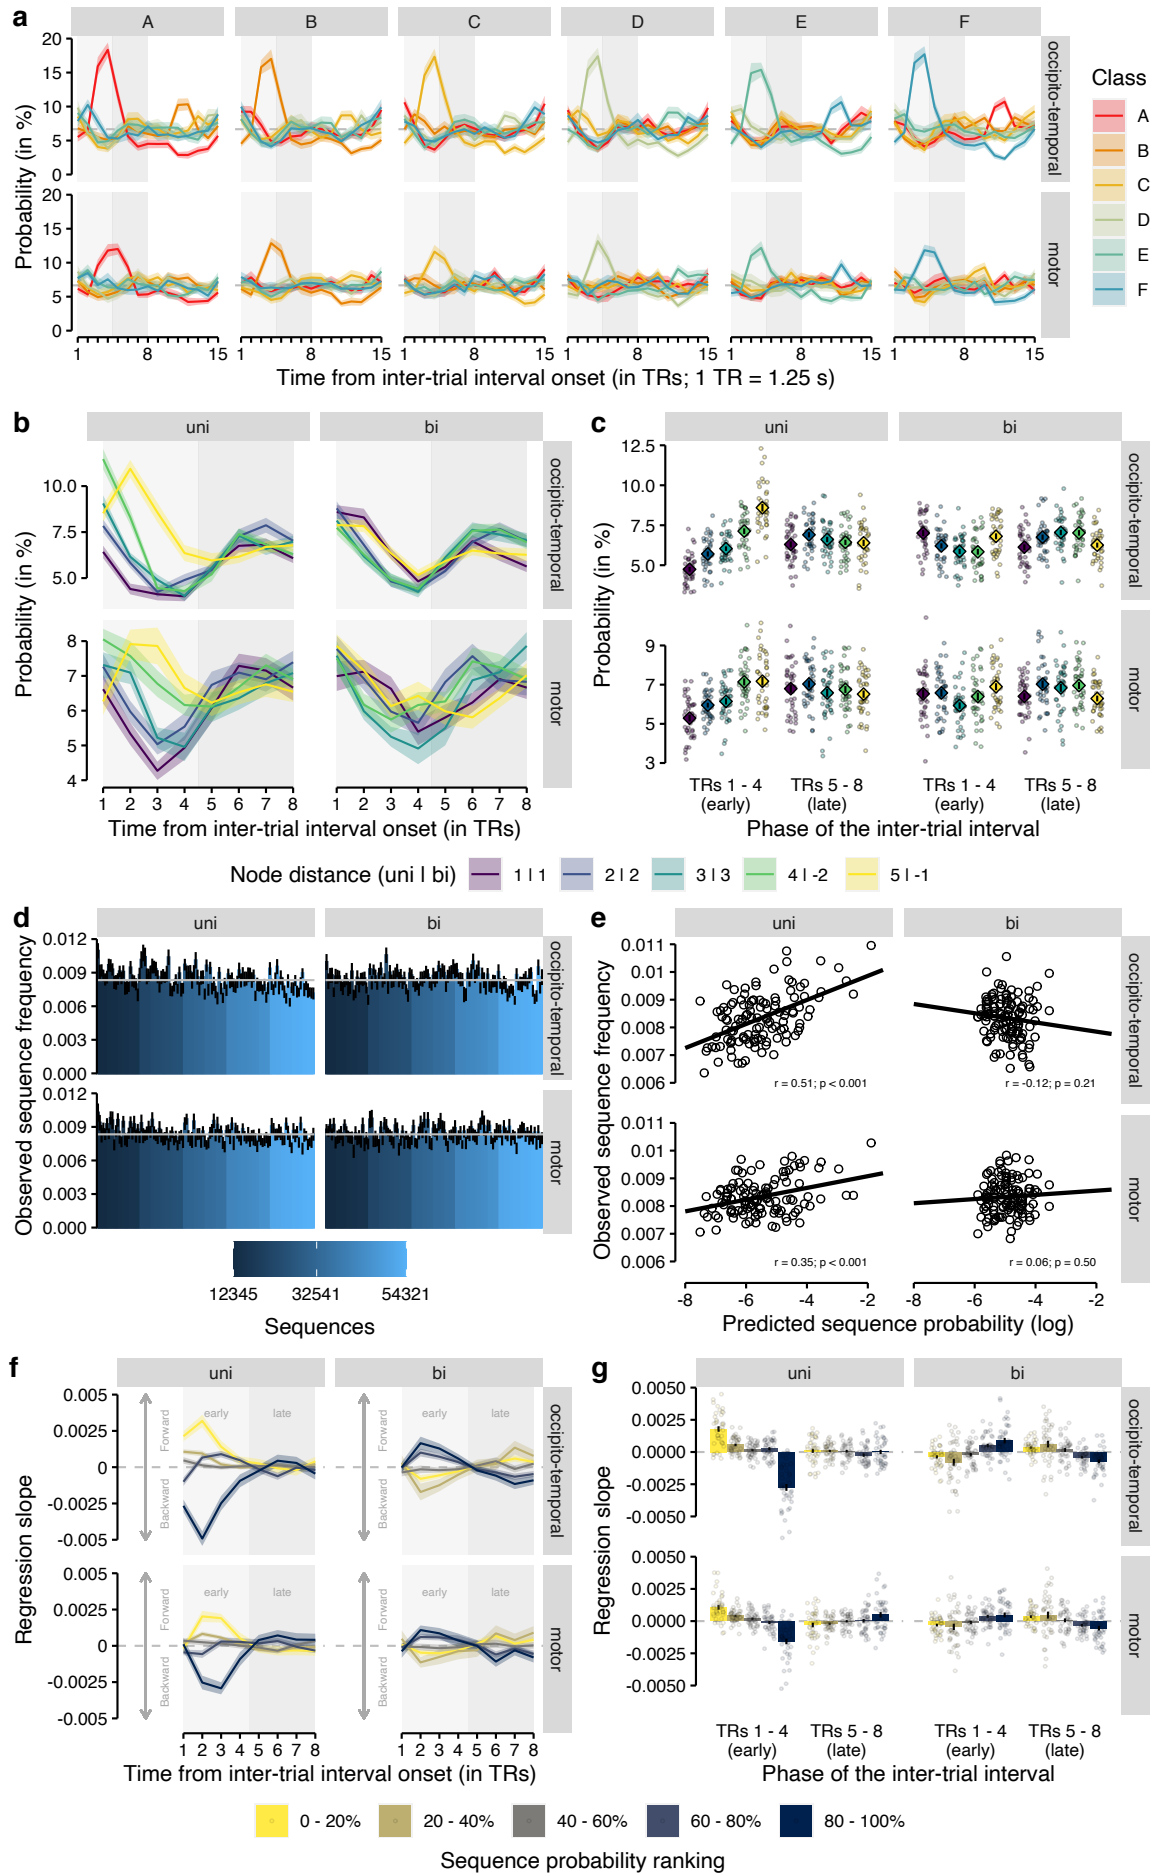

**Figure 5:** [see caption on the next page]

---

**Figure 5: Classifier probabilities during inter-trial intervals (ITIs) of graph trials are modulated by node distances in the graph structure.** (a) Time courses (in TRs from ITI onset; x-axis) of mean probabilistic classification evidence (in %; y-axis) for each of the six classes (colors) depending on the event of the current trial (vertical panels) and the anatomical ROI (horizontal panels). The event of the current trial (stimulus presentation or motor response) happened a few hundred ms before the onset of the ITI (for the trial procedure of graph trials, see Fig. 1b). (b) Time courses (in TRs from ITI onset; x-axis) of mean probabilistic classification evidence (in %; y-axis) for each of the five classes that were not presented on the current trial, colored by node distance in the two graph structures (vertical panels) for both anatomical ROI (horizontal panels). (c) Mean probabilistic classification evidence (in %; y-axis) for each node distance (colors) in the unidirectional (left vertical panel) and bidirectional (right vertical panel) graph structures averaged across TRs in the early (TRs 1–4) or late (TRs 5–8) phase (x-axis) for data in the occipito-temporal (top horizontal panels) and motor (bottom horizontal panels) ROIs. (d) Relative frequencies (y-axis) of all 120 permutations of probability-ordered 5-item sequences within each TR observed during on-task intervals, separately for both graph structures (vertical panels) and anatomical ROIs (horizontal panels). The horizontal gray line indicates the expected frequency if all sequences would occur equally often ( $1/120 = 0.008$ ). Colors indicate sequence ordering from forward (e.g., 12345; dark blue) to backward (e.g., 54321; light blue) sequences. (e) Correlations (Pearson’s  $r$ ) between the predicted sequence probability and the observed sequence frequency (120 5-item sequences per correlation), separately for both graph structures (vertical panels) and anatomical ROIs (horizontal panels). Each dot represents one 5-item sequence. (f) Regression slopes (y-axis) relating classifier probabilities to sequential positions for both graph structures (vertical panels) and anatomical ROIs (horizontal panels). Sequential orderings were determined based on a hidden markov model (HMM) identifying the most likely sequences based on the two graph structures (colors). Positive and negative slopes indicate forward and backward sequentiality, respectively (cf. Wittkuhn and Schuck, 2021). (g) Mean classifier probabilities averaged across all TRs in the early and late phase (x-axis) of the ITIs, separately for both graph structures (vertical panels) and anatomical ROIs (horizontal panels). Each dot in (c) and (g) corresponds to averaged data from one participant. Error bars in (c), (d), and (g) and shaded areas in (a), (b), and (f) represent  $\pm 1$  SEM. Gray rectangles in (a), (b), and (d) indicate the on-task interval (TRs 1–8). The light and dark gray areas in (a), (b), and (f) indicate early (TRs 1–4) and late (TRs 5–8) interval phases, respectively. 1 TR in (a), (b), and (f) = 1.25 s. All statistics have been derived from data of  $n = 39$  human participants who participated in one experiment.

---



## 357 Discussion

358 We present results showing on-task cortical replay of future sequences simulated from a mental model  
359 of an experienced graph in humans. Replay was detected in visual and sensorimotor cortex while  
360 participants briefly paused during an incidental statistical learning task. Statistical regularities in our  
361 main task were governed by two graph structures, one of which determined transitions in the first half  
362 of the experiment, while the other one determined transitions in the second half. We demonstrate that  
363 participants' response times reflect continuous learning of future-discounted predictive expectations  
364 that go beyond knowledge of one-step transitions and are captured by temporal difference (TD)  
365 learning of a successor representation (SR) model (cf. [Dayan, 1993](#)). These behavioral effects are  
366 in line with our neural results which indicate on-task replay consistent with sampling from such an  
367 SR model. Participants did not receive explicit instructions to learn and about half of participants  
368 reported no explicit knowledge of the experienced sequentiality. Learning was therefore automatic and  
369 partially implicit.

370 Our behavioral results are consistent with previous findings showing that humans learn about  
371 networks of stimuli beyond one-step transitions (e.g., [Schapiro et al., 2013](#); [Karuza et al., 2016, 2017,](#)  
372 [2019](#); [Garvert et al., 2017](#); [Kahn et al., 2018](#); [Lynn and Bassett, 2020](#); [Lynn et al., 2020a,b](#)). Our  
373 computational modeling establishes a link between these behavioral effects and an online temporal  
374 difference (TD) learning mechanism that tracks the long-term visitation probabilities. Our findings  
375 add to a growing set of studies that uses models based on SRs ([Dayan, 1993](#)) to demonstrate the  
376 formation of predictive representations of task structure in human behavioral and neuroimaging data  
377 ([Garvert et al., 2017](#); [Russek et al., 2017](#); [Momennejad et al., 2017](#); [Momennejad, 2020](#); [Russek et al.,](#)  
378 [2021](#)). Through model comparisons between SR models that differed in their discounting parameter  
379  $\gamma$ , i.e., their predictive horizon, we found that behavior overall was best explained by a medium  
380 deep predictive horizon corresponding to  $\gamma = 0.3$  (note, that any model with  $\gamma > 0$  suggests that  
381 participants formed predictive representations). When we separated the analyses by graph condition  
382 and graph order, we found that during learning of the first graph structure, planning depth was  
383 deeper, as indicated by a predictive horizon of  $\gamma = 0.55$ , irrespective of whether transition structure  
384 was governed by the uni- or bidirectional graph condition. This finding suggests that, upon entering a  
385 novel environment with sequential events, humans might integrate multi-step transition probabilities  
386 to a medium depth that is independent from the specific structure of the environment. Interestingly,  
387 after the transition structure changed to the second graph structure halfway through the task, this  
388 also seemed to influence the predictive horizon in a manner that was dependent on the order in which  
389 the two graphs were experienced. In participants who first learned the unidirectional and then the  
390 bidirectional graph, the best fitting model was based on an SR with a higher discount parameter of  
391  $\gamma = 0.75$ . This may indicate a deeper integration of higher-order relationships in the bidirectional  
392 graph structure compared to the unidirectional graph structure. In contrast, in participants who  
393 experienced the reverse order, the best fitting model during the second half of the experiment was  
394 based on an SR with a lower discount parameter of  $\gamma = 0.3$ . This could indicate a reduced predictive  
395 horizon when learning relationships in the unidirectional graph. In sum, these results suggest that  
396 participants' predictive horizon interacts with the structure of the task as well as the learning history  
397 and indicates that the depth of integration could adapt to changes in the task environment. This  
398 idea relates to recent work suggesting that the brain may host SRs at varying predictive horizons in  
399 parallel ([Momennejad and Howard, 2018](#); [Brunec and Momennejad, 2021](#)).

400 Analyzing fMRI data recorded during 10 s pauses in-between performing the main task, we found  
401 evidence that classification probabilities were modulated by the transition probabilities and multi-  
402 step node distances within the two graph structures. Applying our previously developed sequentiality  
403 metric (Schuck and Niv, 2019; Wittkuhn and Schuck, 2021), we found evidence for backward sequen-  
404 tiality in unidirectional data and forward sequentiality in bidirectional data in both occipito-temporal  
405 and motor ROIs. The sequentiality metric was strongest specifically for those sequential orderings of  
406 classification probabilities that were most likely given an SR model of the two graph structures (Fig.  
407 5). Our evidence for on-task replay relates to research in rodents, where time-compressed sequential  
408 place cell activations, called theta sequences, occur during active behavior (Foster and Wilson, 2007)  
409 and reflect multiple potential future trajectories when the animal pauses at a decision point (Johnson  
410 and Redish, 2007), or cycle between future trajectories during movement (Kay et al., 2020) possibly  
411 reflecting an online planning process. Similar relationships between hippocampal theta and planning  
412 have been observed in human magnetoencephalography (MEG) experiments (Kaplan et al., 2020),  
413 which have also yielded evidence for on-task planning in the form of fast sequential neural reactiva-  
414 tion (Kurth-Nelson et al., 2016; Eldar et al., 2020). An fMRI study in humans has related on-task  
415 prospective neural activation to model-based decision-making (Doll et al., 2015), but the temporal  
416 dynamics of the prospective neural representations remained unclear. In contrast to previous studies,  
417 participants in our experiment did not engage in any explicit planning process. As mentioned before,  
418 participants were not instructed to learn about any sequentiality in the task. Moreover, participants  
419 were only told that short pauses may occur during the task, but they were not informed about the  
420 purpose of these pauses, and could not predict when the pauses would occur. It therefore seems likely  
421 that neural representations during on-task pauses reflect ongoing task representations similar to theta  
422 sequences in rodents.

423 One important aspect of our work is that we focused on cortical replay of predictive representations  
424 in visual (occipito-temporal) and sensorimotor (pre- and postcentral gyri) cortex. Previous work has  
425 largely focused on the hippocampus as a site of replay and as a potential brain region to host predictive  
426 cognitive maps (Garvert et al., 2017; Stachenfeld et al., 2017), while other studies have also emphasized  
427 the role of the prefrontal cortex (PFC) (Wilson et al., 2014; Schuck et al., 2016; Badre and Nee, 2018).  
428 Several fMRI studies demonstrated that hippocampal activity is modulated by stimulus predictability  
429 in sequential learning tasks (Strange et al., 2005; Harrison et al., 2006; Bornstein and Daw, 2012) and  
430 is related to the reinstatement of cortical task representations in visual cortex (Bosch et al., 2014;  
431 Hindy et al., 2016; Kok and Turk-Browne, 2018). Replay is known to occur throughout the brain (see  
432 e.g., Foster, 2017) but the functions of distributed replay events still remain to be further illuminated.  
433 Our findings shed light on the distribution of predictive representations and replay in the human brain,  
434 and suggest a potential involvement of sensory and motor areas. Yet, which roles the hippocampus  
435 and PFC play in this process remains an open question.

436 Our results suggest that participants formed a predominantly bidirectional representation of the  
437 ring-like graph structure, irrespective of the order in which the two graphs were experienced. The  
438 influence of node distance on response times was more pronounced and the predictive horizon in  
439 SR-based analyses was deeper in bidirectional compared to unidirectional behavioral data. Post-task  
440 ratings of transition probabilities were biased by bidirectional node distance, irrespective of graph  
441 order. The reversal in the directionality of classifier probabilities from early to late TRs, which is  
442 characteristic for sequential neural events in fMRI data (cf. Wittkuhn and Schuck, 2021), was only  
443 observed in on-task intervals during bidirectional but not unidirectional graph trials. This dominance

444 of a bidirectional representation could reflect that transitions in clockwise order in the unidirectional  
445 graph (e.g., from  $A$  to  $B$ ; Fig. 2) still allow to infer an associative relationship in the reverse direction  
446 (i.e., from  $B$  to  $A$ ), even though this transition actually never occurs during the task.

447 One remaining challenge for future research is to better understand the sequentiality of replay. We  
448 have previously shown that, at the level of classifier probabilities, sequences of neural events first elicit  
449 forward followed by backward sequentiality relative to the true sequence of events due to the dynamics  
450 of the HRF (Wittkuhn and Schuck, 2021). The fact that we found backward sequentiality in earlier  
451 TRs relative to an assumed sequential ordering of classifier probabilities in line with the unidirectional  
452 graph structure suggests that the true sequence of neural events at the start of the on-task intervals  
453 was indeed backwards. In the bidirectional graph structure, however, sequences can be expected in  
454 both directions, i.e.,  $A-B-C-D-E$  and  $E-D-C-B-A$  sequences are both very likely. It therefore remains  
455 unclear whether detecting a replayed sequence of  $A-B-C-D-E$  reflects forward replay of this sequence  
456 or backward replay of its reverse ( $E-D-C-B-A$ ). Previous research has found awake replay in both  
457 forward and backward order in rodents (Foster and Wilson, 2006; Diba and Buzsáki, 2007; Gupta  
458 et al., 2010) as well as in humans (Liu et al., 2021), and suggested that the directionality of replay  
459 may be tied to different functions, such as memory consolidation vs. value learning (e.g., Foster and  
460 Wilson, 2006; Ólafsdóttir et al., 2018; Liu et al., 2019; Wittkuhn et al., 2021). Neural sequences that  
461 have been associated with a prospective planning function are typically in forward order relative to the  
462 experienced sequence (Johnson and Redish, 2007; van der Meer and Redish, 2009; Pfeiffer and Foster,  
463 2013; Wikenheiser and Redish, 2015b). However, as others have pointed out before (Kurth-Nelson  
464 et al., 2016), it is plausible to plan backward instead of forward (also see LaValle, 2006), and previous  
465 studies also reported backward sequences during theta in rodents (Wang et al., 2020) as well as during  
466 value learning in humans (Liu et al., 2021).

467 Another challenge will be to better understand the relation between changes in neural representa-  
468 tions and replay. Repeated exposure to sequences of stimuli has been shown to increase the similarity  
469 of neural stimulus representations in the medial temporal lobe (MTL) in both macaques (Miyashita,  
470 1988) and humans (Schapiro et al., 2012). Using fMRI adaptation (cf. Barron et al., 2016), Garvert  
471 et al. (2017) showed that the similarity of neural representations of task stimuli decreases with distance  
472 between stimuli in a graph structure. This may pose a challenge to classifiers trained on individual  
473 stimulus presentations as in the current study, because increases in the similarity of neural represen-  
474 tations could increase the confusability of decoded patterns, which in turn may cause biases in the  
475 measured sequentiality.

476 In conclusion, our results provide insights into how the human brain forms predictive represen-  
477 tations of the structural relationships in the environment from continuous experience and samples  
478 sequences from these internal cognitive maps during on-task replay.

## 479 **Methods**

### 480 **Participants**

481 44 young and healthy adults were recruited from an internal participant database or through local  
482 advertisement and fully completed the experiment. No statistical methods were used to predetermine  
483 the sample size but it was chosen to be larger than similar previous neuroimaging studies (e.g., [Schuck  
484 and Niv, 2019](#); [Momennejad et al., 2018](#); [Tambini and Davachi, 2013](#)). Five participants were excluded  
485 from further analysis because they viewed different animals in session 1 and 2 due to a programming  
486 error in the behavioral task. Thus, the final sample consisted of 39 participants (mean age = 24.28  
487 years,  $SD = 4.24$  years, age range: 18 - 33 years, 23 female, 16 male). All participants were screened  
488 for MRI eligibility during a telephone screening prior to participation and again at the beginning  
489 of each study session according to standard MRI safety guidelines (e.g., asking for metal implants,  
490 claustrophobia, etc.). None of the participants reported to have any major physical or mental health  
491 problems. All participants were required to be right-handed, to have corrected-to-normal vision,  
492 and to speak German fluently. The ethics commission of the German Psychological Society (DGPs)  
493 approved the study protocol (reference number: SchuckNicolas2020-06-22VA). All volunteers gave  
494 written informed consent prior to the beginning of the experiments. Every participant received 70.00  
495 Euro and a performance-based bonus of up to 5.00 Euro upon completion of the study. None of the  
496 participants reported to have any prior experience with the stimuli or the behavioral task.

### 497 **Task**

### 498 **Stimuli**

499 All visual stimuli were taken from a set of colored and shaded images commissioned by [Rossion  
500 and Pourtois \(2004\)](#), which are loosely based on images from the original Snodgrass and Vanderwart  
501 set ([Snodgrass and Vanderwart, 1980](#)). The images are freely available on the internet at <https://sites.google.com/andrew.cmu.edu/tarrlab/resources/tarrlab-stimuli> under the terms of  
502 the Creative Commons Attribution-NonCommercial-ShareAlike 3.0 Unported license (for details, see  
503 <https://creativecommons.org/licenses/by-nc-sa/3.0/>) and have been used in similar previous  
504 studies (e.g., [Garvert et al., 2017](#)). Stimulus images courtesy of Michael J. Tarr at Carnegie Mellon Uni-  
505 versity, (for details, see <http://www.tarrlab.org/>). In total, we selected 24 images which depicted  
506 animals that could be expected in a public zoo. Specifically, the images depicted a bear, a dromedary,  
507 a deer, an eagle, an elephant, a fox, a giraffe, a goat, a gorilla, a kangaroo, a leopard, a lion, an ostrich,  
508 a peacock, a penguin, a raccoon, a rhinoceros, a seal, a skunk, a swan, a tiger, a turtle, and a  
509 zebra (in alphabetical order). For each participant, six task stimuli were randomly selected from the  
510 set of 24 the animal images and each image was randomly assigned to one of six response buttons. This  
511 randomization ensured that any potential systematic differences between the stimuli (e.g., familiarity,  
512 preference, or ability to decode) would not influence the results on a group level (for a similar reasoning,  
513 see e.g., [Liu et al., 2021](#)). Cages were represented by a clipart illustration of a black fence which is freely  
514 available from <https://commons.wikimedia.org/wiki/File:Maki-fence-15.svg>, open-source and  
515 licensed under the Creative Commons CC0 1.0 Universal Public Domain Dedication, allowing further  
516 modification (for details, see <https://creativecommons.org/publicdomain/zero/1.0/>). When  
517 feedback was presented in the training and recall task conditions, correct responses were indicated  
518 by a fence colored in green and incorrect responses were signaled by a fence colored in red. The color  
519

520 of the original image was modified accordingly. All stimuli were presented against a white background.

## 521 **Hardware and software**

522 Behavioral responses were collected using two 4-button inline fiber optic response pads (Current  
523 Designs, Philadelphia, PA, USA), one for each hand, with a linear arrangement of four buttons (buttons  
524 were colored in blue, yellow, green, and red, from left to right). The two response pads were attached  
525 horizontally to a rectangular cushion that was placed in participants' laps such that they could place  
526 their fingers on the response buttons with arms comfortably extended while resting on the scanner  
527 bed. Participants were asked to place their index, middle, and ring finger of their left and right  
528 hand on the yellow, green, and red buttons of the left and right response pads, respectively. The  
529 fourth (blue) button on each response pad was masked with tape and participants were instructed to  
530 never use this response button. Behavioral responses on the response pads were transferred to the  
531 computer running the experimental task and mapped to the keyboard keys **z**, **g**, **r** and **w**, **n**, **d** for  
532 the left and right hand, respectively. The task was programmed in PsychoPy3 (version 3.0.11; [Peirce,](#)  
533 [2007, 2008](#); [Peirce et al., 2019](#)) and run on a Windows 7 computer with a monitor refresh-rate of 16.7  
534 ms. We recorded the presentation time stamps of all task events (onsets of all presentations of the  
535 fixation, stimulus, SRI, response, feedback, and ITI events) and confirmed that all components of the  
536 experimental task procedure were presented as expected.

## 537 **Instructions**

538 After participants entered the MRI scanner during the first study session and completed an anatomical  
539 T1-weighted (T1w) scan and a 5 min fMRI resting-state scan, they read the task instructions while  
540 lying inside the MRI scanner (for an illustration of the study procedure, see Fig. [S1](#)). Participants  
541 were asked to read all task instructions carefully (for the verbatim instructions, see Boxes [S1](#) to [S15](#)).  
542 They were further instructed to clarify any potential questions with the study instructor right away  
543 and to lie as still and relaxed as possible for the entire duration of the MRI scanning procedure. As  
544 part of the instructions, participants were presented with a cover story in order to increase motivation  
545 and engagement (see Box [S1](#)). Participants were told to see themselves in the role of a zookeeper in  
546 training whose main task is to ensure that all animals are in the correct cages. In all task conditions,  
547 participants were asked to always keep their fingers on the response buttons to be able to respond as  
548 quickly and as accurately as possible. The full task instructions can be found in the supplementary  
549 information (SI), translated to English (see SI, starting on page [7](#), Boxes [S1](#) to [S15](#)) from the original  
550 in German (see SI, page [11](#)).

## 551 **Training trials**

552 After participants read the instructions and clarified all remaining questions with the study instructors  
553 via the intercom, they completed the *training* phase of the task. The training condition was designed  
554 to explicitly teach participants the assignment of stimuli to response buttons. Each of the six animal  
555 stimuli selected per participant was randomly assigned to one of six response buttons. For the training  
556 condition, participants were told to see themselves in the role of a zookeeper in training in a public zoo  
557 whose task is to learn which animal belongs in which cage (see Box [S1](#)). During each trial, participants  
558 saw six black cages at the bottom of the screen with each cage belonging to one of the six animals.  
559 On each trial, an animal appeared above one of the six cages. Participants were tasked to press the

560 response button for that cage as fast and accurately as possible and actively remember the cage where  
561 the animal belonged (see Box S3 and Box S4). The task instructions emphasized that it would be very  
562 important for participants to actively remember which animal belonged in which cage and that they  
563 would have the chance to earn a higher bonus if they learned the assignment and responded accurately  
564 (see Box S5).

565 In total, participants completed 30 trials of the training condition. Across all trials, the pairwise  
566 ordering of stimuli was set to be balanced, with each pairwise sequential combination of stimuli  
567 presented exactly once, i.e., with  $n = 6$  stimuli, this resulted in  $n * (n - 1) = 6 * (6 - 1) = 30$  trials.  
568 In this sense, the stimulus order was drawn from a graph with all nodes connected to each other  
569 and an equal probability of  $p_{ij} = 0.2$  of transitioning from one node to any other node in the graph.  
570 This pairwise balancing of sequential combinations was used to ensure that participants would not  
571 learn any particular sequential order among the stimuli. Note, that this procedure only controlled for  
572 sequential order between pairs of consecutive stimuli but not higher-order sequential ordering of two  
573 steps or more.

574 On the first trial of the training condition, participants first saw a small black fixation cross that  
575 was displayed centrally on the screen for a fixed duration of 300 ms and signaled the onset of the  
576 following stimulus. The fixation cross was only shown on the first trial of the training phase, to allow  
577 for a short preparation signal before stimulus presentation began. Following the fixation cross, one of  
578 the animals was presented in the upper half of the screen above one of six cages that referred to the  
579 six response buttons and were presented in the lower half of the screen. The stimuli were shown for a  
580 fixed duration of 800 ms which was also the maximum time allowed for participants to respond. Note,  
581 that the instructions told participants that they would have 1 s to respond (see Box S4), an actual  
582 difference of 200 ms that was likely hardly noticeable. Following the stimulus, participants always  
583 received feedback that was shown for a fixed duration of 500 ms. If participants responded correctly,  
584 the cage corresponding to the correctly pressed response button, was shown in green. If participants  
585 did not respond correctly, the cage referring to the correct response button was shown in green and the  
586 cage referring to the incorrectly pressed response button was shown in red. If participants responded  
587 too late, the cage referring to the correct response button was shown in green and the German words  
588 “Zu langsam” (in English: “Too slow”) appeared in large red letters in the upper half of the screen.  
589 Finally, a small black fixation cross was shown during an ITI with a variable duration of  $M = 1500$   
590 ms. The ITIs were drawn from a truncated exponential distribution with a mean of  $M = 1.5$  s, a  
591 lower bound of  $x_1 = 1.0$  s and an upper bound of  $x_2 = 10.0$  s. To this end, we used the `truncexpon`  
592 distribution from the `SciPy` package (Virtanen et al., 2020) implemented in Python 3 (Van Rossum  
593 and Drake, 2009). The `truncexpon` distribution is described by three parameters, the shape  $b$ , the  
594 location  $\mu$  and the scale  $\beta$ . The support of the distribution is defined by the lower and upper bounds,  
595  $[x_1, x_2]$ , where  $x_1 = \mu$  and  $x_2 = b * \beta + \mu$ . We solved the latter equation for the shape  $b$  to get  
596  $b = (x_2 - x_1)/\beta$ . We chose the scale parameter  $\beta$  such that the mean of the distribution would be  
597  $M = 2.5$ . To this end, we applied `scipy.optimize.fsolve` (Virtanen et al., 2020) to a function of  
598 the scale  $\beta$  that becomes zero when  $truncexpon.mean((x_2 - x_1)/\beta, \mu, \beta) - M = 2.5$ . In total, the  
599 training phase took approximately 2 min to complete.

## 600 Recall trials

601 After participants finished the training phase of the task in the first experimental session, they com-  
602 pleted eight runs of the *recall* condition and another ninth run at the beginning of the second session

603 (for an illustration of the study procedure, see Fig. S1). The recall condition of the task mainly served  
604 two purposes: First, the recall condition was used to further train participants on the associations  
605 between animal stimuli and response keys. Second, the recall condition was designed to elicit object-  
606 specific neural activation patterns of the presented visual animal stimuli and the following motor  
607 response. The resulting neural activation patterns were later used to train the probabilistic classifiers.  
608 The cover story of the instructions told participants that they would be tested on how well they have  
609 learned the association between animals and response keys during the training phase (see Box S6).

610 In total, participants completed nine runs of the recall condition. Eight runs were completed during  
611 session 1 and an additional ninth run was completed at the beginning of session 2 in order to remind  
612 participants about the S-R mappings (for an illustration of the study procedure, see Fig. S1). Each  
613 run consisted of 60 trials. As in the training phase, the proportion of pairwise sequential combinations  
614 of stimuli was balanced within a run. Across all trials, each pairwise sequential combination of stimuli  
615 was presented twice, i.e., with  $n = 6$  stimuli, this results in  $n * (n - 1) * 2 = 6 * (6 - 1) * 2 = 60$   
616 trials. As for the training trials, the sequential ordering of stimuli was drawn from a graph with all  
617 nodes connected to each other and an equal probability of  $p_{ij} = 0.2$  of transitioning from one node  
618 to any other node in the graph. With 60 trials per run, each of the six animal stimuli was shown  
619 10 times per run. Given nine runs of the recall condition in total, this amounted to a maximum of  
620 90 trials per stimulus per participant of training examples for the classifiers. Including a ninth run  
621 at the beginning of session 2 offered two advantages. First, participants were reminded about the  
622 associations between the stimuli and response keys that they had learned extensively during session 1.  
623 Second, the ninth run allowed to investigate decoding performance across session boundaries. Note,  
624 that the two experimental sessions were separated by about one week. Although the pre-processing  
625 of fMRI data (for details, see section on fMRI pre-processing below) should align the data of the two  
626 sessions, remaining differences between the two sessions (e.g., positioning of the participant in the MRI  
627 scanner) could lead to a decrement in decoding accuracy when testing classifiers that were trained  
628 on session 1 data to data from session 2. Our decoding approach was designed such that pattern  
629 classifiers would be mainly trained on neural data from recall trials in session 1 but then applied to  
630 data from session 2.

631 As in training trials, the first trial of each run in the recall phase started with a black fixation  
632 cross on a white background that was presented for a fixed duration of 300 ms. Only the first trial of  
633 a run contained a fixation cross, to provide a preparatory signal for participants which would later be  
634 substituted for by the ITI. Participants were then presented with one of the six animal stimuli that  
635 was presented centrally on the screen for a fixed duration of 500 ms. Participants were instructed  
636 to not respond to the stimulus (see instructions in Box S7). To check if participants indeed did not  
637 respond during the stimulus or the following SRI, we also recorded responses during these trial events.  
638 During the breaks between task runs, participants received feedback about the proportion of trials  
639 on which they responded too early. If participants responded too early, they were reminded by the  
640 study instructors to not respond before the response screen. A variable SRI followed the stimulus  
641 presentation during which a fixation cross was presented again. Including a jittered SRI ensured that  
642 the neural responses to the visual stimulus and the motor response could be separated in time and  
643 reduce temporal autocorrelation. Following the SRI, the cages indicating the response buttons were  
644 displayed centrally on the screen for a fixed duration of 800 ms, which was also the response time  
645 limit for participants. If participants responded incorrectly, the cage referring to the correct response  
646 button was shown in green and the cage referring to the incorrectly pressed response key was shown

647 in red. If participants responded too late, the cage referring to the correct response button was shown  
648 in green and the German words “Zu langsam” (in English: “Too slow”) appeared in large red letters  
649 in the upper half of the screen. If participants responded correctly, the feedback screen was skipped.  
650 Each trial ended with an ITI with a variable duration of  $M = 2.5$  s. Both SRIs and ITIs were drawn  
651 from a truncated exponential distribution as on training trials (for details, see description of training  
652 trials above).

## 653 Graph trials

654 Following the ninth run of the recall condition in session 2, participants completed five runs of the *graph*  
655 condition (for an illustration of the study procedure, see Fig. S1). During graph trials, participants  
656 were exposed to a fast-paced stream of the same six animal stimuli as in the training and recall phase.  
657 Unbeknownst to participants, the sequential ordering of animal stimuli followed particular transition  
658 probabilities.

659 During the graph task, the sequential order of stimuli across trials was determined by two graph  
660 structures with distinct transition probabilities. In the first graph structure, each node had a high  
661 probability ( $p_{ij} = 0.7$ ) of transitioning to the next neighboring (i.e., transitioning from  $A$  to  $B$ ,  $B$  to  
662  $C$ ,  $C$  to  $D$ ,  $D$  to  $E$ ,  $E$  to  $F$ , and  $F$  to  $A$ ). Transitions to all other nodes (except the previous node)  
663 happened with equal probability of 0.1. Transitions to the previous node never occurred (transition  
664 probability of  $p_{ij} = 0.0$ ). These transition probabilities resulted in a sequential ordering of stimuli  
665 that can be characterized by a continuous progression in a unidirectional (i.e., clockwise) order around  
666 the ring-like graph structure. We therefore termed this graph structure the *unidirectional graph*  
667 (or *uni* in short). The second graph structure allowed sequential ordering that could also progress  
668 in counterclockwise order. To this end, stimuli were now equally likely to transition to the next  
669 neighboring but also the previous node (probability of  $p_{ij} = 0.35$ , i.e., splitting up the probability of  
670  $p_{ij} = 0.7$  of transitioning to the next neighboring node only in the unidirectional graph structure). As  
671 in the unidirectional graph, transitions to all other nodes happened with equal probability of  $p_{ij} = 0.1$ .  
672 Given that stimuli could follow a sequential ordering in both directions of the ring, we refer to this  
673 graph structure as the *bidirectional graph* (or *bi* in short).

674 Participants completed five runs of the graph task condition. Each run consisted of 240 trials.  
675 Each stimulus was shown 40 times per run. In the unidirectional graph, for each stimulus the most  
676 likely transitions (probability of  $p_{ij} = 0.7$ ) to the next neighboring node occurred 28 times per partic-  
677 ipant. Per stimulus and participant, 4 transitions to the other three possible nodes (low probability  
678 of  $p_{ij} = 0.1$ ) happened. No transitions to the previous node happened when stimulus transitions were  
679 drawn from a unidirectional graph structure. Together, this resulted in  $28 + 4 * 3 = 40$  presentations  
680 per stimulus, run and participant. For the bidirectional graph structure, transitions to the next neigh-  
681 boring and the previous node occurred 14 times per stimulus and to all other nodes 4 times as for  
682 the unidirectional graph structure. Together, this resulted in  $14 + 14 + 4 * 3 = 40$  presentations per  
683 stimulus, run and participant.

684 As for the other task conditions, only the first trial of the graph phase started with the presentation  
685 of a small black fixation cross that was presented centrally on the screen for a fixed duration of 300  
686 ms. Then, an animal stimulus was presented centrally on the screen for a fixed duration of 800 ms,  
687 which also constituted the time limit in which participants could respond with the correct response  
688 button. Participants did not receive feedback during the graph phase of the task in order to avoid any  
689 influence of feedback on graph learning. The stimulus was followed by an ITI with a mean duration



690 of 750 ms. The ITI in the graph trial phase was also drawn from a truncated exponential distribution  
691 with a mean of  $M = 750$  ms, a lower bound of  $x_1 = 500$  ms and an upper bound of  $x_2 = 5000$  ms.

692 Importantly, during the graph task, we also included long ITIs of 10 s in order to investigate  
693 on-task replay. As stated above, participants completed 240 trials of the main task per run. In each  
694 run, each stimulus was shown on a total of 40 trials. For each stimulus, every 10<sup>th</sup> trial on average  
695 was selected to be followed by a long ITI of 10 s. This meant that in each of the five main task runs,  
696 4 trials per stimulus were followed by a long ITI. In total, each participant experienced 24 long ITI  
697 trials per run and 120 long ITI trials across the entire experiment. The duration of 10 s (roughly  
698 corresponding to eight TRs at a repetition time (TR) of 1.25 s) was chosen based on our previous  
699 results showing that the large majority of sequential fMRI signals can be captured within this time  
700 period (cf. [Wittkuhn and Schuck, 2021](#), their Fig. 3).

## 701 Post-task questionnaire

702 After participants left the scanner in session 2, they were asked to complete a computerized post-task  
703 questionnaire consisting of four parts. First, participants were asked to report their handedness by  
704 selecting from three alternative options, “left”, “right” or “both”, in a forced-choice format. Note,  
705 that participants were required to be right-handed to participate in the study, hence this question  
706 merely served to record the self-reported handedness in addition to the participant details acquired  
707 as part of the recruitment procedure and demographic questionnaire assessment. Second, participants  
708 were asked whether they noticed any sequential order among the animal stimuli in the main task and  
709 could respond either “yes” or “no” in a forced-choice format. Third, if participants indicated that they  
710 noticed a sequential order of the stimuli (selecting “yes” on the previous question), they were asked  
711 to indicate during which run of the main task they had started to notice the ordering (selecting from  
712 run “1” to “5”). In case participants indicated that they did not notice a sequential ordering, they  
713 were asked to select “None” when asked about the run. Fourth, participants were presented with all  
714 sequential combinations of pairs of the animal stimuli and asked to indicate how likely animal A (on  
715 the left) was followed by animal B (on the right) during the Main condition of the task. Participants  
716 were instructed to follow their gut feeling in case they were uncertain about the probability ratings.  
717 With  $n = 6$  stimuli, this resulted in  $n * (n - 1) = 6 * (6 - 1) = 30$  trials. Participants indicated their  
718 response using a slider on a continuous scale from 0% to 100%. We recorded participants probability  
719 rating and response time on each trial. There was no time limit for any of the assessments in the  
720 questionnaire. Participants took  $M = 5.49$  min ( $SD = 2.38$  min; range: 2.23 to 12.63 min) to complete  
721 the questionnaire. The computerized questionnaire was programmed in PsychoPy3 (version 3.0.11;  
722 [Peirce, 2007, 2008; Peirce et al., 2019](#)) and run on the same Windows 7 computer that was used for  
723 the main experimental task.

## 724 Study procedure

725 All participants were screened for study and MRI eligibility during a telephone screening prior to  
726 participation. The study consisted of two experimental sessions. Upon arrival at the study center in  
727 both sessions, participants were first asked about any symptoms that could indicate an infection with  
728 the SARS-CoV-2 virus. The study instructors then measured participants’ body temperature which  
729 was required to not be higher than 37.5°C. Participants were asked to read and sign all the relevant  
730 study documents at home prior to their arrival at the study center.

731 **Session 1** The first MRI session started with a short localizer sequence of ca. 1 min during which  
732 participants were asked to rest calmly, close their eyes and move as little as possible. Once the  
733 localizer data was acquired, the study personnel aligned the field of view (FOV) for the acquisition  
734 of the T1w sequence. The acquisition of the T1w sequence took about 4 min to complete. Using the  
735 anatomical precision of the T1w images, the study personnel then aligned the FOV of the functional  
736 MRI sequences. Here, the lower edge of the FOV was first aligned to the visually identified anterior  
737 commissure - posterior commissure (AC-PC) line of the participant's brain. The FOV was then  
738 manually tilted by 20 degrees forwards relative to the rostro-caudal axis (positive tilt; for details see  
739 the section on "[MRI data acquisition](#)" on page 26). Shortly before the functional MRI sequences  
740 were acquired, we performed Advanced Shimming. During the shimming period, which took ca. 2  
741 min, participants were again instructed to move as little as possible and additionally asked to avoid  
742 swallowing to further reduce any potential movements. Next, we acquired functional MRI data during  
743 a resting-state period of 5 min. For this phase, participants were instructed to keep their eyes open  
744 and fixate a white fixation cross that was presented on a black background. Acquiring fMRI resting-  
745 state data before participants had any exposure to the task allowed us to record a resting-state period  
746 that was guaranteed to be free of any task-related neural activation or reactivation. Following this  
747 pre-task resting-state scan, participants read the task instructions inside the MRI scanner and were  
748 able to clarify any questions with the study instructions via the intercom system. Participants then  
749 performed the training phase of the task (for details, see the section "[Training trials](#)" on page 21)  
750 while undergoing acquisition of functional MRI data. The training phase took circa 2 min to complete.  
751 Following the training phase, participants performed eight runs of the recall phase of the task of circa 6  
752 min each while fMRI data was recorded. Before participants left the scanner, field maps were acquired.

753 **Session 2** At the beginning of the second session, participants first completed the questionnaire for  
754 MRI eligibility and the questionnaire on COVID-19 symptoms before entering the MRI scanner again.  
755 As in the first session, the second MRI session started with the acquisition of a short localizer sequence  
756 and a T1w sequence followed by the orientation of the FOV for the functional acquisitions and the  
757 Advanced Shimming. Participants were asked to rest calmly and keep their eyes closed during this  
758 period. Next, during the first functional sequence of the second study session, participants performed  
759 a ninth run of the recall phase of the task in order to remind them about the correct response buttons  
760 associated with each of the six stimuli. We then acquired functional resting-state scans of 3 min each  
761 and functional task scans of 10 min each in an interleaved fashion, starting with a resting-state scan.  
762 During the acquisition of functional resting-state data, participants were asked to rest calmly and  
763 fixate a small white cross on a black background that was presented on the screen. During each of  
764 the functional task scans, participants performed the graph learning phase of the task (for details, see  
765 section "[Graph trials](#)" on page 24). Importantly, half-way through the third block of the main task, the  
766 graph structure was changed without prior announcement towards the second graph structure. After  
767 the sixth resting-state acquisition, field maps were acquired and participants left the MRI scanner.

## 768 **MRI data acquisition**

769 All MRI data were acquired using a 32-channel head coil on a research-dedicated 3-Tesla Siemens  
770 Magnetom TrioTim MRI scanner (Siemens, Erlangen, Germany) located at the Max Planck Institute  
771 for Human Development in Berlin, Germany.

772 At the beginning of each of the two MRI recording sessions, high-resolution T1w anatomical Mag-

773 netization Prepared Rapid Gradient Echo (MPRAGE) sequences were obtained from each participant  
774 to allow co-registration and brain surface reconstruction (sequence specification: 256 slices; TR =  
775 1900 ms; echo time (TE) = 2.52 ms; flip angle (FA) = 9 degrees; inversion time (TI) = 900 ms; matrix  
776 size = 192 x 256; FOV = 192 x 256 mm; voxel size = 1 x 1 x 1 mm).

777 For the functional scans, whole-brain images were acquired using a segmented k-space and steady  
778 state T2\*-weighted multi-band (MB) echo-planar imaging (EPI) single-echo gradient sequence that is  
779 sensitive to the blood-oxygen-level dependent (BOLD) contrast. This measures local magnetic changes  
780 caused by changes in blood oxygenation that accompany neural activity (sequence specification: 64  
781 slices in interleaved ascending order; anterior-to-posterior (A-P) phase encoding direction; TR = 1250  
782 ms; TE = 26 ms; voxel size = 2 x 2 x 2 mm; matrix = 96 x 96; FOV = 192 x 192 mm; FA = 71  
783 degrees; distance factor = 0%; MB acceleration factor 4). Slices were tilted for each participant by 20  
784 degrees forwards relative to the rostro-caudal axis (positive tilt) to improve the quality of fMRI signal  
785 from the hippocampus (cf. Weiskopf et al., 2006) while preserving good coverage of occipito-temporal  
786 and motor brain regions. The same sequence parameters were used for all acquisitions of fMRI data.  
787 For each functional task run, the task began after the acquisition of the first four volumes (i.e., after  
788 5.00 s) to avoid partial saturation effects and allow for scanner equilibrium.

789 The first MRI session included nine functional task runs in total (for the study procedure, see  
790 Fig. S1). After participants read the task instructions inside the MRI scanner, they completed the  
791 training trials of the task which explicitly taught participants the correct mapping between stimuli  
792 and response keys. During this task phase, 80 volumes of fMRI were collected, which were not used  
793 in any further analysis. The other eight functional task runs during session 1 consisted of eight runs  
794 of the recall condition. Each run of the recall task was about 6 min in length, during which 320  
795 functional volumes were acquired. We also recorded two functional runs of resting-state fMRI data,  
796 one before and one after the task runs. Each resting-state run was about 5 min in length, during  
797 which 233 functional volumes were acquired.

798 The second MRI session included six functional task runs in total (for the study procedure, see  
799 Fig. S1). After participants entered the MRI scanner, they completed a ninth run of the recall task.  
800 As before, this run of the recall task was also about 6 min in length, during which 320 functional  
801 volumes were acquired. Participants then completed five runs of the graph learning task. Each run of  
802 the five graph learning runs was about 10 min in length, during which 640 functional volumes were  
803 acquired. The five runs of the graph learning task were interleaved with six recordings of resting-state  
804 fMRI data, each about 3 min in length, during which 137 functional volumes were acquired.

805 At the end of each scanning session, two short acquisitions with six volumes each were collected  
806 using the same sequence parameters as for the functional scans but with varying phase encoding  
807 polarities, resulting in pairs of images with distortions going in opposite directions between the two  
808 acquisitions (also known as the *blip-up* / *blip-down* technique). From these pairs the displacement  
809 maps were estimated and used to correct for geometric distortions due to susceptibility-induced field  
810 inhomogeneities as implemented in the fMRIPrep preprocessing pipeline (Esteban et al., 2018) (see  
811 details below). In addition, a whole-brain spoiled gradient recalled (GR) field map with dual echo-time  
812 images (sequence specification: 36 slices; A-P phase encoding direction; TR = 400 ms; TE1 = 4.92  
813 ms; TE2 = 7.38 ms; FA = 60 degrees; matrix size = 64 x 64; FOV = 192 x 192 mm; voxel size = 3  
814 x 3 x 3.75 mm) was obtained as a potential alternative to the blip-up / blip-down method described  
815 above.

816 We also measured respiration during each scanning session using a pneumatic respiration belt as

817 part of the Siemens Physiological Measurement Unit (PMU). Pulse data could not be recorded as the  
818 recording device could not be attached to the participants' index finger as it would have otherwise  
819 interfered with the motor responses.

## 820 MRI data preparation

821 **Conversion of data to the brain imaging data structure (BIDS) standard** The majority  
822 of the steps involved in preparing and preprocessing the MRI data employed recently developed tools  
823 and workflows aimed at enhancing standardization and reproducibility of task-based fMRI studies  
824 (for a similar data processing pipeline, see e.g., [Esteban et al., 2019a](#); [Wittkuhn and Schuck, 2021](#)).  
825 Version-controlled data and code management was performed using `DataLad` (version 0.13.0; [Halchenko](#)  
826 [et al., 2019, 2021](#)), supported by the `DataLad` handbook ([Wagner et al., 2020](#)). Following success-  
827 ful acquisition, all study data were arranged according to the brain imaging data structure (BIDS)  
828 specification ([Gorgolewski et al., 2016](#)) using the `HeuDiConv` tool (version 0.8.0.2; freely available  
829 from <https://github.com/ReproNim/reproin> or <https://hub.docker.com/r/repronim/reproin>)  
830 in combination with the `ReproIn` heuristic ([Visconti di Oleggio Castello et al., 2020](#)) (version 0.6.0)  
831 that allows automated creation of BIDS data sets from the acquired Digital Imaging and Commu-  
832 nications in Medicine (DICOM) images. To this end, the sequence protocol of the MRI data ac-  
833 quisition was set up to conform with the specification required by the `ReproIn` heuristic (for details  
834 of the heuristic, see [https://github.com/nipy/heudiconv/blob/master/heudiconv/heuristics/](https://github.com/nipy/heudiconv/blob/master/heudiconv/heuristics/reproin.py)  
835 [reproin.py](#)). `HeuDiConv` was run inside a `Singularity` container ([Kurtzer et al., 2017](#); [Sochat et al.,](#)  
836 [2017](#)) that was built from the most recent version (at the time of access) of a `Docker` container (tag  
837 0.8.0.2), available from <https://hub.docker.com/r/repronim/reproin/tags>. DICOMs were con-  
838 verted to the NIfTI-1 format using `dcm2niix` (version 1.0.20190410GCC6.3.0; [Li et al., 2016](#)). In  
839 order to make personal identification of study participants unlikely, we eliminated facial features from  
840 all high-resolution structural images using `pydeface` (version 2.0.0; [Gulban et al., 2019](#), available  
841 from <https://github.com/poldracklab/pydeface> or [https://hub.docker.com/r/poldracklab/](https://hub.docker.com/r/poldracklab/pydeface)  
842 [pydeface](#)). `pydeface` ([Gulban et al., 2019](#)) was run inside a `Singularity` container ([Kurtzer et al.,](#)  
843 [2017](#); [Sochat et al., 2017](#)) that was built from the most recent version (at the time of access) of a `Docker`  
844 container (tag 37-2e0c2d), available from <https://hub.docker.com/r/poldracklab/pydeface/tags>  
845 and used `Nipype`, version 1.3.0-rc1 ([Gorgolewski et al., 2011, 2019](#)). During the process of convert-  
846 ing the study data to BIDS the data set was queried using `pybids` (version 0.12.1; [Yarkoni et al.,](#)  
847 [2019a,b](#)), and validated using the `bids-validator` (version 1.5.4; [Gorgolewski et al., 2020](#)). The  
848 `bids-validator` ([Gorgolewski et al., 2020](#)) was run inside a `Singularity` container ([Kurtzer et al.,](#)  
849 [2017](#); [Sochat et al., 2017](#)) that was built from the most recent version (at the time of access) of a  
850 `Docker` container (tag v1.5.4), available from <https://hub.docker.com/r/bids/validator/tags>.

851 **MRI data quality control** The data quality of all functional and structural acquisitions were  
852 evaluated using the automated quality assessment tool `MRIQC`, version 0.15.2rc1 (for details, see [Es-](#)  
853 [teban et al., 2017](#), and the `MRIQC` documentation, available at [https://mriqc.readthedocs.io/en/](https://mriqc.readthedocs.io/en/stable/)  
854 [stable/](#)). The visual group-level reports of the estimated image quality metrics confirmed that the  
855 overall MRI signal quality of both anatomical and functional scans was highly consistent across par-  
856 ticipants and runs within each participant.

## 857 MRI data preprocessing

858 Preprocessing of MRI data was performed using fMRIPrep 20.2.0 (long-term support (LTS) release;  
859 [Esteban et al., 2018, 2019b](#), RRID:SCR\_016216), which is based on Nipype 1.5.1 ([Gorgolewski et al.,  
860 2011, 2019](#), RRID:SCR\_002502). Many internal operations of fMRIPrep use Nilearn 0.6.2 ([Abraham  
861 et al., 2014](#), RRID:SCR\_001362), mostly within the functional processing workflow. For more details  
862 of the pipeline, see the section corresponding to workflows in fMRIPrep's documentation at [https:  
863 //fmriprep.readthedocs.io/en/latest/workflows.html](https://fmriprep.readthedocs.io/en/latest/workflows.html). Note, that version 20.2.0 of fMRIPrep  
864 is a long-term support (LTS) release, offering long-term support and maintenance for four years.

865 **Preprocessing of anatomical MRI data using fMRIPrep** A total of two T1w images were found  
866 within the input BIDS data set, one from each study session. All of them were corrected for inten-  
867 sity non-uniformity (INU) using `N4BiasFieldCorrection` ([Tustison et al., 2010](#)), distributed with  
868 Advanced Normalization Tools (ANTs) 2.3.3 ([Avants et al., 2008](#), RRID:SCR\_004757). The T1w-  
869 reference was then skull-stripped with a Nipype implementation of the `antsBrainExtraction.sh`  
870 workflow (from ANTs), using `OASIS30ANTs` as target template. Brain tissue segmentation of cere-  
871 brospinal fluid (CSF), white-matter (WM) and gray-matter (GM) was performed on the brain-  
872 extracted T1w using `fast` (FMRIB Software Library (FSL) 5.0.9, RRID:SCR\_002823, [Zhang et al.,  
873 2001](#)). A T1w-reference map was computed after registration of two T1w images (after INU-correction)  
874 using `mri_robust_template` (FreeSurfer 6.0.1, [Reuter et al., 2010](#)). Brain surfaces were reconstructed  
875 using `recon-all` (FreeSurfer 6.0.1, RRID:SCR\_001847, [Dale et al., 1999](#)), and the brain mask es-  
876 timated previously was refined with a custom variation of the method to reconcile ANTs-derived  
877 and FreeSurfer-derived segmentations of the cortical GM of Mindboggle (RRID:SCR\_002438, [Klein  
878 et al., 2017](#)). Volume-based spatial normalization to two standard spaces (MNI152NLin6Asym,  
879 MNI152NLin2009cAsym) was performed through nonlinear registration with `antsRegistration` (ANTs  
880 2.3.3), using brain-extracted versions of both T1w reference and the T1w template. The following  
881 templates were selected for spatial normalization: FSL's MNI ICBM 152 non-linear 6<sup>th</sup> Generation  
882 Asymmetric Average Brain Stereotaxic Registration Model ([Evans et al., 2012](#), RRID:SCR\_002823;  
883 TemplateFlow ID: MNI152NLin6Asym), ICBM 152 Nonlinear Asymmetrical template version 2009c  
884 ([Fonov et al., 2009](#), RRID:SCR\_008796; TemplateFlow ID: MNI152NLin2009cAsym).

885 **Preprocessing of functional MRI data using fMRIPrep** For each of the BOLD runs found per  
886 participant (across all tasks and sessions), the following preprocessing was performed. First, a refer-  
887 ence volume and its skull-stripped version were generated using a custom methodology of fMRIPrep.  
888 A B0-nonuniformity map (or fieldmap) was estimated based on two (or more) echo-planar imaging  
889 (EPI) references with opposing phase-encoding directions, with `3dQwarp` ([Cox and Hyde, 1997](#), AFNI  
890 20160207). Based on the estimated susceptibility distortion, a corrected echo-planar imaging (EPI)  
891 reference was calculated for a more accurate co-registration with the anatomical reference. The BOLD  
892 reference was then co-registered to the T1w reference using `bbregister` (FreeSurfer) which implements  
893 boundary-based registration ([Greve and Fischl, 2009](#)). Co-registration was configured with six degrees  
894 of freedom. Head-motion parameters with respect to the BOLD reference (transformation matrices,  
895 and six corresponding rotation and translation parameters) are estimated before any spatiotemporal  
896 filtering using `mcflirt` (FSL 5.0.9, [Jenkinson et al., 2002](#)). BOLD runs were slice-time corrected using  
897 `3dTshift` from AFNI 20160207 ([Cox and Hyde, 1997](#), RRID:SCR\_005927). The BOLD time-series  
898 were resampled onto the following surfaces (FreeSurfer reconstruction nomenclature): `fsnative`. The

899 BOLD time-series (including slice-timing correction) were resampled onto their original, native space  
900 by applying a single, composite transform to correct for head-motion and susceptibility distortions.  
901 These resampled BOLD time-series will be referred to as preprocessed BOLD in original space, or just  
902 preprocessed BOLD. The BOLD time-series were resampled into standard space, generating a prepro-  
903 cessed BOLD run in MNI152NLin6Asym space. First, a reference volume and its skull-stripped version  
904 were generated using a custom methodology of `fMRIPrep`. Several confounding time-series were calcu-  
905 lated based on the preprocessed BOLD: framewise displacement (FD), DVARS and three region-wise  
906 global signals. FD was computed using two formulations following [Power et al.](#) (absolute sum of  
907 relative motions, 2014) and [Jenkinson et al.](#) (relative root mean square displacement between affines,  
908 2002). FD and DVARS are calculated for each functional run, both using their implementations in  
909 `Nipype` (following the definitions by [Power et al., 2014](#)). The three global signals are extracted within  
910 the CSF, the WM, and the whole-brain masks. Additionally, a set of physiological regressors were  
911 extracted to allow for component-based noise correction (`CompCor`, [Behzadi et al., 2007](#)). Principal  
912 components are estimated after high-pass filtering the preprocessed BOLD time-series (using a discrete  
913 cosine filter with 128s cut-off) for the two `CompCor` variants: temporal (`tCompCor`) and anatomical  
914 (`aCompCor`). `tCompCor` components are then calculated from the top 2% variable voxels within the  
915 brain mask. For `aCompCor`, three probabilistic masks (CSF, WM and combined CSF+WM) are gener-  
916 ated in anatomical space. The implementation differs from that of [Behzadi et al. \(2007\)](#) in that instead  
917 of eroding the masks by 2 pixels on BOLD space, the `aCompCor` masks are subtracted from a mask  
918 of pixels that likely contain a volume fraction of GM. This mask is obtained by dilating a GM mask  
919 extracted from the FreeSurfer’s `aseg` segmentation, and it ensures components are not extracted from  
920 voxels containing a minimal fraction of GM. Finally, the masks are resampled into BOLD space and  
921 binarized by thresholding at 0.99 (as in the original implementation). Components are also calculated  
922 separately within the WM and CSF masks. For each `CompCor` decomposition, the  $k$  components with  
923 the largest singular values are retained, such that the retained components’ time series are sufficient  
924 to explain 50 percent of variance across the nuisance mask (CSF, WM, combined, or temporal). The  
925 remaining components are dropped from consideration. The head-motion estimates calculated in the  
926 correction step were also placed within the corresponding confounds file. The confound time series  
927 derived from head motion estimates and global signals were expanded with the inclusion of temporal  
928 derivatives and quadratic terms for each ([Satterthwaite et al., 2013](#)). Frames that exceeded a threshold  
929 of 0.5 mm FD or 1.5 standardized DVARS were annotated as motion outliers. All resamplings can be  
930 performed with a single interpolation step by composing all the pertinent transformations (i.e. head-  
931 motion transform matrices, susceptibility distortion correction when available, and co-registrations  
932 to anatomical and output spaces). Gridded (volumetric) resamplings were performed using `antsAp-  
933 plyTransforms` (ANTs), configured with Lanczos interpolation to minimize the smoothing effects of  
934 other kernels ([Lanczos, 1964](#)). Non-gridded (surface) resamplings were performed using `mri_vol2surf`  
935 (`FreeSurfer`).

936 **Additional preprocessing of functional MRI data following `fMRIPrep`** Following preprocess-  
937 ing using `fMRIPrep`, the fMRI data were spatially smoothed using a Gaussian mask with a standard  
938 deviation (Full Width at Half Maximum (FWHM) parameter) set to 4 mm using an example `Nipype`  
939 smoothing workflow (see the [Nipype documentation](#) for details) based on the Smallest Univalued Seg-  
940 ment Assimilating Nucleus (SUSAN) algorithm as implemented in FSL ([Smith and Brady, 1997](#)). In  
941 this workflow, each run of fMRI data is separately smoothed using FSL’s SUSAN algorithm with the

942 brightness threshold set to 75% of the median value of each run and a mask constituting the mean  
943 functional image of each run.

## 944 Multi-variate fMRI pattern analysis

945 All fMRI pattern classification analyses were conducted using the open-source Python (Python Soft-  
946 ware Foundation, Python Language Reference, version 3.8.6) packages `Nilearn` (version 0.7.0; [Abra-  
947 ham et al., 2014](#)) and `scikit-learn` (version 0.24.1; [Pedregosa et al., 2011](#)). In all classification  
948 analyses, we trained an ensemble of six independent classifiers, one for each of the six event classes.  
949 Depending on the analysis, these six classes either referred to the identity of the six visual animal  
950 stimuli or the identity of the participant’s motor response, when training the classifiers with respect  
951 to the stimulus or the motor onset, respectively. For each class-specific classifier, labels of all other  
952 classes in the data were relabeled to a common “other” category. In order to ensure that the classifier  
953 estimates were not biased by relative differences in class frequency in the training set, the weights  
954 associated with each class were adjusted inversely proportional to the class frequencies in each train-  
955 ing fold. Given that there were six classes to decode, the frequencies used to adjust the classifiers’  
956 weights were  $\frac{1}{6}$  for the class of interest, and  $\frac{5}{6}$  for the “other” class, comprising any other classes.  
957 Adjustments to minor imbalances caused by the exclusion of erroneous trials were performed in the  
958 same way. We used separate logistic regression classifiers with identical parameter settings. All classi-  
959 fiers were regularized using L2 regularization. The  $C$  parameter of the cost function was fixed at the  
960 default value of  $C = 1.0$  for all participants. The classifiers employed the `lbfgs` algorithm to solve the  
961 multi-class optimization problem and were allowed to take a maximum of 4,000 iterations to converge.  
962 Pattern classification was performed within each participant separately, never across participants. For  
963 each example in the training set, we added 4 s to the event onset and chose the volume closest to  
964 that time point (i.e., rounding to the nearest volume) to center the classifier training on the expected  
965 peaks of the BOLD response (for a similar approach, see e.g., [Deuker et al., 2013](#)). At a TR of 1.25  
966 s this corresponded roughly to the fourth MRI volume which thus compromised a time window of  
967 3.75 s to 5.0 s after each event onset. We detrended the fMRI data separately for each run across all  
968 task conditions to remove low frequency signal intensity drifts in the data due to noise from the MRI  
969 scanner. For each classifier and run, the features were standardized ( $z$ -scored) by removing the mean  
970 and scaling to unit variance separately for each training and test set.

971 **Classification procedures** First, in order to assess the ability of the classifiers to decode the correct  
972 class from fMRI patterns, we conducted a leave-one-run-out cross-validation procedure for which data  
973 from seven task runs of the recall phase in session 1 were used for training and data from the left-out  
974 run (i.e., the eighth run) from session 1 was used for testing the classification performance. This  
975 procedure was repeated eight times so that each task run served as the testing set once. Classifier  
976 training was performed on data from all correct recall trials of the seven runs in the respective cross-  
977 validation fold. In each iteration of the leave-one-run-out procedure, the classifiers trained on seven out  
978 of eight runs were then applied separately to the data from the left-out run. Specifically, the classifiers  
979 were applied to (1) data from the recall trials of the left-out run, selecting volumes capturing the  
980 expected activation peaks to determine classification accuracy, and (2) data from the recall trials of  
981 the left-out run, selecting all volumes from the volume closest to the stimulus or response onset and  
982 the next seven volumes to characterize temporal dynamics of probabilistic classifier predictions on a  
983 single trial basis.

984 Second, we assessed decoding performance on recall trials across the two experimental sessions.  
985 The large majority of fMRI data that was used to train the classifiers was collected in session 1 (eight of  
986 nine runs of the recall task), but the trained classifiers were mainly applied to fMRI data from session  
987 2 (i.e., on-task intervals during graph trials). At the beginning of the second experimental session,  
988 participants completed another run of the recall task (i.e., a ninth run; for the study procedure, see  
989 Fig. S1). This additional task run mainly served the two purposes of (1) reminding participants about  
990 the correct S-R mapping that they had learned in session 1, and (2) to investigate the ability of the  
991 classifiers to correctly decode fMRI patterns in session 2 when they were only trained on session 1  
992 data. This second aspect is crucial, as the main focus of investigation is the potential reactivation of  
993 neural task representations in session 2 fMRI data. Thus, it is important to demonstrate that this  
994 ability is not influenced by losses in decoding performance due to decoding across session boundaries.  
995 In order to test cross-session decoding, we thus trained the classifiers on all eight runs of the recall  
996 condition in session 1 and tested their decoding performance on the ninth run of the recall condition  
997 in session 2. Classifiers trained on data from all nine runs of the recall task were subsequently applied  
998 to data from on-task intervals in graph trials in session 2. For the classification analyses in on-task  
999 intervals of the graph task, classifiers were trained on the peak activation patterns from all correct  
1000 recall trials (including session 1 and session 2 data) and then tested on all TR corresponding to the  
1001 graph task ITIs.

1002 **Feature selection** All participant-specific anatomical masks were created based on automated  
1003 anatomical labeling of brain surface reconstructions from the individual T1w reference image cre-  
1004 ated with Freesurfer’s `recon-all` (Dale et al., 1999) as part of the `fMRIPrep` workflow (Esteban et al.,  
1005 2018), in order to account for individual variability in macroscopic anatomy and to allow reliable la-  
1006 beling (Fischl et al., 2004; Poldrack, 2007). For the anatomical masks of occipito-temporal regions we  
1007 selected the corresponding labels of the cuneus, lateral occipital sulcus, pericalcarine gyrus, superior  
1008 parietal lobule, lingual gyrus, inferior parietal lobule, fusiform gyrus, inferior temporal gyrus, parahip-  
1009 pocampal gyrus, and the middle temporal gyrus (cf. Haxby et al., 2001; Wittkuhn and Schuck, 2021).  
1010 For the anatomical ROI of motor cortex, we selected the labels of the left and right gyrus precentralis  
1011 as well as gyrus postcentralis. The labels of each ROI are listed in Table 1. Only gray-matter voxels  
1012 were included in the generation of the masks as BOLD signal from non-gray-matter voxels cannot be  
1013 generally interpreted as neural activity (Kunz et al., 2018). Note, however, that due to the whole-brain  
1014 smoothing performed during preprocessing, voxel activation from brain regions outside the anatomical  
1015 mask but within the sphere of the smoothing kernel might have entered the anatomical mask (thus,  
1016 in principle, also including signal from surrounding non-gray-matter voxels).

| ROI               | Freesurfer labels (brain region)                                                                                                                                                                                                                                                                                                                 |
|-------------------|--------------------------------------------------------------------------------------------------------------------------------------------------------------------------------------------------------------------------------------------------------------------------------------------------------------------------------------------------|
| Occipito-temporal | 1005, 2005 (cuneus); 1011, 2011 (lateral occipital sulcus); 1021, 2021 (pericalcarine gyrus); 1029, 2029 (superio parietal lobule); 1013, 2013 (lingual gyrus); 1008, 2008 (inferior parietal lobule); 1007, 2007 (fusiform gyrus); 1009, 2009 (inferior temporal gyrus); 1016, 2016 (parahippocampal gyrus); 1015, 2015 (middle temporal gyrus) |
| Motor             | 1024, 2024 (left and right gyrus precentralis); 1022, 2022 (left and right gyrus postcentralis)                                                                                                                                                                                                                                                  |

**Table 1:** Labels used to index brain regions to create participant-specific anatomical masks of selected ROIs based on Freesurfer’s `recon-all` labels (Dale et al., 1999)



## 1017 Statistical analyses

1018 All statistical analyses were run inside a Docker software container or, if analyses were executed on  
1019 a high performance computing (HPC), a Singularity version of the same container (Kurtzer et al.,  
1020 2017; Sochat et al., 2017). All main statistical analyses were conducted using LME models employing  
1021 the `lmer` function of the `lme4` package (version 1.1.27.1, Bates et al., 2015) in R (version 4.1.2, R  
1022 Core Team, 2019). If not stated otherwise, all models were fit with participants considered as a  
1023 random effect on both the intercept and slopes of the fixed effects, in accordance with results from  
1024 Barr et al. (2013) who recommend to fit the most complex model consistent with the experimental  
1025 design. If applicable, explanatory variables were standardized to a mean of zero and a standard  
1026 deviation of one before they entered the models. If necessary, we removed by-participant slopes  
1027 from the random effects structure to achieve a non-singular fit of the model (Barr et al., 2013).  
1028 Models were fitted using the Bound Optimization BY Quadratic Approximation (BOBYQA) optimizer  
1029 (Powell, 2007, 2009) with a maximum of 500,000 function evaluations and no calculation of gradient  
1030 and Hessian of nonlinear optimization solution. The likelihoods of the fitted models were assessed  
1031 using Type III analysis of variance (ANOVA) with Satterthwaite's method. A single-step multiple  
1032 comparison procedure between the means of the relevant factor levels was conducted using Tukey's  
1033 honest significant difference (HSD) test (Tukey, 1949), as implemented in the `emmeans` package in R  
1034 (version 1.7.0, Lenth, 2019; R Core Team, 2019). In all other analyses, we used one-sample *t*-tests  
1035 if group data was compared to a baseline or paired *t*-tests if two samples from the same population  
1036 were compared. If applicable, correction for multiple hypothesis testing was performed using the false  
1037 discovery rate (FDR) (Benjamini and Hochberg, 1995) or Bonferroni (Bonferroni, 1936) correction  
1038 method. If not stated otherwise, the  $\alpha$ -level was set to  $\alpha = 0.05$ , and analyses of response times  
1039 included data from correct trials only. When effects of stimulus transitions were analyzed, data from  
1040 the first trial of each run and the first trial after the change in transition structure were removed.

1041 **Statistical analyses of behavioral data** In order to test the a-priori hypothesis that behavioral  
1042 accuracy in each of the nine runs of the recall trials and five runs of the graph trials would be higher  
1043 than the chance-level, we performed a series of one-sided one-sample *t*-tests that compared partici-  
1044 pants' mean behavioral accuracy per run against the chance level of  $100\%/6 = 16.67\%$ . Participants'  
1045 behavioral accuracy was calculated as the proportion of correct responses per run (in %). The effect  
1046 sizes (Cohen's *d*) were calculated as the difference between the mean of behavioral accuracy scores  
1047 across participants and the chance baseline (16.67%), divided by the standard deviation of the data  
1048 (Cohen, 1988). The resulting *p*-values were adjusted for multiple comparisons using the Bonferroni  
1049 correction (Bonferroni, 1936).

1050 To examine the effect of task run on behavioral accuracy and response times in recall and graph  
1051 trials, we conducted an LME model that included all nine task runs of the recall trials (or five runs  
1052 of graph trials) as a numeric predictor variable (runs 1 to 9 and 1 to 5, respectively) as the main  
1053 fixed effect of interest as well as random intercepts and slopes for each participant. We also conceived  
1054 separate LME models that did not include data from the first task run of each task condition. These  
1055 models only included eight task runs of the recall trials (or four runs of the graph trials) as a numeric  
1056 predictor variable (runs 2 to 9 and 2 to 5, respectively) as the main fixed effect of interest as well as  
1057 by-participant random intercepts and slopes.

1058 Analyzing the effect of one-step transition probabilities on behavioral accuracy and response times,  
1059 we conducted two-sided paired *t*-tests comparing the effect of high vs. low transition probability

1060 separately for both unidirectional ( $p_{ij} = 0.7$  vs.  $p_{ij} = 0.1$ ) and bidirectional ( $p_{ij} = 0.35$  vs.  $p_{ij} = 0.1$ )  
1061 data. Effect sizes (Cohen’s  $d$ ) were calculated by dividing the mean difference of the paired samples  
1062 by the standard deviation of the difference (Cohen, 1988) and  $p$ -values were adjusted for multiple  
1063 comparisons across both graph conditions and response variables using the Bonferroni correction  
1064 (Bonferroni, 1936).

1065 In order to examine the effect of node distance on response times in graph trials, we conducted  
1066 separate LME models for data from the unidirectional and bidirectional graph structures. For LME  
1067 models of response time in unidirectional data, we included a linear predictor variable of node distance  
1068 (assuming a linear increase of response time with node distance; see Fig. 2d top right) as well as random  
1069 intercepts and slopes for each participant. The linear predictor variable was coded such that the node  
1070 distance linearly increased from  $-2$  to  $+2$  in steps of 1, modeling the hypothesized increase of response  
1071 time with node distance from 1 to 5 (centered on the node distance of 3). For LME models of response  
1072 time in bidirectional data, we included a quadratic predictor variable of node distance (assuming an  
1073 inverted U-shaped relationship between node distance and response time; see Fig. 2d bottom right) as  
1074 well as by-participant random intercepts and slopes. The quadratic predictor variable of node distance  
1075 was obtained by squaring the linear predictor variable. We also conducted separate LME models, that  
1076 did not include data of the most frequent transitions in both the uni- and bi-directional data, but  
1077 were otherwise specified in the same fashion.

1078 **Behavioral modeling based on the successor representation** We modeled successor represen-  
1079 tations (SRs) for each participant depending on the transitions they experienced in the task, including  
1080 training and recall trials. Specifically, each of the six stimuli was associated with a vector that reflected  
1081 a *running* estimate of the long-term visitation probability of all six stimuli, starting from the present  
1082 node. The successor matrix  $\mathbf{M}^t$  was therefore a 6-by-6 matrix that contained six predictive vectors,  
1083 one for each stimulus, and changed over time (hence the index  $t$ ). The SR matrix on the first trial was  
1084 initialized with a baseline expectation of  $\frac{1}{36}$  for each node. After a transition between stimuli  $s_t$  and  
1085  $s_{t+1}$ , the matrix row corresponding to  $s_t$  was updated following a temporal difference (TD) learning  
1086 rule (Dayan, 1993; Russek et al., 2017) as follows:

$$\mathbf{M}_{s_t,*}^t = \mathbf{M}_{s_t,*}^t + \alpha \left[ \mathbf{1}_{s_{t+1}} + \gamma \mathbf{M}_{s_{t+1},*}^t - \mathbf{M}_{s_t,*}^t \right] \quad (2)$$

1087 whereby  $\mathbf{1}_{s_{t+1}}$  is a zero vector with a 1 in the  $s_{t+1}$ <sup>th</sup> position,  $\mathbf{M}_{s_t,*}^t$  is the row corresponding to  
1088 stimulus  $s_t$  of matrix  $\mathbf{M}$ . The learning rate  $\alpha$  was arbitrarily set to a fixed value of 0.1, and the  
1089 discount parameter  $\gamma$  was varied in increments of 0.05 from 0 to 0.95, as described in the main text.  
1090 This meant that the SR matrix would change throughout the task to reflect the experienced transitions  
1091 of each participant, first reflecting the random transitions experienced during the training and recall  
1092 trials, then adapting to the first experienced graph structure and later to the second graph structure.  
1093 In order to relate the SR models to participants’ response times, we calculated how surprising each  
1094 transition in the graph learning task was – assuming participants’ expectations were based on the  
1095 current SR on the given trial,  $\mathbf{M}^t$ . To this end, we normalized  $\mathbf{M}^t$  to sum to 1, and then calculated  
1096 the Shannon information (Shannon, 1948) for each trial, reflecting how surprising the just observed  
1097 transition from stimulus  $i$  to  $j$  was given the history of previous transitions up to time point  $t$ :

$$I(j) = -\log_2(\tilde{m}_{i,j}^t) \quad (3)$$

1098 where  $\tilde{m}_{i,j}^t$  is the normalized  $(i,j)^{\text{th}}$  entry of SR matrix  $\mathbf{M}^t$ . Using the base-2 logarithm allowed  
1099 to express the units of information in bits (binary digits) and the negative sign ensured that the  
1100 information measure was always positive or zero.

1101 The final step in our analysis was to estimate LME models that tested how strongly this trial-wise  
1102 measure of SR-based surprise was related to participants' response times in the graph learning task,  
1103 for each level of the discount parameter  $\gamma$ . LME models therefore included fixed effects of the SR-  
1104 based Shannon surprise, in addition to factors of task run, graph order (uni – bi vs. bi – uni) and  
1105 graph structure (uni vs. bi) of the current run, as well as by-participant random intercepts and slopes.  
1106 Separate LME models were conducted for each level of  $\gamma$ , and model comparison of the twenty models  
1107 was performed using AIC, as reported in the main text. To independently investigate the effects of  
1108 graph condition (uni vs. bi) and graph order (uni – bi vs. bi – uni), we analyzed separate LME models  
1109 for each combination of the two factors, using only SR-based Shannon surprise as the main fixed effect  
1110 of interest, and including by-participant random intercepts and slopes.

1111 **Statistical analysis of classification accuracy and single-trial decoding time courses** In  
1112 order to assess the classifiers' ability to differentiate between the neural activation patterns of individ-  
1113 ual visual objects and motor responses, we compared the predicted visual object or motor response  
1114 of each example in the test set to the visual object or motor response that actually occurred on the  
1115 corresponding trial. We obtained an average classification accuracy score for each participant by cal-  
1116 culating the mean proportion of correct classifier predictions across all correctly answered recall trials  
1117 in session 1 (Fig. 4a). The mean decoding accuracy scores of all participants were then compared  
1118 to the chance baseline of  $100\%/6 = 16.67\%$  using a one-sided one-sample  $t$ -test, testing the a-priori  
1119 hypothesis that mean classification accuracy would be higher than the chance baseline. The effect  
1120 size (Cohen's  $d$ ) was calculated as the difference between the mean of accuracy scores and the chance  
1121 baseline, divided by the standard deviation of the data (Cohen, 1988). These calculations were per-  
1122 formed separately for each ROI and the resulting  $p$ -values were adjusted for multiple comparisons  
1123 using Bonferroni correction (Bonferroni, 1936).

1124 We also examined the effect of task run on classification accuracy in recall trials. To this end,  
1125 we conducted an LME model including the task run as the main fixed effect of interest as well as  
1126 by-participant random intercepts and slopes (Fig. 4c). We then assessed whether performance was  
1127 above the chance level for all nine task runs and conducted nine separate one-sided one-sample  $t$ -tests  
1128 separately per ROIs, testing the a-priori hypothesis that mean decoding accuracy would be higher  
1129 than the 16.67% chance-level in each task run. All  $p$ -values were adjusted for 18 multiple comparisons  
1130 (across nine runs and two ROIs) using the Bonferroni-correction (Bonferroni, 1936).

1131 Furthermore, we assessed the classifiers' ability to accurately detect the presence of visual objects  
1132 and motor responses on a single trial basis. For this analysis we applied the trained classifiers to fifteen  
1133 volumes from the volume closest to the event onset and examined the time courses of the probabilistic  
1134 classification evidence in response to the event on a single trial basis (Fig. 4b). In order to test if  
1135 the time series of classifier probabilities reflected the expected increase of classifier probability for  
1136 the event occurring on a given trial, we compared the time series of classifier probabilities related to  
1137 the classified class with the mean time courses of all other classes using a two-sided paired  $t$ -test at  
1138 the fourth TR from event onset. Classifier probabilities were normalized by dividing each classifier  
1139 probability by the sum of the classifier probabilities across all fifteen TRs of a given trial. Here,  
1140 we used the Bonferroni-correction method (Bonferroni, 1936) to adjust for multiple comparisons of

1141 two observations. In the main text, we report the results for the peak in classification probability  
1142 of the true class, corresponding to the fourth TR after stimulus onset. The effect size (Cohen’s  $d$ )  
1143 was calculated as the difference between the means of the probabilities of the current versus all other  
1144 stimuli, divided by the standard deviation of the difference (Cohen, 1988).

1145 **Statistical analyses of classifier time courses on graph trials** Classifier probabilities on graph  
1146 trials indicated that the fMRI signal was strongly dominated by the activation of the event on the  
1147 current trial. In order to test this effect, we calculated the mean classifier probabilities for the current  
1148 and all other five events of the current trial across all eight TRs in the ITIs. The mean classifier prob-  
1149 abilities of the current event were then compared to the mean classifier probabilities of all other events  
1150 using two two-sided paired  $t$ -tests, one for each ROI. The Bonferroni-correction method Bonferroni  
1151 (1936) was used to correct the  $p$ -values for two comparisons. The effect size (Cohen’s  $d$ ) was calculated  
1152 as the difference between the means of the probabilities of the current versus all other events, divided  
1153 by the standard deviation of the difference Cohen (1988).

1154 After excluding data from the event of the current trial, we analyzed the effect of node distance on  
1155 classifier probabilities for all non-displayed items using separate LME models for each graph structure,  
1156 similar to the analysis of response times described above. Based on our previous findings indicating  
1157 that the ordering of sequential neural events unfolds in the same order in earlier TRs and in reverse  
1158 order in later TRs (cf. Wittkuhn and Schuck, 2021), we also included a fixed effect of interval phase  
1159 (early TRs 1–4 vs. late TRs 5–8). In addition, each model included a fixed effect of ROI (occipito-  
1160 temporal vs. sensorimotor). As for response times (see above), LME models of classifier probabilities  
1161 in unidirectional or bidirectional data included a linear or quadratic predictor variable of node distance,  
1162 respectively, as well as random intercepts and slopes for each participant. In order to examine the effect  
1163 of a linear predictor in bidirectional data and the effect of the quadratic predictor in unidirectional  
1164 data, predictor variables were switched accordingly, but otherwise the LME were conducted as before.  
1165 Finally, we also directly compared the fits of a linear and quadratic model for each graph condition,  
1166 ROI, and interval phase and quantified the model comparison using AIC.

1167 **Predicting sequence probability during on-task intervals** We computed how likely it was  
1168 to observe each 5-item sequence of stimuli under the assumption that participants were internally  
1169 sampling from an SR model of the unidirectional or bidirectional graph structure. This was done in  
1170 two steps.

1171 First, we computed an ideal SR representation based on the true transition probabilities for each  
1172 graph structure. Specifically, we defined the true transition function  $\mathbf{T}$ , as given by a graph, such that  
1173 each entry  $t_{ij}$  reflected the true probability of transitioning from image  $i$  to  $j$ . Following the main  
1174 ideas of the SR, we then calculated the long-term visitation probabilities as the time-discounted 5-step  
1175 probabilities following the Chapman-Kolmogorov Equation:

$$\hat{\mathbf{M}} = \mathbf{T} + \gamma\mathbf{T}^2 + \gamma^2\mathbf{T}^3 + \gamma^3\mathbf{T}^4 + \gamma^4\mathbf{T}^5 \quad (4)$$

1176 The discount rate  $\gamma$  was set to 0.3. We used five steps since more steps make little practical dif-  
1177 ference given the exponential discounting. The theoretical sequence probabilities for a given sequence  
1178  $\mathbf{s}$  were then computed as the product of probabilities for all pairwise transitions  $(i, j)$  in the sequence,  
1179 according to the approximated and normalized SR matrix:

$$p(\mathbf{s}) = \prod_{i,j \in \mathbf{s}} \tilde{m}_{i,j} \quad (5)$$

1180 Second, we approximated how likely it was to observe a sequence in the fMRI signal, given a  
1181 particular sequence event in the brain. Our previous work has investigated which sequences are  
1182 observed in classifier probabilities for a known true sequence (Wittkuhn and Schuck, 2021), and found  
1183 that random reordering of items (induced by noise) was most prominent for the middle sequence items,  
1184 and less severe for the start and end items. To model this effect, we set up a hidden markov model  
1185 (HMM) in which the emission probabilities for the items that came first or last in a sequence were  
1186 tuned sharply, sampled from a Gaussian distribution with a standard deviation of 0.5. This meant  
1187 that the probability to observe the true item was 79%, and the probabilities to observe other items  
1188 decreased sharply with distance from the true sequence position. The intermediate items had emission  
1189 probabilities sampled from a Gaussian with a larger standard deviation of 2, yielding a much flatter  
1190 distribution (probability to observe the true item at these positions was merely 19.9%). Using the  
1191 HMM framework, we then computed the “forward” probabilities to observe a specific sequence given  
1192 the transitions of a true sequence and the specified emission probabilities.

1193 Finally, we combined the two probabilities that resulted from steps 1 and 2: (1) how likely a given  
1194 sequence was to have resulted from a sample of an SR-based internal model of a graph structure,  
1195 and (2) how likely it was to *observe* a sequence in the fMRI signal, given a specific sequence has  
1196 been reactivated in the brain. To obtain our final estimates, we multiplied these probabilities for  
1197 each sequence. This yielded the total probability to *observe* each sequence, assuming a true sequence  
1198 distribution that results from sampling from the SR model, and a noise model that relates true to  
1199 observed sequences.

1200 To examine the relationship between predicted sequences based on this approach and observed  
1201 sequences in fMRI during on-task intervals, we ordered the classes by their classifier probabilities  
1202 within each TR (removing the class of the stimulus shown on the current trial) to obtain the observed  
1203 frequencies for each of the possible 120 5-item sequences across all TRs of the on-task intervals during  
1204 the graph learning task, separately for each participant, ROI and graph condition. The resulting  
1205 distribution indicated how often classifier probabilities within TRs were ordered according to the 120  
1206 sequential 5-item combinations. This distribution was then averaged across participants for each of the  
1207 120 sequences and correlated with the sequence probability based on the HMM approach described  
1208 above, separately for each ROI and graph condition (using Pearson’s correlation across 120 data  
1209 points).

1210 **Calculating the TR-wise sequentiality metric** To analyze evidence for sequential replay during  
1211 on-task intervals in graph trials, we calculated a sequentiality metric quantified by the slope of a linear  
1212 regression between the classifier probabilities and each of the  $5! = 120$  possible sequential orderings  
1213 of a 5-item sequence in each TR, similar to our previous work (Wittkuhn and Schuck, 2021). We  
1214 next separated the regression slope data based on how likely the permuted sequences were given the  
1215 transition probabilities of the two graph structures in our experiment. To determine the probabilities of  
1216 each possible sequential ordering of the 5-item sequences, we used the HMM approach described above  
1217 to obtain the probability of all the  $5! = 120$  sequences, assuming a particular starting position (i.e.,  
1218 the event on the current trial). Next, we ranked the permuted sequences according to their probability  
1219 given the graph structures which allowed us to separately investigate sequentiality for the most and

1220 the least likely sequences based on the graph structure. We then separated the ranked sequences into  
1221 quintiles, i.e., five groups of ranked sequences from the least likely to the most likely 20%. Finally,  
1222 we averaged the regression slopes separately for both ROIs, the two graph structures and the early  
1223 and late TRs and compared the average slope against zero (the assumption of no sequentiality). The  
1224 mean slope coefficients of all participants were compared to zero using a series of two-sided one-sample  
1225 *t*-test, one for each graph condition, ROI, interval phase and sequence ranking bracket. *p*-values were  
1226 adjusted for multiple comparisons using Bonferroni correction (Bonferroni, 1936). The effect size  
1227 (Cohen's *d*) was calculated as the difference between the mean of slope coefficients and the baseline,  
1228 divided by the standard deviation of the data (Cohen, 1988).

## 1229 Data and code availability statement

1230 Behavioral and MRI data as well as custom code used in this study will be made available upon  
1231 publication in a peer-reviewed journal.

## 1232 Acknowledgments

1233 This work was supported by an Independent Max Planck Research Group grant awarded to N.W.S  
1234 by the Max Planck Society (M.TN.A.BILD0004), and a Starting Grant awarded to N.W.S by the  
1235 European Union (ERC-2019-StG REPLAY-852669). L.W. is a pre-doctoral fellow of the Interna-  
1236 tional Max Planck Research School on Computational Methods in Psychiatry and Ageing Research  
1237 (IMPRS COMP2PSYCH). The participating institutions are the Max Planck Institute for Human De-  
1238 velopment, Berlin, Germany, and University College London, London, UK. For more information, see  
1239 <https://www.mps-ucl-centre.mpg.de/en/comp2psych>. We also thank Leonardo Pettini for help  
1240 with task development, Gregor Caregnato for help with participant recruitment and study coordi-  
1241 nation, Sonali Beckmann, Sam Chien (<https://orcid.org/0000-0003-4306-1308>), Theresa Fox,  
1242 Sam Hall-McMaster (<https://orcid.org/0000-0003-1641-979X>), Nir Moneta (<https://orcid.org/0000-0001-6125-4117>),  
1243 Liliana Polyanska (<https://orcid.org/0000-0002-0842-8787>), Na-  
1244 dine Taube, and Kateryna Yasynska – in alphabetical order of last names – for assistance with MRI  
1245 data acquisition, Anika Löwe (<https://orcid.org/0000-0003-3132-5767>) for help with MRI data  
1246 collection and comments on a previous version of this manuscript, Ondřej Zíka (<https://orcid.org/0000-0003-0483-4443>)  
1247 for help with MRI data collection and statistical analyses, Michael Krause  
1248 for help with high performance computing (HPC), all members of the Max Planck Research Group  
1249 NeuroCode for helpful discussions about the contents of this manuscript, and all participants for their  
1250 participation.

## 1251 Author Contributions

1252 The following list of author contributions is based on the CRediT taxonomy (Brand et al., 2015). For  
1253 details on each type of author contribution, please see Brand et al. (2015).

1254 Conceptualization: L.W., N.W.S.; Methodology: L.W., L.M.K., N.W.S.; Software: L.W., L.M.K.,  
1255 N.W.S.; Validation: L.W.; Formal analysis: L.W., N.W.S.; Investigation: L.W., L.M.K.; Resources:  
1256 L.W., N.W.S.; Data curation: L.W., L.M.K.; Writing - original draft: L.W.; Writing - review &  
1257 editing: L.W., L.M.K., N.W.S.; Visualization: L.W.; Supervision: N.W.S.; Project administration:  
1258 L.W., N.W.S.; Funding acquisition: N.W.S.

1259 **Competing Interests**

1260 The authors declare no competing interests.

## 1261 References

- 1262 Alexandre Abraham, Fabian Pedregosa, Michael Eickenberg, Philippe Gervais, Andreas Mueller,  
1263 Jean Kossaifi, Alexandre Gramfort, Bertrand Thirion, and Gaël Varoquaux. Machine learning  
1264 for neuroimaging with scikit-learn. *Frontiers in Neuroinformatics*, 8, Feb 2014. ISSN 1662-5196.  
1265 doi:[10.3389/fninf.2014.00014](https://doi.org/10.3389/fninf.2014.00014). URL <http://dx.doi.org/10.3389/fninf.2014.00014>.
- 1266 B. Avants, C Epstein, M. Grossman, and J. Gee. Symmetric diffeomorphic image registration with  
1267 cross-correlation: Evaluating automated labeling of elderly and neurodegenerative brain. *Medical*  
1268 *Image Analysis*, 12(1):26–41, Feb 2008. ISSN 1361-8415. doi:[10.1016/j.media.2007.06.004](https://doi.org/10.1016/j.media.2007.06.004). URL  
1269 <http://dx.doi.org/10.1016/j.media.2007.06.004>.
- 1270 David Badre and Derek Evan Nee. Frontal cortex and the hierarchical control of  
1271 behavior. *Trends in Cognitive Sciences*, 22(2):170–188, 2018. ISSN 1364-6613.  
1272 doi:<https://doi.org/10.1016/j.tics.2017.11.005>. URL [https://www.sciencedirect.com/science/](https://www.sciencedirect.com/science/article/pii/S1364661317302450)  
1273 [article/pii/S1364661317302450](https://www.sciencedirect.com/science/article/pii/S1364661317302450).
- 1274 Jan Balaguer, Hugo Spiers, Demis Hassabis, and Christopher Summerfield. Neural mechanisms of  
1275 hierarchical planning in a virtual subway network. *Neuron*, 90(4):893 – 903, 2016. ISSN 0896-  
1276 6273. doi:<https://doi.org/10.1016/j.neuron.2016.03.037>. URL [http://www.sciencedirect.com/](http://www.sciencedirect.com/science/article/pii/S0896627316300575)  
1277 [science/article/pii/S0896627316300575](http://www.sciencedirect.com/science/article/pii/S0896627316300575).
- 1278 Dale J. Barr, Roger Levy, Christoph Scheepers, and Harry J. Tily. Random effects structure for  
1279 confirmatory hypothesis testing: Keep it maximal. *Journal of Memory and Language*, 68(3):255–  
1280 278, 2013. ISSN 0749596X. doi:[10.1016/j.jml.2012.11.001](https://doi.org/10.1016/j.jml.2012.11.001). URL [http://dx.doi.org/10.1016/j.](http://dx.doi.org/10.1016/j.jml.2012.11.001)  
1281 [jml.2012.11.001](http://dx.doi.org/10.1016/j.jml.2012.11.001).
- 1282 Helen C. Barron, Mona M. Garvert, and Timothy E. J. Behrens. Repetition suppression: a means  
1283 to index neural representations using bold? *Philosophical Transactions of the Royal Society B:*  
1284 *Biological Sciences*, 371(1705):20150355, Oct 2016. ISSN 1471-2970. doi:[10.1098/rstb.2015.0355](https://doi.org/10.1098/rstb.2015.0355).  
1285 URL <http://dx.doi.org/10.1098/rstb.2015.0355>.
- 1286 Douglas Bates, Martin Mächler, Ben Bolker, and Steve Walker. Fitting linear mixed-effects  
1287 models using lme4. *Journal of Statistical Software*, 67(1):1–48, 2015. ISSN 1548-7660.  
1288 doi:[10.18637/jss.v067.i01](https://doi.org/10.18637/jss.v067.i01). URL <https://www.jstatsoft.org/v067/i01>.
- 1289 Timothy E.J. Behrens, Timothy H. Muller, James C.R. Whittington, Shirley Mark, Alon B.  
1290 Baram, Kimberly L. Stachenfeld, and Zeb Kurth-Nelson. What is a cognitive map? orga-  
1291 nizing knowledge for flexible behavior. *Neuron*, 100(2):490–509, Oct 2018. ISSN 0896-6273.  
1292 doi:[10.1016/j.neuron.2018.10.002](https://doi.org/10.1016/j.neuron.2018.10.002). URL <http://dx.doi.org/10.1016/j.neuron.2018.10.002>.
- 1293 Yashar Behzadi, Khaled Restom, Joy Liau, and Thomas T. Liu. A component based noise correc-  
1294 tion method (CompCor) for BOLD and perfusion based fMRI. *NeuroImage*, 37(1):90–101, Aug  
1295 2007. ISSN 1053-8119. doi:[10.1016/j.neuroimage.2007.04.042](https://doi.org/10.1016/j.neuroimage.2007.04.042). URL [http://dx.doi.org/10.1016/](http://dx.doi.org/10.1016/j.neuroimage.2007.04.042)  
1296 [j.neuroimage.2007.04.042](http://dx.doi.org/10.1016/j.neuroimage.2007.04.042).
- 1297 Jacob L. S. Bellmund, William de Cothi, Tom A. Ruiter, Matthias Nau, Caswell Barry, and Chris-  
1298 tian F. Doeller. Deforming the metric of cognitive maps distorts memory. *Nature Human Behaviour*,  
1299 4(2):177–188, 2020. doi:[10.1038/s41562-019-0767-3](https://doi.org/10.1038/s41562-019-0767-3). URL [https://doi.org/10.1038/s41562-](https://doi.org/10.1038/s41562-019-0767-3)  
1300 [019-0767-3](https://doi.org/10.1038/s41562-019-0767-3).



- 1301 Yoav Benjamini and Yosef Hochberg. Controlling the false discovery rate: A practical and powerful  
1302 approach to multiple testing. *Journal of the Royal Statistical Society*, 57(1):289–300, 1995. ISSN  
1303 00359246. URL <http://www.jstor.org/stable/2346101>.
- 1304 Carlo Emilio Bonferroni. Teoria statistica delle classi e calcolo delle probabilità. *Pubblicazioni del R*  
1305 *Istituto Superiore di Scienze Economiche e Commerciali di Firenze*, 8:3–62, 1936.
- 1306 Aaron M. Bornstein and Nathaniel D. Daw. Dissociating hippocampal and striatal contributions  
1307 to sequential prediction learning. *European Journal of Neuroscience*, 35(7):1011–1023, 2012.  
1308 doi:<https://doi.org/10.1111/j.1460-9568.2011.07920.x>. URL <https://onlinelibrary.wiley.com/doi/abs/10.1111/j.1460-9568.2011.07920.x>.  
1309
- 1310 Sander E. Bosch, Janneke F. M. Jehee, Guillén Fernández, and Christian F. Doeller. Reinstatement of  
1311 associative memories in early visual cortex is signaled by the hippocampus. *Journal of Neuroscience*,  
1312 34(22):7493–7500, 2014. ISSN 0270-6474. doi:[10.1523/JNEUROSCI.0805-14.2014](https://doi.org/10.1523/JNEUROSCI.0805-14.2014). URL <https://www.jneurosci.org/content/34/22/7493>.  
1313
- 1314 Amy Brand, Liz Allen, Micah Altman, Marjorie Hlava, and Jo Scott. Beyond authorship: at-  
1315 tribution, contribution, collaboration, and credit. *Learned Publishing*, 28(2):151–155, apr 2015.  
1316 doi:[10.1087/20150211](https://doi.org/10.1087/20150211). URL <https://doi.org/10.1087/20150211>.
- 1317 Iva K. Brunec and Ida Momennejad. Predictive representations in hippocampal and prefrontal hier-  
1318 archies. *Journal of Neuroscience*, 2021. ISSN 0270-6474. doi:[10.1523/JNEUROSCI.1327-21.2021](https://doi.org/10.1523/JNEUROSCI.1327-21.2021).  
1319 URL <https://www.jneurosci.org/content/early/2021/11/17/JNEUROSCI.1327-21.2021>.
- 1320 Margaret F Carr, Shantanu P Jadhav, and Loren M Frank. Hippocampal replay in the awake state:  
1321 a potential substrate for memory consolidation and retrieval. *Nature Neuroscience*, 14(2):147–153,  
1322 Jan 2011. ISSN 1546-1726. doi:[10.1038/nn.2732](https://doi.org/10.1038/nn.2732). URL <http://dx.doi.org/10.1038/nn.2732>.
- 1323 Jacob Cohen. Statistical power analysis for the behavioral sciences. *Lawrence Erlbaum Associates*,  
1324 1988.
- 1325 Alexandra O. Constantinescu, Jill X. O'Reilly, and Timothy E. J. Behrens. Organizing conceptual  
1326 knowledge in humans with a gridlike code. *Science*, 352(6292):1464–1468, Jun 2016. ISSN 1095-  
1327 9203. doi:[10.1126/science.aaf0941](https://doi.org/10.1126/science.aaf0941). URL <http://dx.doi.org/10.1126/science.aaf0941>.
- 1328 Robert W. Cox and James S. Hyde. Software tools for analysis and visualization of fmri data.  
1329 *NMR in Biomedicine*, 10(4-5):171–178, Jun 1997. ISSN 1099-1492. doi:[10.1002/\(sici\)1099-1492\(199706/08\)10:4/5<171::aid-nbm453>3.0.co;2-l](https://doi.org/10.1002/(sici)1099-1492(199706/08)10:4/5<171::aid-nbm453>3.0.co;2-l). URL [http://dx.doi.org/10.1002/\(SICI\)1099-1492\(199706/08\)10:4/5<171::AID-NBM453>3.0.CO;2-L](http://dx.doi.org/10.1002/(SICI)1099-1492(199706/08)10:4/5<171::AID-NBM453>3.0.CO;2-L).  
1330  
1331
- 1332 Anders M. Dale. Optimal experimental design for event-related fmri. *Human Brain Mapping*, 8(2-3):  
1333 109–114, 1999. ISSN 1097-0193. doi:[10.1002/\(sici\)1097-0193\(1999\)8:2/3<109::aid-hbm7>3.0.co;2-w](https://doi.org/10.1002/(sici)1097-0193(1999)8:2/3<109::aid-hbm7>3.0.co;2-w). URL [http://dx.doi.org/10.1002/\(SICI\)1097-0193\(1999\)8:2/3<109::AID-HBM7>3.0.CO;2-W](http://dx.doi.org/10.1002/(SICI)1097-0193(1999)8:2/3<109::AID-HBM7>3.0.CO;2-W).  
1334  
1335
- 1336 Anders M. Dale, Bruce Fischl, and Martin I. Sereno. Cortical surface-based analysis. *NeuroImage*, 9  
1337 (2):179–194, Feb 1999. ISSN 1053-8119. doi:[10.1006/nimg.1998.0395](https://doi.org/10.1006/nimg.1998.0395). URL <http://dx.doi.org/10.1006/nimg.1998.0395>.  
1338

- 1339 Peter Dayan. Improving generalization for temporal difference learning: The successor representation.  
1340 *Neural Computation*, 5(4):613–624, Jul 1993. ISSN 1530-888X. doi:[10.1162/neco.1993.5.4.613](https://doi.org/10.1162/neco.1993.5.4.613). URL  
1341 <http://dx.doi.org/10.1162/neco.1993.5.4.613>.
- 1342 Lorena Deuker, J. Olligs, J. Fell, T. A. Kranz, F. Mormann, C. Montag, M. Reuter, C. E. Elger, and  
1343 Nikolai Axmacher. Memory consolidation by replay of stimulus-specific neural activity. *Journal of*  
1344 *Neuroscience*, 33(49):19373–19383, Dec 2013. ISSN 1529-2401. doi:[10.1523/jneurosci.0414-13.2013](https://doi.org/10.1523/jneurosci.0414-13.2013).  
1345 URL <http://dx.doi.org/10.1523/JNEUROSCI.0414-13.2013>.
- 1346 Kamran Diba and György Buzsáki. Forward and reverse hippocampal place-cell sequences during  
1347 ripples. *Nature Neuroscience*, 10(10):1241–1242, Sep 2007. ISSN 1546-1726. doi:[10.1038/nn1961](https://doi.org/10.1038/nn1961).  
1348 URL <http://dx.doi.org/10.1038/nn1961>.
- 1349 Bradley B Doll, Katherine D Duncan, Dylan A Simon, Daphna Shohamy, and Nathaniel D Daw.  
1350 Model-based choices involve prospective neural activity. *Nature Neuroscience*, 18(5):767–772, Mar  
1351 2015. ISSN 1546-1726. doi:[10.1038/nn.3981](https://doi.org/10.1038/nn.3981). URL <http://dx.doi.org/10.1038/nn.3981>.
- 1352 S. L. Eagleman and V. Dragoi. Image sequence reactivation in awake V4 networks. *Proceed-*  
1353 *ings of the National Academy of Sciences*, 109(47):19450–19455, Nov 2012. ISSN 1091-6490.  
1354 doi:[10.1073/pnas.1212059109](https://doi.org/10.1073/pnas.1212059109). URL <http://dx.doi.org/10.1073/pnas.1212059109>.
- 1355 Matthias Ekman, Peter Kok, and Floris P. de Lange. Time-compressed preplay of anticipated events  
1356 in human primary visual cortex. *Nature Communications*, 8(15276):1–9, May 2017. ISSN 2041-1723.  
1357 doi:[10.1038/ncomms15276](https://doi.org/10.1038/ncomms15276).
- 1358 Eran Eldar, Gaëlle Lièvre, Peter Dayan, and Raymond J Dolan. The roles of online and offline  
1359 replay in planning. *eLife*, 9, Jun 2020. ISSN 2050-084X. doi:[10.7554/elife.56911](https://doi.org/10.7554/elife.56911). URL <http://dx.doi.org/10.7554/eLife.56911>.  
1360
- 1361 Oscar Esteban, Daniel Birman, Marie Schaer, Oluwasanmi O. Koyejo, Russell A. Poldrack,  
1362 and Krzysztof J. Gorgolewski. MRIQC: Advancing the automatic prediction of image qual-  
1363 ity in MRI from unseen sites. *PLoS ONE*, 12(9):e0184661, Sep 2017. ISSN 1932-6203.  
1364 doi:[10.1371/journal.pone.0184661](https://doi.org/10.1371/journal.pone.0184661). URL <http://dx.doi.org/10.1371/journal.pone.0184661>.
- 1365 Oscar Esteban, Christopher J. Markiewicz, Ross W. Blair, Craig A. Moodie, A. Ilkay Isik, Asier  
1366 Erramuzpe, James D. Kent, Mathias Goncalves, Elizabeth DuPre, Madeleine Snyder, and et al.  
1367 fMRIPrep: A robust preprocessing pipeline for functional MRI. *Nature Methods*, 16(1):111–116,  
1368 Dec 2018. ISSN 1548-7105. doi:[10.1038/s41592-018-0235-4](https://doi.org/10.1038/s41592-018-0235-4). URL <http://dx.doi.org/10.1038/s41592-018-0235-4>.  
1369
- 1370 Oscar Esteban, Rastko Ciric, Karolina Finc, Ross Blair, Christopher J. Markiewicz, Craig A. Moodie,  
1371 James D. Kent, Mathias Goncalves, Elizabeth DuPre, Daniel E. P. Gomez, Zhifang Ye, Taylor Salo,  
1372 Romain Valabregue, Inge K. Amlien, Franziskus Liem, Nir Jacoby, Hrvoje Stojić, Matthew Cieslak,  
1373 Sebastian Urchs, Yaroslav O. Halchenko, Satrajit S. Ghosh, Alejandro De La Vega, Tal Yarkoni,  
1374 Jessey Wright, William H. Thompson, Russell A. Poldrack, and Krzysztof J. Gorgolewski. Analysis  
1375 of task-based functional MRI data preprocessed with fMRIPrep. *bioRxiv*, 2019a. doi:[10.1101/694364](https://doi.org/10.1101/694364).  
1376 URL <https://www.biorxiv.org/content/early/2019/07/08/694364>.

- 1377 Oscar Esteban, Christopher J. Markiewicz, Ross W. Blair, Craig A. Moodie, A. Ilkay Isik, Asier  
1378 Erramuzpe, James D. Kent, Mathias Goncalves, Elizabeth DuPre, Madeleine Snyder, and et al.  
1379 fMRIPrep 1.2.2., 2019b.
- 1380 Alan C. Evans, Andrew L. Janke, D. Louis Collins, and Sylvain Baillet. Brain  
1381 templates and atlases. *NeuroImage*, 62(2):911–922, 2012. ISSN 1053-8119.  
1382 doi:<https://doi.org/10.1016/j.neuroimage.2012.01.024>. URL <https://www.sciencedirect.com/science/article/pii/S1053811912000419>.
- 1384 Bruce Fischl, André van der Kouwe, Christophe Destrieux, Eric Halgren, Florent Ségonne, David H.  
1385 Salat, Evelina Busa, Larry J. Seidman, Jill Goldstein, David Kennedy, Verne Caviness, Nikos Makris,  
1386 Bruce Rosen, and Anders M. Dale. Automatically parcellating the human cerebral cortex. *Cerebral*  
1387 *Cortex*, 14(1):11–22, Jan 2004. ISSN 1460-2199. doi:[10.1093/cercor/bhg087](https://doi.org/10.1093/cercor/bhg087). URL <http://dx.doi.org/10.1093/cercor/bhg087>.
- 1389 VS Fonov, AC Evans, RC McKinstry, CR Almli, and DL Collins. Unbiased nonlinear average age-  
1390 appropriate brain templates from birth to adulthood. *NeuroImage*, 47:S102, Jul 2009. ISSN 1053-  
1391 8119. doi:[10.1016/s1053-8119\(09\)70884-5](https://doi.org/10.1016/s1053-8119(09)70884-5). URL [http://dx.doi.org/10.1016/S1053-8119\(09\)](http://dx.doi.org/10.1016/S1053-8119(09)70884-5)  
1392 [70884-5](http://dx.doi.org/10.1016/S1053-8119(09)70884-5).
- 1393 David J. Foster. Replay comes of age. *Annual Review of Neuroscience*, 40(1):581–602, 2017.  
1394 doi:[10.1146/annurev-neuro-072116-031538](https://doi.org/10.1146/annurev-neuro-072116-031538). URL [https://doi.org/10.1146/annurev-neuro-](https://doi.org/10.1146/annurev-neuro-072116-031538)  
1395 [072116-031538](https://doi.org/10.1146/annurev-neuro-072116-031538).
- 1396 David J. Foster and Matthew A. Wilson. Reverse replay of behavioural sequences in hippocam-  
1397 pal place cells during the awake state. *Nature*, 440(7084):680–683, Feb 2006. ISSN 1476-4687.  
1398 doi:[10.1038/nature04587](https://doi.org/10.1038/nature04587). URL <http://dx.doi.org/10.1038/nature04587>.
- 1399 David J. Foster and Matthew A. Wilson. Hippocampal theta sequences. *Hippocampus*, 17(11):  
1400 1093–1099, 2007. doi:[10.1002/hipo.20345](https://doi.org/10.1002/hipo.20345). URL [https://onlinelibrary.wiley.com/doi/abs/](https://onlinelibrary.wiley.com/doi/abs/10.1002/hipo.20345)  
1401 [10.1002/hipo.20345](https://onlinelibrary.wiley.com/doi/abs/10.1002/hipo.20345).
- 1402 Mona M Garvert, Raymond J Dolan, and Timothy EJ Behrens. A map of abstract relational  
1403 knowledge in the human hippocampal–entorhinal cortex. *eLife*, 6, Apr 2017. ISSN 2050-084X.  
1404 doi:[10.7554/elife.17086](https://doi.org/10.7554/elife.17086). URL <http://dx.doi.org/10.7554/eLife.17086>.
- 1405 Jeffrey P Gavornik and Mark F Bear. Learned spatiotemporal sequence recognition and prediction  
1406 in primary visual cortex. *Nature Neuroscience*, 17(5):732–737, 2014. doi:[10.1038/nn.3683](https://doi.org/10.1038/nn.3683). URL  
1407 <https://doi.org/10.1038/nn.3683>.
- 1408 Samuel J. Gershman, Christopher D. Moore, Michael T. Todd, Kenneth A. Norman, and Per B.  
1409 Sederberg. The successor representation and temporal context. *Neural Computation*, 24(6):1553–  
1410 1568, Jun 2012. ISSN 1530-888X. doi:[10.1162/neco\\_a\\_00282](https://doi.org/10.1162/neco_a_00282). URL [http://dx.doi.org/10.1162/](http://dx.doi.org/10.1162/NECO_a_00282)  
1411 [NECO\\_a\\_00282](http://dx.doi.org/10.1162/NECO_a_00282).
- 1412 Chris Gorgolewski, Nell Hardcastle, Teal Hobson-Lowther, David Nishikawa, Ross Blair, Stefan Ap-  
1413 pelhoff, Suyash, Constellates, Mainak Jas, Chris Holdgraf, Alexander Jones, Rohan Goyal, Robert  
1414 Oostenveld, Chris Markiewicz, Gregory Noack, Matthew Zito, Joke Durnez, Nicolas Traut, Mikael

- 1415 Naveau, Parul Sethi, Yaroslav Halchenko, Taylor Salo, Michael Hanke, Dimitri Papadopoulos Or-  
1416 fanos, Horea Christian, Franklin Feingold, Duncan Macleod, Dewarrn1, Brian Grass, and Adam  
1417 Thomas. bids-standard/bids-validator: 1.4.3, 2020. URL <https://zenodo.org/record/3688707>.
- 1418 Krzysztof J. Gorgolewski, Christopher D. Burns, Cindee Madison, Dav Clark, Yaroslav O. Halchenko,  
1419 Michael L. Waskom, and Satrajit S. Ghosh. Nipype: A flexible, lightweight and extensible neu-  
1420 roimaging data processing framework in Python. *Frontiers in Neuroinformatics*, 5, 2011. ISSN  
1421 1662-5196. doi:[10.3389/fninf.2011.00013](https://doi.org/10.3389/fninf.2011.00013). URL <http://dx.doi.org/10.3389/fninf.2011.00013>.
- 1422 Krzysztof J. Gorgolewski, Tibor Auer, Vince D. Calhoun, R. Cameron Craddock, Samir Das, Eugene P.  
1423 Duff, Guillaume Flandin, Satrajit S. Ghosh, Tristan Glatard, Yaroslav O. Halchenko, and et al.  
1424 The brain imaging data structure, a format for organizing and describing outputs of neuroimaging  
1425 experiments. *Scientific Data*, 3(160044), Jun 2016. ISSN 2052-4463. doi:[10.1038/sdata.2016.44](https://doi.org/10.1038/sdata.2016.44).  
1426 URL <http://dx.doi.org/10.1038/sdata.2016.44>.
- 1427 Krzysztof J. Gorgolewski, Christopher D. Burns, Cindee Madison, Dav Clark, Yaroslav O. Halchenko,  
1428 Michael L. Waskom, and Satrajit S. Ghosh. Nipype, 2019.
- 1429 Douglas N. Greve and Bruce Fischl. Accurate and robust brain image alignment us-  
1430 ing boundary-based registration. *NeuroImage*, 48(1):63–72, Oct 2009. ISSN 1053-8119.  
1431 doi:[10.1016/j.neuroimage.2009.06.060](https://doi.org/10.1016/j.neuroimage.2009.06.060). URL <http://dx.doi.org/10.1016/j.neuroimage.2009.06.060>.  
1432 [06.060](http://dx.doi.org/10.1016/j.neuroimage.2009.06.060).
- 1433 Omer Faruk Gulban, Dylan Nielson, Russ Poldrack, John Lee, Chris Gorgolewski, Vanessasaurus, and  
1434 Satrajit Ghosh. poldracklab/pydeface: v2.0.0, 2019. URL <https://zenodo.org/record/3524400>.
- 1435 Anoopum S. Gupta, Matthijs A.A. van der Meer, David S. Touretzky, and Aaron David Redish. Hip-  
1436 pocampal replay is not a simple function of experience. *Neuron*, 65(5):695 – 705, 2010. ISSN  
1437 0896-6273. doi:[10.1016/j.neuron.2010.01.034](https://doi.org/10.1016/j.neuron.2010.01.034). URL <http://www.sciencedirect.com/science/article/pii/S0896627310000607>.  
1438 [0607](http://www.sciencedirect.com/science/article/pii/S0896627310000607).
- 1439 Yaroslav O. Halchenko, Michael Hanke, Benjamin Poldrack, Kyle Meyer, Debanjum Singh Solanky,  
1440 Gergana Alteva, Jason Gors, Dave MacFarlane, Christian Olaf Häusler, Taylor Olson, Alex Waite,  
1441 Alejandro De La Vega, Vanessa Sochat, Anisha Keshavan, Feilong Ma, Horea Christian, Jorrit  
1442 Poelen, Kusti Skytén, Matteo Visconti di Oleggio Castello, Nell Hardcastle, Torsten Stoeter, Vicky  
1443 C Lau, and Christopher J. Markiewicz. datalad/datalad 0.11.5, 2019. URL [https://zenodo.org/  
1444 record/3233911](https://zenodo.org/record/3233911).
- 1445 Yaroslav O. Halchenko, Kyle Meyer, Benjamin Poldrack, Debanjum Singh Solanky, Adina S. Wag-  
1446 ner, Jason Gors, Dave MacFarlane, Dorian Pustina, Vanessa Sochat, Satrajit S. Ghosh, Christian  
1447 Mönch, Christopher J. Markiewicz, Laura Waite, Ilya Shlyakhter, Alejandro de la Vega, Soichi  
1448 Hayashi, Christian Olaf Häusler, Jean-Baptiste Poline, Tobias Kadelka, Kusti Skytén, Dorota  
1449 Jarecka, David Kennedy, Ted Strauss, Matt Cieslak, Peter Vavra, Horea-Ioan Ioanas, Robin Schnei-  
1450 der, Mika Pflüger, James V. Haxby, Simon B. Eickhoff, and Michael Hanke. DataLad: distributed  
1451 system for joint management of code, data, and their relationship. *Journal of Open Source Software*,  
1452 6(63):3262, 2021. doi:[10.21105/joss.03262](https://doi.org/10.21105/joss.03262). URL <https://doi.org/10.21105/joss.03262>.

- 1453 L.M. Harrison, A. Duggins, and K.J. Friston. Encoding uncertainty in the hippocampus. *Neural*  
1454 *Networks*, 19(5):535–546, 2006. ISSN 0893-6080. doi:<https://doi.org/10.1016/j.neunet.2005.11.002>.  
1455 URL <https://www.sciencedirect.com/science/article/pii/S0893608006000025>.
- 1456 James V. Haxby, M. Ida Gobbini, Maura L. Furey, Alumit Ishai, Jennifer L. Schouten, and Pietro  
1457 Pietrini. Distributed and overlapping representations of faces and objects in ventral temporal cortex.  
1458 *Science*, 293(5539):2425–2430, Sep 2001. ISSN 1095-9203. doi:[10.1126/science.1063736](https://doi.org/10.1126/science.1063736). URL <http://dx.doi.org/10.1126/science.1063736>.  
1459
- 1460 Nicholas C Hindy, Felicia Y Ng, and Nicholas B Turk-Browne. Linking pattern completion in the  
1461 hippocampus to predictive coding in visual cortex. *Nature Neuroscience*, 19(5):665–667, Apr 2016.  
1462 ISSN 1546-1726. doi:[10.1038/nn.4284](https://doi.org/10.1038/nn.4284). URL <http://dx.doi.org/10.1038/nn.4284>.
- 1463 L. T. Hunt, N. D. Daw, P. Kaanders, M. A. MacIver, U. Mugan, E. Procyk, A. D. Redish, E. Russo,  
1464 J. Scholl, K. Stachenfeld, C. R. E. Wilson, and N. Kolling. Formalizing planning and information  
1465 search in naturalistic decision-making. *Nature Neuroscience*, 2021. doi:[10.1038/s41593-021-00866-w](https://doi.org/10.1038/s41593-021-00866-w).  
1466 URL <https://doi.org/10.1038/s41593-021-00866-w>.
- 1467 Mark Jenkinson, Peter Bannister, Michael Brady, and Stephen Smith. Improved optimization for the  
1468 robust and accurate linear registration and motion correction of brain images. *NeuroImage*, 17(2):  
1469 825–841, Oct 2002. ISSN 1053-8119. doi:[10.1006/nimg.2002.1132](https://doi.org/10.1006/nimg.2002.1132). URL <http://dx.doi.org/10.1006/nimg.2002.1132>.  
1470
- 1471 Daoyun Ji and Matthew A Wilson. Coordinated memory replay in the visual cortex and hippocampus  
1472 during sleep. *Nature Neuroscience*, 10(1):100–107, Dec 2006. ISSN 1546-1726. doi:[10.1038/nm1825](https://doi.org/10.1038/nm1825).  
1473 URL <http://dx.doi.org/10.1038/nm1825>.
- 1474 Adam Johnson and Aaron David Redish. Neural ensembles in CA3 transiently encode paths forward of  
1475 the animal at a decision point. *Journal of Neuroscience*, 27(45):12176–12189, Nov 2007. ISSN 1529-  
1476 2401. doi:[10.1523/jneurosci.3761-07.2007](https://doi.org/10.1523/jneurosci.3761-07.2007). URL <http://dx.doi.org/10.1523/JNEUROSCI.3761-07.2007>.  
1477
- 1478 Ari E. Kahn, Elisabeth A. Karuza, Jean M. Vettel, and Danielle S. Bassett. Network constraints on  
1479 learnability of probabilistic motor sequences. *Nature Human Behaviour*, 2(12):936–947, Nov 2018.  
1480 ISSN 2397-3374. doi:[10.1038/s41562-018-0463-8](https://doi.org/10.1038/s41562-018-0463-8). URL <http://dx.doi.org/10.1038/s41562-018-0463-8>.  
1481
- 1482 Raphael Kaplan, Adrià Tauste Campo, Daniel Bush, John King, Alessandro Principe, Raphael Koster,  
1483 Miguel Ley Nacher, Rodrigo Rocamora, and Karl J. Friston. Human hippocampal theta oscillations  
1484 reflect sequential dependencies during spatial planning. *Cognitive Neuroscience*, 11(3):122–  
1485 131, 2020. doi:[10.1080/17588928.2019.1676711](https://doi.org/10.1080/17588928.2019.1676711). URL <https://doi.org/10.1080/17588928.2019.1676711>. PMID: 31617790.  
1486
- 1487 Elisabeth A. Karuza, Sharon L. Thompson-Schill, and Danielle S. Bassett. Local patterns to  
1488 global architectures: Influences of network topology on human learning. *Trends in Cognitive*  
1489 *Sciences*, 20(8):629–640, 2016. ISSN 1364-6613. doi:[10.1016/j.tics.2016.06.003](https://doi.org/10.1016/j.tics.2016.06.003). URL <https://www.sciencedirect.com/science/article/pii/S1364661316300717>.  
1490

- 1491 Elisabeth A. Karuza, Ari E. Kahn, Sharon L. Thompson-Schill, and Danielle S. Bassett. Process  
1492 reveals structure: How a network is traversed mediates expectations about its architecture. *Scien-*  
1493 *tific Reports*, 7(1):12733, 2017. doi:[10.1038/s41598-017-12876-5](https://doi.org/10.1038/s41598-017-12876-5). URL <https://doi.org/10.1038/s41598-017-12876-5>.
- 1495 Elisabeth A. Karuza, Ari E. Kahn, and Danielle S. Bassett. Human sensitivity to community  
1496 structure is robust to topological variation. *Complexity*, 2019:1–8, Feb 2019. ISSN 1099-0526.  
1497 doi:[10.1155/2019/8379321](https://doi.org/10.1155/2019/8379321). URL <http://dx.doi.org/10.1155/2019/8379321>.
- 1498 Kenneth Kay, Jason E. Chung, Marielena Sosa, Jonathan S. Schor, Mattias P. Karlsson, Margaret C.  
1499 Larkin, Daniel F. Liu, and Loren M. Frank. Constant sub-second cycling between representations  
1500 of possible futures in the hippocampus. *Cell*, 180(3):552–567.e25, Jan 2020. ISSN 0092-8674.  
1501 doi:[10.1016/j.cell.2020.01.014](https://doi.org/10.1016/j.cell.2020.01.014). URL <http://dx.doi.org/10.1016/j.cell.2020.01.014>.
- 1502 Arno Klein, Satrajit S. Ghosh, Forrest S. Bao, Joachim Giard, Yrjö Häme, Eliezer Stavsky, Noah  
1503 Lee, Brian Rossa, Martin Reuter, Elias Chaibub Neto, and et al. Mindboggling morphometry  
1504 of human brains. *PLOS Computational Biology*, 13(2):e1005350, Feb 2017. ISSN 1553-7358.  
1505 doi:[10.1371/journal.pcbi.1005350](https://doi.org/10.1371/journal.pcbi.1005350). URL <http://dx.doi.org/10.1371/journal.pcbi.1005350>.
- 1506 Peter Kok and Nicholas B. Turk-Browne. Associative prediction of visual shape in the hip-  
1507 pocampus. *The Journal of Neuroscience*, 38(31):6888–6899, Jul 2018. ISSN 1529-2401.  
1508 doi:[10.1523/JNEUROSCI.0163-18.2018](https://doi.org/10.1523/JNEUROSCI.0163-18.2018). URL <http://dx.doi.org/10.1523/JNEUROSCI.0163-18.2018>.
- 1510 Peter Kok, Janneke F.M. Jehee, and Floris P. de Lange. Less is more: Expectation sharp-  
1511 ens representations in the primary visual cortex. *Neuron*, 75(2):265–270, 2012. ISSN 0896-  
1512 6273. doi:<https://doi.org/10.1016/j.neuron.2012.04.034>. URL <https://www.sciencedirect.com/science/article/pii/S0896627312004382>.
- 1514 Peter Kok, Michel F. Failing, and Floris P. de Lange. Prior expectations evoke stimulus templates  
1515 in the primary visual cortex. *Journal of Cognitive Neuroscience*, 26(7):1546–1554, 07 2014. ISSN  
1516 0898-929X. doi:[10.1162/jocn\\_a.00562](https://doi.org/10.1162/jocn_a.00562). URL [https://doi.org/10.1162/jocn\\_a.00562](https://doi.org/10.1162/jocn_a.00562).
- 1517 James Kolasinski, Tamar R. Makin, Saad Jbabdi, Stuart Clare, Charlotte J. Stagg, and  
1518 Heidi Johansen-Berg. Investigating the stability of fine-grain digit somatotopy in individ-  
1519 ual human participants. *Journal of Neuroscience*, 36(4):1113–1127, 2016. ISSN 0270-6474.  
1520 doi:[10.1523/JNEUROSCI.1742-15.2016](https://doi.org/10.1523/JNEUROSCI.1742-15.2016). URL <https://www.jneurosci.org/content/36/4/1113>.
- 1521 Lukas Kunz, Lorena Deuker, Hui Zhang, and Nikolai Axmacher. Chapter 26 - tracking human engrams  
1522 using multivariate analysis techniques. In Denise Manahan-Vaughan, editor, *Handbook of in Vivo*  
1523 *Neural Plasticity Techniques*, volume 28 of *Handbook of Behavioral Neuroscience*, chapter 26, pages  
1524 481–508. Elsevier, 2018. doi:<https://doi.org/10.1016/B978-0-12-812028-6.00026-4>. URL <https://www.sciencedirect.com/science/article/pii/B9780128120286000264>.
- 1526 Zeb Kurth-Nelson, Marcos Economides, Raymond J. Dolan, and Peter Dayan. Fast sequences  
1527 of non-spatial state representations in humans. *Neuron*, 91(1):194–204, 2016. ISSN 10974199.  
1528 doi:[10.1016/j.neuron.2016.05.028](https://doi.org/10.1016/j.neuron.2016.05.028). URL <http://dx.doi.org/10.1016/j.neuron.2016.05.028>.

- 1529 Gregory M. Kurtzer, Vanessa Sochat, and Michael W. Bauer. Singularity: Scientific containers for  
1530 mobility of compute. *PLoS ONE*, 12(5):e0177459, May 2017. doi:[10.1371/journal.pone.0177459](https://doi.org/10.1371/journal.pone.0177459).  
1531 URL <http://dx.doi.org/10.1371/journal.pone.0177459>.
- 1532 C. Lanczos. Evaluation of noisy data. *Journal of the Society for Industrial and Applied Mathematics*  
1533 *Series B Numerical Analysis*, 1(1):76–85, Jan 1964. ISSN 0887-459X. doi:[10.1137/0701007](https://doi.org/10.1137/0701007). URL  
1534 <http://dx.doi.org/10.1137/0701007>.
- 1535 Steven M. LaValle. *Planning Algorithms*. Cambridge University Press, Cambridge, 2006. ISBN  
1536 9780521862059. doi:[10.1017/CBO9780511546877](https://doi.org/10.1017/CBO9780511546877). URL [https://www.cambridge.org/core/  
1537 books/planning-algorithms/FC9CC7E67E851E40E3E45D6FE328B768](https://www.cambridge.org/core/books/planning-algorithms/FC9CC7E67E851E40E3E45D6FE328B768).
- 1538 Russell Lenth. emmeans: Estimated marginal means, aka least-squares means. 2019. URL [https:  
1539 //CRAN.R-project.org/package=emmeans](https://CRAN.R-project.org/package=emmeans). R package version 1.3.4.
- 1540 Xiangrui Li, Paul S. Morgan, John Ashburner, Jolinda Smith, and Christopher Rorden. The first step  
1541 for neuroimaging data analysis: Dicom to nifti conversion. *Journal of Neuroscience Methods*, 264:  
1542 47–56, May 2016. ISSN 0165-0270. doi:[10.1016/j.jneumeth.2016.03.001](https://doi.org/10.1016/j.jneumeth.2016.03.001). URL [http://dx.doi.org/  
1543 10.1016/j.jneumeth.2016.03.001](http://dx.doi.org/10.1016/j.jneumeth.2016.03.001).
- 1544 Yunzhe Liu, Raymond J. Dolan, Zeb Kurth-Nelson, and Timothy E.J. Behrens. Human re-  
1545 play spontaneously reorganizes experience. *Cell*, 178(3):640–652, Jul 2019. ISSN 0092-8674.  
1546 doi:[10.1016/j.cell.2019.06.012](https://doi.org/10.1016/j.cell.2019.06.012). URL <http://dx.doi.org/10.1016/j.cell.2019.06.012>.
- 1547 Yunzhe Liu, Marcelo G. Mattar, Timothy E. J. Behrens, Nathaniel D. Daw, and Raymond J. Dolan.  
1548 Experience replay is associated with efficient nonlocal learning. *Science*, 372(6544), 2021. ISSN  
1549 0036-8075. doi:[10.1126/science.abf1357](https://doi.org/10.1126/science.abf1357). URL [https://science.sciencemag.org/content/372/  
1550 6544/eabf1357](https://science.sciencemag.org/content/372/6544/eabf1357).
- 1551 Christopher W. Lynn and Danielle S. Bassett. How humans learn and represent networks. *Pro-  
1552 ceedings of the National Academy of Sciences*, 117(47):29407–29415, 2020. ISSN 0027-8424.  
1553 doi:[10.1073/pnas.1912328117](https://doi.org/10.1073/pnas.1912328117). URL <https://www.pnas.org/content/117/47/29407>.
- 1554 Christopher W. Lynn, Ari E. Kahn, Nathaniel Nyema, and Danielle S. Bassett. Abstract representa-  
1555 tions of events arise from mental errors in learning and memory. *Nature Communications*, 11(1),  
1556 May 2020a. ISSN 2041-1723. doi:[10.1038/s41467-020-15146-7](https://doi.org/10.1038/s41467-020-15146-7). URL [http://dx.doi.org/10.1038/  
1557 s41467-020-15146-7](http://dx.doi.org/10.1038/s41467-020-15146-7).
- 1558 Christopher W. Lynn, Lia Papadopoulos, Ari E. Kahn, and Danielle S. Bassett. Human information  
1559 processing in complex networks. *Nature Physics*, Jun 2020b. ISSN 1745-2481. doi:[10.1038/s41567-  
1560 020-0924-7](https://doi.org/10.1038/s41567-020-0924-7). URL <http://dx.doi.org/10.1038/s41567-020-0924-7>.
- 1561 Kevin J Miller and Sarah Jo C Venditto. Multi-step planning in the brain. *Current Opinion in  
1562 Behavioral Sciences*, 38:29–39, 2021. ISSN 2352-1546. doi:[10.1016/j.cobeha.2020.07.003](https://doi.org/10.1016/j.cobeha.2020.07.003). URL  
1563 <http://www.sciencedirect.com/science/article/pii/S2352154620301054>.
- 1564 Yasushi Miyashita. Neuronal correlate of visual associative long-term memory in the primate temporal  
1565 cortex. *Nature*, 335(6193):817–820, Oct 1988. ISSN 1476-4687. doi:[10.1038/335817a0](https://doi.org/10.1038/335817a0). URL [http:  
1566 //dx.doi.org/10.1038/335817a0](http://dx.doi.org/10.1038/335817a0).

- 1567 Ida Momennejad. Learning structures: Predictive representations, replay, and generaliza-  
1568 tion. *Current Opinion in Behavioral Sciences*, 32:155–166, Apr 2020. ISSN 2352-1546.  
1569 doi:10.1016/j.cobeha.2020.02.017. URL <http://dx.doi.org/10.1016/j.cobeha.2020.02.017>.
- 1570 Ida Momennejad and Marc W. Howard. Predicting the future with multi-scale successor representa-  
1571 tions. *bioRxiv*, 2018. doi:10.1101/449470. URL [https://www.biorxiv.org/content/early/2018/](https://www.biorxiv.org/content/early/2018/10/22/449470)  
1572 [10/22/449470](https://www.biorxiv.org/content/early/2018/10/22/449470).
- 1573 Ida Momennejad, Evan M. Russek, J. H. Cheong, Matthew M. Botvinick, Nathaniel D. Daw, and  
1574 Samuel J. Gershman. The successor representation in human reinforcement learning. *Nature Human*  
1575 *Behaviour*, 1(9):680–692, Aug 2017. ISSN 2397-3374. doi:10.1038/s41562-017-0180-8. URL [http://](http://dx.doi.org/10.1038/s41562-017-0180-8)  
1576 [dx.doi.org/10.1038/s41562-017-0180-8](http://dx.doi.org/10.1038/s41562-017-0180-8).
- 1577 Ida Momennejad, A Ross Otto, Nathaniel D Daw, and Kenneth A Norman. Offline replay supports  
1578 planning in human reinforcement learning. *eLife*, 7:e32548, Dec 2018. doi:10.7554/eLife.32548. URL  
1579 <https://doi.org/10.7554/eLife.32548>.
- 1580 H. Freyja Ólafsdóttir, Daniel Bush, and Caswell Barry. The role of hippocampal replay  
1581 in memory and planning. *Current Biology*, 28(1):R37–R50, Jan 2018. ISSN 0960-9822.  
1582 doi:10.1016/j.cub.2017.10.073. URL <http://dx.doi.org/10.1016/j.cub.2017.10.073>.
- 1583 Fabian Pedregosa, Gael Varoquaux, Alexandre Gramfort, Vincent Michel, Bertrand Thirion, Olivier  
1584 Grisel, Mathieu Blondel, Peter Prettenhofer, Ron Weiss, Vincent Dubourg, Jake Vanderplas,  
1585 Alexandre Passos, David Cournapeau, Matthieu Brucher, Matthieu Perrot, and Edouard Duchesnay.  
1586 Scikit-learn: Machine learning in Python. *Journal of Machine Learning Research*, 12:2825–2830,  
1587 2011.
- 1588 Jonathan Peirce, Jeremy R. Gray, Sol Simpson, Michael MacAskill, Richard Höchenberger, Hiroyuki  
1589 Sogo, Erik Kastman, and Jonas Kristoffer Lindeløv. Psychopy2: Experiments in behavior made  
1590 easy. *Behavior Research Methods*, 51(1):195–203, Feb 2019. ISSN 1554-3528. doi:10.3758/s13428-  
1591 [018-01193-y](http://dx.doi.org/10.3758/s13428-018-01193-y). URL [http://dx.doi.org/10.3758/s13428-](http://dx.doi.org/10.3758/s13428-018-01193-y)
- 1592 Jonathan W. Peirce. PsychoPy—psychophysics software in python. *Journal of Neuroscience Methods*,  
1593 162(1-2):8–13, may 2007. doi:10.1016/j.jneumeth.2006.11.017. URL [https://doi.org/10.1016%](https://doi.org/10.1016%2Fj.jneumeth.2006.11.017)  
1594 [2Fj.jneumeth.2006.11.017](https://doi.org/10.1016%2Fj.jneumeth.2006.11.017).
- 1595 Jonathan W Peirce. Generating stimuli for neuroscience using PsychoPy. *Frontiers in Neuroinformat-*  
1596 *ics*, 2, 2008. doi:10.3389/neuro.11.010.2008. URL [https://doi.org/10.3389%2Fneuro.11.010.](https://doi.org/10.3389%2Fneuro.11.010.2008)  
1597 [2008](https://doi.org/10.3389%2Fneuro.11.010.2008).
- 1598 Brad E. Pfeiffer and David J. Foster. Hippocampal place-cell sequences depict future paths to remem-  
1599 bered goals. *Nature*, 497(7447):74–79, Apr 2013. ISSN 1476-4687. doi:10.1038/nature12112. URL  
1600 <http://dx.doi.org/10.1038/nature12112>.
- 1601 Russell A. Poldrack. Region of interest analysis for fMRI. *Social Cognitive and Affective Neuroscience*,  
1602 2(1):67–70, Mar 2007. ISSN 1749-5024. doi:10.1093/scan/nsm006. URL [http://dx.doi.org/10.](http://dx.doi.org/10.1093/scan/nsm006)  
1603 [1093/scan/nsm006](http://dx.doi.org/10.1093/scan/nsm006).
- 1604 Michael J. D. Powell. Developments of newuoa for unconstrained minimization without derivatives.  
1605 *Department of Applied Mathematics and Theoretical Physics*, 2007.



- 1606 Michael J. D. Powell. The bobyqa algorithm for bound constrained optimization without derivatives.  
1607 *Department of Applied Mathematics and Theoretical Physics*, pages 26–46, 2009.
- 1608 Jonathan D. Power, Anish Mitra, Timothy O. Laumann, Abraham Z. Snyder, Bradley L. Schlaggar,  
1609 and Steven E. Petersen. Methods to detect, characterize, and remove motion artifact in resting state  
1610 fmri. *NeuroImage*, 84:320–341, Jan 2014. ISSN 1053-8119. doi:[10.1016/j.neuroimage.2013.08.048](https://doi.org/10.1016/j.neuroimage.2013.08.048).  
1611 URL <http://dx.doi.org/10.1016/j.neuroimage.2013.08.048>.
- 1612 R Core Team. R: A language and environment for statistical computing, 2019. URL [https://www.R-](https://www.R-project.org/)  
1613 [project.org/](https://www.R-project.org/).
- 1614 Arthur S. Reber. Implicit learning and tacit knowledge. *Journal of Experimental Psychology: General*,  
1615 118(3):219–235, 1989. ISSN 0096-3445. doi:[10.1037/0096-3445.118.3.219](https://doi.org/10.1037/0096-3445.118.3.219). URL [http://dx.doi.](http://dx.doi.org/10.1037/0096-3445.118.3.219)  
1616 [org/10.1037/0096-3445.118.3.219](http://dx.doi.org/10.1037/0096-3445.118.3.219).
- 1617 Martin Reuter, H. Diana Rosas, and Bruce Fischl. Highly accurate inverse consistent reg-  
1618 istration: A robust approach. *NeuroImage*, 53(4):1181–1196, Dec 2010. ISSN 1053-8119.  
1619 doi:[10.1016/j.neuroimage.2010.07.020](https://doi.org/10.1016/j.neuroimage.2010.07.020). URL [http://dx.doi.org/10.1016/j.neuroimage.2010.](http://dx.doi.org/10.1016/j.neuroimage.2010.07.020)  
1620 [07.020](http://dx.doi.org/10.1016/j.neuroimage.2010.07.020).
- 1621 Bruno Rossion and Gilles Pourtois. Revisiting Snodgrass and Vanderwart’s object pictorial set: The  
1622 role of surface detail in basic-level object recognition. *Perception*, 33(2):217–236, Feb 2004. ISSN  
1623 1468-4233. doi:[10.1068/p5117](https://doi.org/10.1068/p5117). URL <http://dx.doi.org/10.1068/p5117>.
- 1624 Evan M. Russek, Ida Momennejad, Matthew M. Botvinick, Samuel J. Gershman, and Nathaniel D.  
1625 Daw. Predictive representations can link model-based reinforcement learning to model-free  
1626 mechanisms. *PLoS Computational Biology*, 13(9):e1005768, Sep 2017. ISSN 1553-7358.  
1627 doi:[10.1371/journal.pcbi.1005768](https://doi.org/10.1371/journal.pcbi.1005768). URL <http://dx.doi.org/10.1371/journal.pcbi.1005768>.
- 1628 Evan M. Russek, Ida Momennejad, Matthew M. Botvinick, Samuel J. Gershman, and Nathaniel D.  
1629 Daw. Neural evidence for the successor representation in choice evaluation. *bioRxiv*, 2021.  
1630 doi:[10.1101/2021.08.29.458114](https://doi.org/10.1101/2021.08.29.458114). URL [https://www.biorxiv.org/content/early/2021/08/31/](https://www.biorxiv.org/content/early/2021/08/31/2021.08.29.458114)  
1631 [2021.08.29.458114](https://www.biorxiv.org/content/early/2021/08/31/2021.08.29.458114).
- 1632 J. R. Saffran, R. N. Aslin, and E. L. Newport. Statistical learning by 8-month-old infants. *Science*,  
1633 274(5294):1926–1928, Dec 1996. ISSN 1095-9203. doi:[10.1126/science.274.5294.1926](https://doi.org/10.1126/science.274.5294.1926). URL [http:](http://dx.doi.org/10.1126/science.274.5294.1926)  
1634 [//dx.doi.org/10.1126/science.274.5294.1926](http://dx.doi.org/10.1126/science.274.5294.1926).
- 1635 Theodore D. Satterthwaite, Mark A. Elliott, Raphael T. Gerraty, Kosha Ruparel, James Loughhead,  
1636 Monica E. Calkins, Simon B. Eickhoff, Hakon Hakonarson, Ruben C. Gur, Raquel E. Gur, and  
1637 Daniel H. Wolf. An improved framework for confound regression and filtering for control of motion  
1638 artifact in the preprocessing of resting-state functional connectivity data. *NeuroImage*, 64:240–  
1639 256, 2013. ISSN 1053-8119. doi:<https://doi.org/10.1016/j.neuroimage.2012.08.052>. URL [https:](https://www.sciencedirect.com/science/article/pii/S1053811912008609)  
1640 [//www.sciencedirect.com/science/article/pii/S1053811912008609](https://www.sciencedirect.com/science/article/pii/S1053811912008609).
- 1641 Anna C. Schapiro and N. Turk-Browne. Statistical learning. In Arthur W. Toga, editor, *Brain*  
1642 *Mapping*, volume 3, pages 501–506. Elsevier, 2015. ISBN 9780123973160. doi:[10.1016/B978-0-12-](https://doi.org/10.1016/B978-0-12-397025-1.00276-1)  
1643 [397025-1.00276-1](https://doi.org/10.1016/B978-0-12-397025-1.00276-1). URL <http://dx.doi.org/10.1016/B978-0-12-397025-1.00276-1>.

- 1644 Anna C. Schapiro, Lauren V. Kustner, and Nicholas B. Turk-Browne. Shaping of object representations  
1645 in the human medial temporal lobe based on temporal regularities. *Current Biology*, 22(17):1622–  
1646 1627, Sep 2012. ISSN 0960-9822. doi:[10.1016/j.cub.2012.06.056](https://doi.org/10.1016/j.cub.2012.06.056). URL <http://dx.doi.org/10.1016/j.cub.2012.06.056>.
- 1648 Anna C Schapiro, Timothy T Rogers, Natalia I Cordova, Nicholas B Turk-Browne, and Matthew M  
1649 Botvinick. Neural representations of events arise from temporal community structure. *Nature*  
1650 *Neuroscience*, 16(4):486–492, Feb 2013. ISSN 1546-1726. doi:[10.1038/nn.3331](https://doi.org/10.1038/nn.3331). URL <http://dx.doi.org/10.1038/nn.3331>.
- 1652 Nicolas W Schuck and Yael Niv. Sequential replay of nonspatial task states in the human hippocampus.  
1653 *Science*, 364(6447):eaaw5181, 2019. doi:[10.1126/science.aaw5181](https://doi.org/10.1126/science.aaw5181).
- 1654 Nicolas W Schuck, Robert Gaschler, and Peter A Frensch. Implicit learning of what comes  
1655 when and where within a sequence: The time-course of acquiring serial position-item and item-  
1656 item associations to represent serial order. *Advances in cognitive psychology*, 8(2):83–97, 2012a.  
1657 doi:[10.2478/v10053-008-0106-0](https://doi.org/10.2478/v10053-008-0106-0). URL <https://pubmed.ncbi.nlm.nih.gov/22679464>.
- 1658 Nicolas W. Schuck, Robert Gaschler, Aysha Keisler, and Peter A. Frensch. Position–item associ-  
1659 ations play a role in the acquisition of order knowledge in an implicit serial reaction time task.  
1660 *Journal of Experimental Psychology: Learning, Memory, and Cognition*, 38(2):440–456, 2012b.  
1661 doi:[10.1037/a0025816](https://doi.org/10.1037/a0025816). URL <https://doi.org/10.1037/a0025816>.
- 1662 Nicolas W. Schuck, Ming Bo Cai, Robert C. Wilson, and Yael Niv. Human orbitofrontal cortex  
1663 represents a cognitive map of state space. *Neuron*, 91(6):1402 – 1412, 2016. ISSN 0896-6273.  
1664 doi:[10.1016/j.neuron.2016.08.019](https://doi.org/10.1016/j.neuron.2016.08.019). URL <http://www.sciencedirect.com/science/article/pii/S0896627316305116>.
- 1666 Carol Augart Seger. Implicit learning. *Psychological Bulletin*, 115(2):163–196, 1994. ISSN 0033-2909.  
1667 doi:[10.1037/0033-2909.115.2.163](https://doi.org/10.1037/0033-2909.115.2.163). URL <http://dx.doi.org/10.1037/0033-2909.115.2.163>.
- 1668 C. E. Shannon. A mathematical theory of communication. *The Bell System Technical Journal*, 27(3):  
1669 379–423, 1948. doi:[10.1002/j.1538-7305.1948.tb01338.x](https://doi.org/10.1002/j.1538-7305.1948.tb01338.x).
- 1670 Brynn E Sherman, Kathryn N Graves, and Nicholas B Turk-Browne. The prevalence and importance  
1671 of statistical learning in human cognition and behavior. *Current Opinion in Behavioral Sciences*,  
1672 32:15–20, Apr 2020. ISSN 2352-1546. doi:[10.1016/j.cobeha.2020.01.015](https://doi.org/10.1016/j.cobeha.2020.01.015). URL <http://dx.doi.org/10.1016/j.cobeha.2020.01.015>.
- 1674 Stephen M. Smith and J. Michael Brady. SUSAN - a new approach to low level image pro-  
1675 cessing. *International Journal of Computer Vision*, 23(1):45–78, May 1997. ISSN 0920-5691.  
1676 doi:[10.1023/a:1007963824710](https://doi.org/10.1023/a:1007963824710). URL <http://dx.doi.org/10.1023/A:1007963824710>.
- 1677 Joan G Snodgrass and Mary Vanderwart. A standardized set of 260 pictures: norms for name  
1678 agreement, image agreement, familiarity, and visual complexity. *Journal of Experimental Psy-*  
1679 *chology: Human learning and memory*, 6(2):174–215, 1980. doi:[10.1037/0278-7393.6.2.174](https://doi.org/10.1037/0278-7393.6.2.174). URL  
1680 <https://doi.org/10.1037/0278-7393.6.2.174>.
- 1681 Vanessa V. Sochat, Cameron J. Prybol, and Gregory M. Kurtzer. Enhancing reproducibility in sci-  
1682 entific computing: Metrics and registry for singularity containers. *PLoS ONE*, 12(11):e0188511,

- 1683 Nov 2017. doi:[10.1371/journal.pone.0188511](https://doi.org/10.1371/journal.pone.0188511). URL [http://dx.doi.org/10.1371/journal.pone.](http://dx.doi.org/10.1371/journal.pone.0188511)  
1684 [0188511](http://dx.doi.org/10.1371/journal.pone.0188511).
- 1685 Alec Solway, Carlos Diuk, Natalia Córdova, Debbie Yee, Andrew G. Barto, Yael Niv, and Matthew M.  
1686 Botvinick. Optimal behavioral hierarchy. *PLoS Computational Biology*, 10(8):1–10, 08 2014.  
1687 doi:[10.1371/journal.pcbi.1003779](https://doi.org/10.1371/journal.pcbi.1003779). URL <https://doi.org/10.1371/journal.pcbi.1003779>.
- 1688 Kimberly L Stachenfeld, Matthew M Botvinick, and Samuel J Gershman. The hippocampus  
1689 as a predictive map. *Nature Neuroscience*, 20(11):1643–1653, Oct 2017. ISSN 1546-1726.  
1690 doi:[10.1038/nn.4650](https://doi.org/10.1038/nn.4650). URL <http://dx.doi.org/10.1038/nn.4650>.
- 1691 Bryan A. Strange, Andrew Duggins, William Penny, Raymond J. Dolan, and Karl J. Friston. Infor-  
1692 mation theory, novelty and hippocampal responses: unpredicted or unpredictable? *Neural Net-*  
1693 *works*, 18(3):225–230, 2005. ISSN 0893-6080. doi:<https://doi.org/10.1016/j.neunet.2004.12.004>.  
1694 URL <https://www.sciencedirect.com/science/article/pii/S0893608005000067>.
- 1695 Richard S. Sutton. Dyna, an integrated architecture for learning, planning, and reacting. *ACM*  
1696 *SIGART Bulletin*, 2(4):160–163, Jul 1991. ISSN 0163-5719. doi:[10.1145/122344.122377](https://doi.org/10.1145/122344.122377). URL  
1697 <http://dx.doi.org/10.1145/122344.122377>.
- 1698 Arielle Tambini and Lila Davachi. Persistence of hippocampal multivoxel patterns into postencoding  
1699 rest is related to memory. *Proceedings of the National Academy of Sciences*, 110(48):19591–19596,  
1700 Nov 2013. ISSN 1091-6490. doi:[10.1073/pnas.1308499110](https://doi.org/10.1073/pnas.1308499110). URL [http://dx.doi.org/10.1073/](http://dx.doi.org/10.1073/pnas.1308499110)  
1701 [pnas.1308499110](http://dx.doi.org/10.1073/pnas.1308499110).
- 1702 Arielle Tambini and Lila Davachi. Awake reactivation of prior experiences consolidates memories  
1703 and biases cognition. *Trends in Cognitive Sciences*, 23(10):876–890, Oct 2019. ISSN 1364-6613.  
1704 doi:[10.1016/j.tics.2019.07.008](https://doi.org/10.1016/j.tics.2019.07.008). URL <http://dx.doi.org/10.1016/j.tics.2019.07.008>.
- 1705 Edward C. Tolman. Cognitive maps in rats and men. *Psychological Review*, 55(4):189–208, 1948.  
1706 ISSN 0033-295X. doi:[10.1037/h0061626](https://doi.org/10.1037/h0061626). URL <http://dx.doi.org/10.1037/h0061626>.
- 1707 John W. Tukey. Comparing individual means in the analysis of variance. *Biometrics*, 5(2):99–114,  
1708 Jun 1949. ISSN 0006-341X. doi:[10.2307/3001913](https://doi.org/10.2307/3001913). URL <http://dx.doi.org/10.2307/3001913>.
- 1709 Nicholas B. Turk-Browne, Justin A. Jungé, and Brian J. Scholl. The automaticity of visual statistical  
1710 learning. *Journal of Experimental Psychology: General*, 134(4):552–564, 2005. ISSN 0096-3445.  
1711 doi:[10.1037/0096-3445.134.4.552](https://doi.org/10.1037/0096-3445.134.4.552). URL <http://dx.doi.org/10.1037/0096-3445.134.4.552>.
- 1712 Nicholas J Tustison, Brian B Avants, Philip A Cook, Yuanjie Zheng, Alexander Egan, Paul A  
1713 Yushkevich, and James C Gee. N4itk: Improved n3 bias correction. *IEEE Transactions on Med-*  
1714 *ical Imaging*, 29(6):1310–1320, Jun 2010. ISSN 1558-254X. doi:[10.1109/tmi.2010.2046908](https://doi.org/10.1109/tmi.2010.2046908). URL  
1715 <http://dx.doi.org/10.1109/TMI.2010.2046908>.
- 1716 Matthijs A A. van der Meer and Aaron David Redish. Covert expectation-of-reward in rat ven-  
1717 tral striatum at decision points. *Frontiers in Integrative Neuroscience*, 3, 2009. ISSN 1662-5145.  
1718 doi:[10.3389/neuro.07.001.2009](https://doi.org/10.3389/neuro.07.001.2009). URL <http://dx.doi.org/10.3389/neuro.07.001.2009>.
- 1719 Guido Van Rossum and Fred L. Drake. *Python 3 Reference Manual*. CreateSpace, Scotts Valley, CA,  
1720 2009. ISBN 1441412697.

- 1721 Pauli Virtanen, Ralf Gommers, Travis E. Oliphant, Matt Haberland, Tyler Reddy, David Cournapeau,  
1722 Evgeni Burovski, Pearu Peterson, Warren Weckesser, and et al. Scipy 1.0: fundamental algorithms  
1723 for scientific computing in python. *Nature Methods*, Feb 2020. ISSN 1548-7105. doi:[10.1038/s41592-  
1724 019-0686-2](https://doi.org/10.1038/s41592-019-0686-2). URL <http://dx.doi.org/10.1038/s41592-019-0686-2>.
- 1725 Matteo Visconti di Oleggio Castello, James E. Dobson, Terry Sackett, Chandana Kodiweera, James V.  
1726 Haxby, Mathias Goncalves, Satrajit Ghosh, and Yaroslav O. Halchenko. Repronim/reproin 0.6.0,  
1727 2020. URL <https://zenodo.org/record/3625000>.
- 1728 Adina S. Wagner, Laura K. Waite, Kyle Meyer, Marisa K. Heckner, Tobias Kadelka, Niels Reuter,  
1729 Alexander Q. Waite, Benjamin Poldrack, Christopher J. Markiewicz, Yaroslav O. Halchenko, Peter  
1730 Vavra, Pattarawat Chormai, Jean-Baptiste Poline, Lya K. Paas, Peer Herholz, Lisa N. Mochalski,  
1731 Nevena Kraljevic, Lisa Wiersch, Alexandre Hutton, Dorian Pustina, Hamzah Hamid Baagil, Tristan  
1732 Glatard, Sarah Oliveira, Giulia Ippoliti, Christian Mönch, Dorien Huijser, and Michael Hanke. *The  
1733 DataLad Handbook*. Zenodo, 2020. doi:[10.5281/ZENODO.3905791](https://doi.org/10.5281/ZENODO.3905791). URL [https://zenodo.org/  
1734 record/3905791](https://zenodo.org/record/3905791).
- 1735 Mengni Wang, David J. Foster, and Brad E. Pfeiffer. Alternating sequences of future and past  
1736 behavior encoded within hippocampal theta oscillations. *Science*, 370(6513):247–250, 2020.  
1737 doi:[10.1126/science.abb4151](https://doi.org/10.1126/science.abb4151). URL <https://science.sciencemag.org/content/370/6513/247>.
- 1738 Nikolaus Weiskopf, Chloe Hutton, Oliver Josephs, and Ralf Deichmann. Optimal EPI parameters for  
1739 reduction of susceptibility-induced BOLD sensitivity losses: A whole-brain analysis at 3 T and 1.5  
1740 T. *NeuroImage*, 33(2):493–504, Nov 2006. ISSN 1053-8119. doi:[10.1016/j.neuroimage.2006.07.029](https://doi.org/10.1016/j.neuroimage.2006.07.029).  
1741 URL <http://dx.doi.org/10.1016/j.neuroimage.2006.07.029>.
- 1742 Andrew M Wikenheiser and Aaron David Redish. Decoding the cognitive map: ensemble hippocampal  
1743 sequences and decision making. *Current Opinion in Neurobiology*, 32:8–15, Jun 2015a. ISSN 0959-  
1744 4388. doi:[10.1016/j.conb.2014.10.002](https://doi.org/10.1016/j.conb.2014.10.002). URL <http://dx.doi.org/10.1016/j.conb.2014.10.002>.
- 1745 Andrew M. Wikenheiser and Aaron David Redish. Hippocampal theta sequences reflect current goals.  
1746 *Nature Neuroscience*, 18(2):289–294, 2015b. doi:[10.1038/nn.3909](https://doi.org/10.1038/nn.3909). URL [https://doi.org/10.  
1747 1038/nn.3909](https://doi.org/10.1038/nn.3909).
- 1748 Robert C. Wilson, Yuji K. Takahashi, Geoffrey Schoenbaum, and Yael Niv. Orbitofrontal  
1749 cortex as a cognitive map of task space. *Neuron*, 81(2):267–279, 2014. ISSN 0896-6273.  
1750 doi:[10.1016/j.neuron.2013.11.005](https://doi.org/10.1016/j.neuron.2013.11.005). URL [http://www.sciencedirect.com/science/article/pii/  
1751 S0896627313010398](http://www.sciencedirect.com/science/article/pii/S0896627313010398).
- 1752 Lennart Wittkuhn and Nicolas W. Schuck. Dynamics of fMRI patterns reflect sub-second activation  
1753 sequences and reveal replay in human visual cortex. *Nature Communications*, 12(1795), 2021.  
1754 doi:[10.1038/s41467-021-21970-2](https://doi.org/10.1038/s41467-021-21970-2). URL <https://doi.org/10.1038/s41467-021-21970-2>.
- 1755 Lennart Wittkuhn, Samson Chien, Sam Hall-McMaster, and Nicolas W. Schuck. Replay in minds  
1756 and machines. *Neuroscience & Biobehavioral Reviews*, 129:367–388, 2021. ISSN 0149-7634.  
1757 doi:[10.1016/j.neubiorev.2021.08.002](https://doi.org/10.1016/j.neubiorev.2021.08.002). URL [https://www.sciencedirect.com/science/article/  
1758 pii/S0149763421003444](https://www.sciencedirect.com/science/article/pii/S0149763421003444).

- 1759 Shengjin Xu, Wanchen Jiang, Mu-ming Poo, and Yang Dan. Activity recall in a visual cortical  
1760 ensemble. *Nature Neuroscience*, 15(3):449–455, Jan 2012. ISSN 1546-1726. doi:[10.1038/nm.3036](https://doi.org/10.1038/nm.3036).  
1761 URL <http://dx.doi.org/10.1038/nm.3036>.
- 1762 Tal Yarkoni, Christopher Markiewicz, Alejandro de la Vega, Krzysztof Gorgolewski, Taylor Salo,  
1763 Yaroslav Halchenko, Quinten McNamara, Krista DeStasio, Jean-Baptiste Poline, Dmitry Petrov,  
1764 Valérie Hayot-Sasson, Dylan Nielson, Johan Carlin, Gregory Kiar, Kirstie Whitaker, Elizabeth  
1765 DuPre, Adina Wagner, Lee Tirrell, Mainak Jas, Michael Hanke, Russell Poldrack, Oscar Esteban,  
1766 Stefan Appelhoff, Chris Holdgraf, Isla Staden, Bertrand Thirion, Dave Kleinschmidt, John Lee,  
1767 Matteo di Castello, Michael Notter, and Ross Blair. PyBIDS: Python tools for BIDS datasets.  
1768 *Journal of Open Source Software*, 4(40):1294, aug 2019a. doi:[10.21105/joss.01294](https://doi.org/10.21105/joss.01294). URL <https://doi.org/10.21105/joss.01294>.  
1769
- 1770 Tal Yarkoni, Christopher J. Markiewicz, Alejandro de la Vega, Krzysztof J. Gorgolewski, Yaroslav O.  
1771 Halchenko, Taylor Salo, Quinten McNamara, Krista DeStasio, Jean-Baptiste Poline, Dmitry Petrov,  
1772 Valérie Hayot-Sasson, Dylan M. Nielson, Johan Carlin, Gregory Kiar, Kirstie Whitaker, Adina  
1773 Wagner, Elizabeth DuPre, Stefan Appelhoff, Alexander Ivanov, Johannes Wennberg, Lee S. Tirrell,  
1774 Oscar Esteban, Mainak Jas, Michael Hanke, Russell Poldrack, Chris Holdgraf, Isla Staden, Ariel  
1775 Rokem, Bertrand Thirion, Chadwick Boulay, Dave F. Kleinschmidt, Erin W Dickie, John A. Lee,  
1776 Matteo Visconti di Oleggio Castello, Michael Philipp Notter, Pauline Roca, and Ross Blair. bids-  
1777 standard/pybids: 0.9.3, 2019b. URL <https://zenodo.org/record/3363985>.
- 1778 Linda Q. Yu, Robert C. Wilson, and Matthew R. Nassar. Adaptive learning is structure  
1779 learning in time. *Neuroscience & Biobehavioral Reviews*, 128:270–281, 2021. ISSN 0149-  
1780 7634. doi:<https://doi.org/10.1016/j.neubiorev.2021.06.024>. URL <https://www.sciencedirect.com/science/article/pii/S0149763421002657>.  
1781
- 1782 Y. Zhang, M. Brady, and S. Smith. Segmentation of brain MR images through a hidden markov  
1783 random field model and the expectation-maximization algorithm. *IEEE Transactions on Medical  
1784 Imaging*, 20(1):45–57, 2001. ISSN 0278-0062. doi:[10.1109/42.906424](https://doi.org/10.1109/42.906424). URL [http://dx.doi.org/  
1785 10.1109/42.906424](http://dx.doi.org/10.1109/42.906424).

## 1786 Glossary

1787 **AC-PC** anterior commissure - posterior commissure.

1788 **AIC** Akaike information criterion.

1789 **ANOVA** analysis of variance.

1790 **ANTs** Advanced Normalization Tools.

1791 **A-P** anterior-to-posterior.

1792 **BIDS** brain imaging data structure.

1793 **BOBYQA** Bound Optimization BY Quadratic Approximation.

1794 **BOLD** blood-oxygen-level dependent.

1795 **CSF** cerebrospinal fluid.

1796 **DGPs** German Psychological Society.

1797 **DICOM** Digital Imaging and Communications in Medicine.

1798 **EPI** echo-planar imaging.

1799 **FA** flip angle.

1800 **FD** framewise displacement.

1801 **FDR** false discovery rate.

1802 **fMRI** functional magnetic resonance imaging.

1803 **FOV** field of view.

1804 **FSL** FMRIB Software Library.

1805 **FWHM** Full Width at Half Maximum.

1806 **GM** gray-matter.

1807 **GR** gradient recalled.

1808 **HMM** hidden markov model.

1809 **HPC** high performance computing.

1810 **HRF** The hemodynamic response function (HRF) characterizes an fMRI response that results from  
1811 a brief, spatially localized pulse of neuronal activity.

1812 **HSD** honest significant difference.

1813 **INU** intensity non-uniformity.

1814 **IQR** interquartile range.

1815 **ITI** inter-trial interval.

1816 **LME** linear mixed effects.

1817 **LTS** long-term support.

1818 **MB** multi-band.

1819 **MEG** magnetoencephalography.

1820 **min** minute.

1821 **MPRAGE** Magnetization Prepared Rapid Gradient Echo.

1822 **MRI** magnetic resonance imaging.

1823 **ms** millisecond.

1824 **MTL** medial temporal lobe.

1825 **PFC** prefrontal cortex.

1826 **PMU** Physiological Measurement Unit.

1827 **ROI** region of interest.

1828 **s** second.

1829 **SEM** standard error of the mean.

1830 **SI** supplementary information.

1831 **SR** successor representation.

1832 **S-R** stimulus-response.

1833 **SRI** stimulus-response interval.

1834 **SUSAN** Smallest Univalve Segment Assimilating Nucleus.

1835 **T1w** T1-weighted.

1836 **TD** temporal difference.

1837 **TE** echo time.

1838 **TI** inversion time.

1839 **TR** repetition time.

1840 **WM** white-matter.

## 1 Supplementary Information

## 2 Supplementary Figures

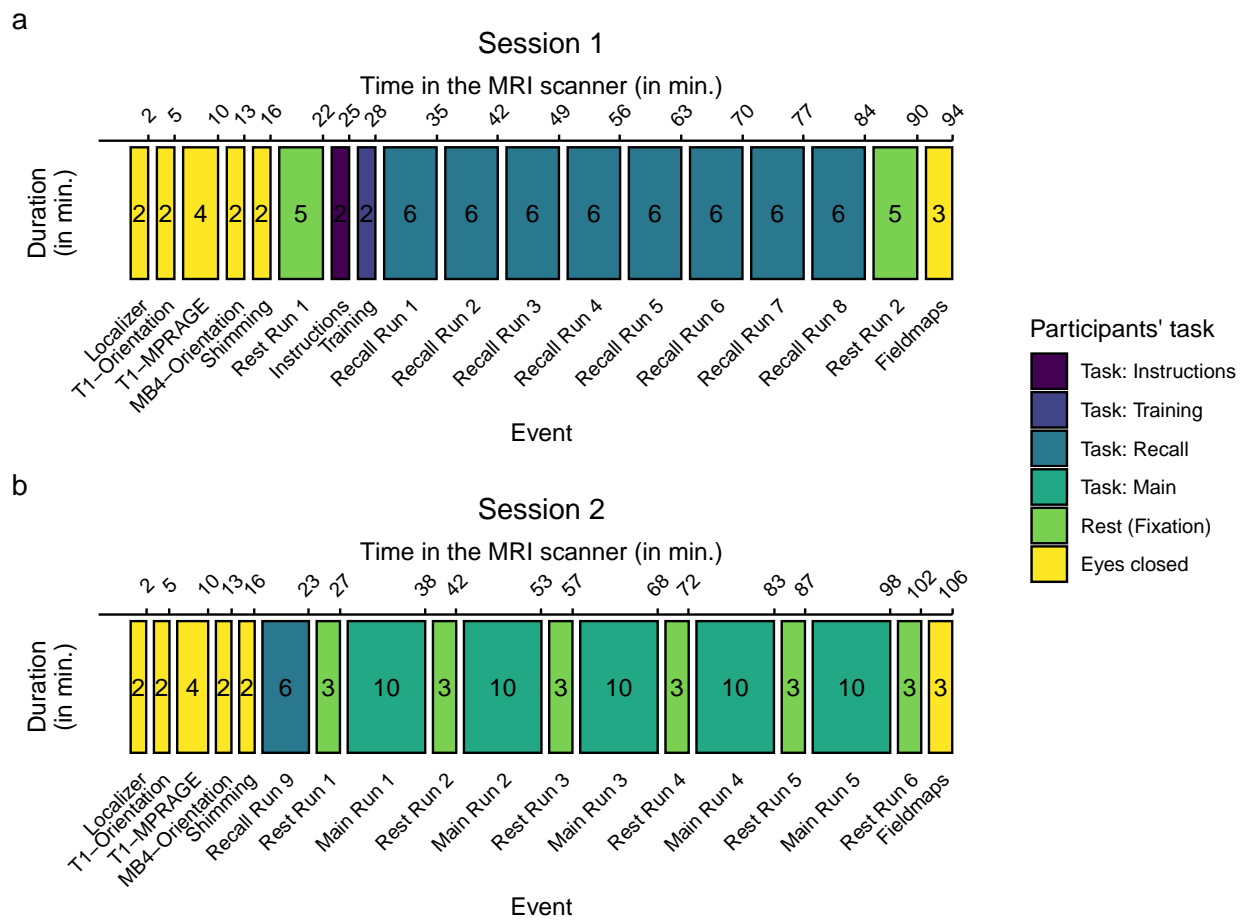

**Supplementary Figure S1: Study procedure.** (a) Session 1 started with a 5 min resting-state scan before participants read the task instructions and completed the training condition of the task. Participants then completed eight runs of the recall condition of ca. 6 min each before another 5 min resting-state scan was recorded. (b) Session 2 started with another run of the recall condition of ca. 6 min. Participants then completed all five runs of the graph learning task of about 10 min each which were interleaved with six resting-state scans of 3 min each. Both experimental sessions started with a short localizer scan and a T1w anatomical scan and ended with the acquisition of fieldmaps. During these scans and additional preparations by the study staff (e.g., orientation of the FOV) participants were asked to keep their eyes closed. Numbers inside the rectangles indicate approximate duration of each step in minutes (mins). Colors indicate participants' task (see legend).



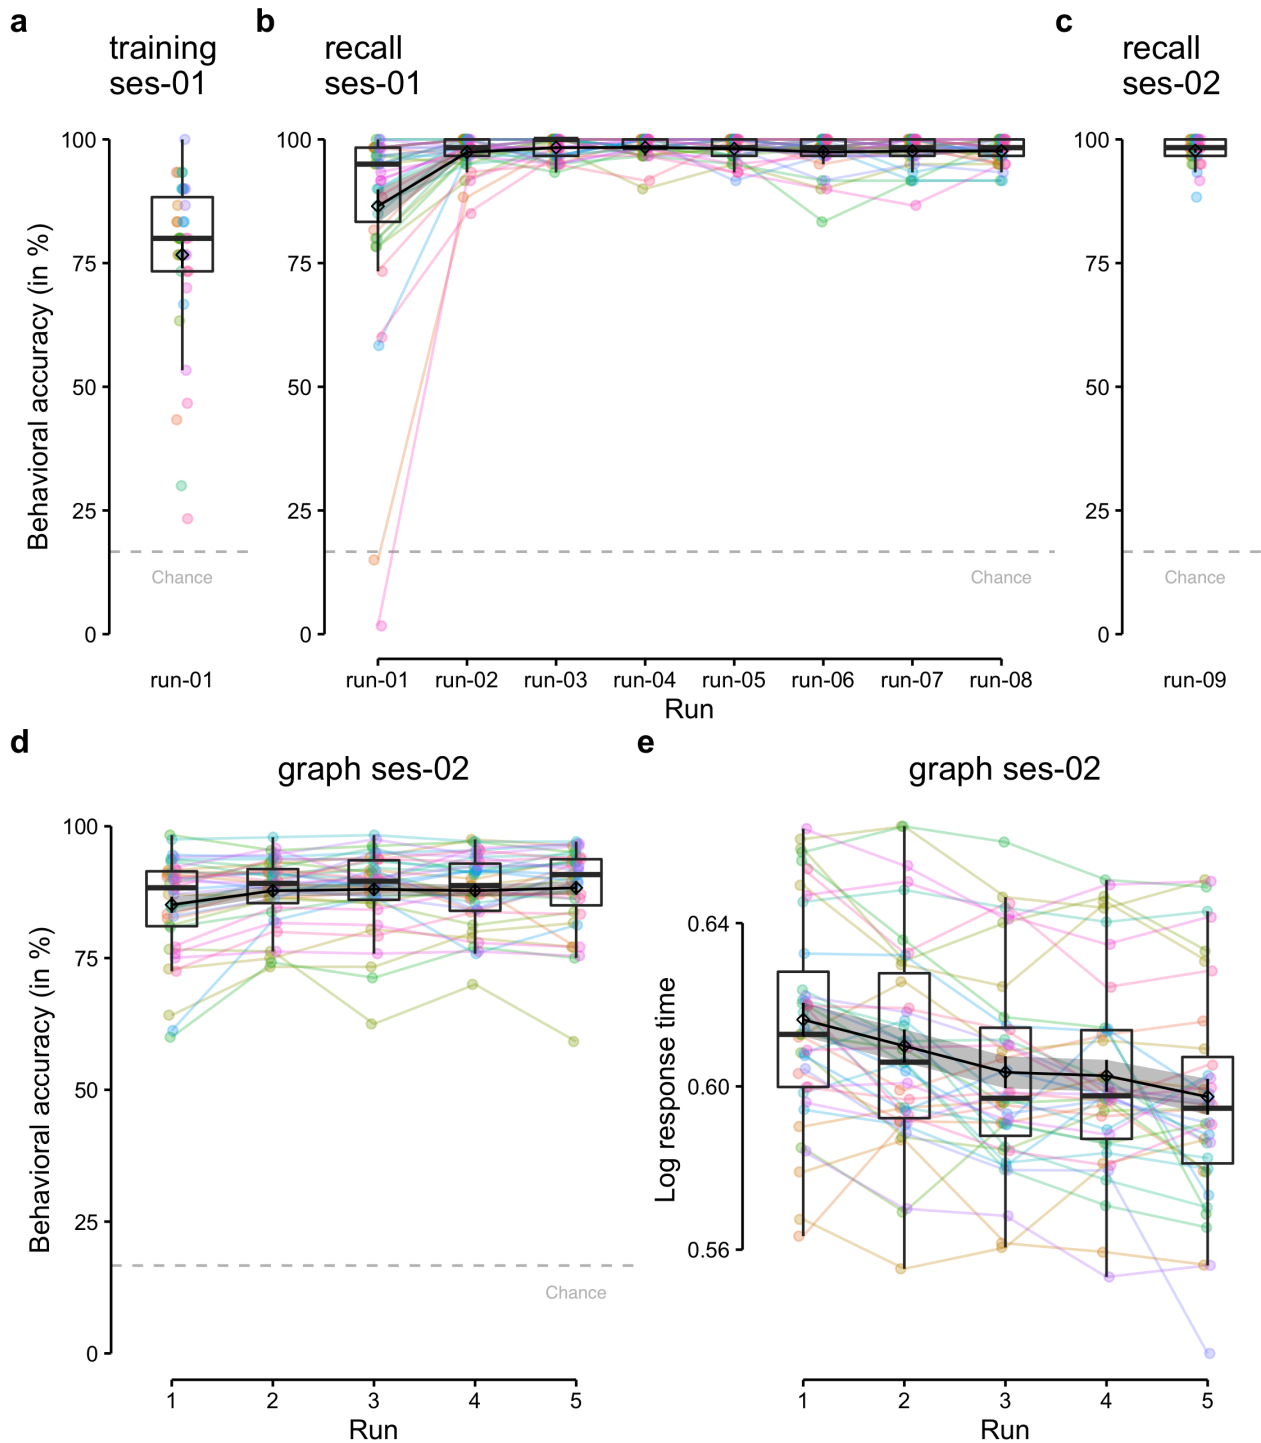

**Supplementary Figure S2: Behavioral accuracy and response times per task run in training, recall, and graph trials.** Mean behavioral accuracy (in %; y-axis) per task run of the study (x-axis) in (a) training trials, (b) recall trials in session 1, (c) recall trials in session 2, and (d) graph trials in session 2. (e) Mean log response time (y-axis) per task run of the study (x-axis) in graph trials. The chance-level (gray dashed line) is at 16.67%. Each dot corresponds to averaged data from one participant. Colored lines connect data across runs for each participant. Boxplots indicate the median and IQR. The lower and upper hinges correspond to the first and third quartiles (the 25<sup>th</sup> and 75<sup>th</sup> percentiles). The upper whisker extends from the hinge to the largest value no further than 1.5\* IQR from the hinge (where IQR is the interquartile range (IQR), or distance between the first and third quartiles). The lower whisker extends from the hinge to the smallest value at most 1.5\* IQR of the hinge. The diamond shapes show the sample mean. Error bars and shaded areas indicate  $\pm 1$  SEM. All statistics have been derived from data of  $n = 39$  human participants who participated in one experiment.

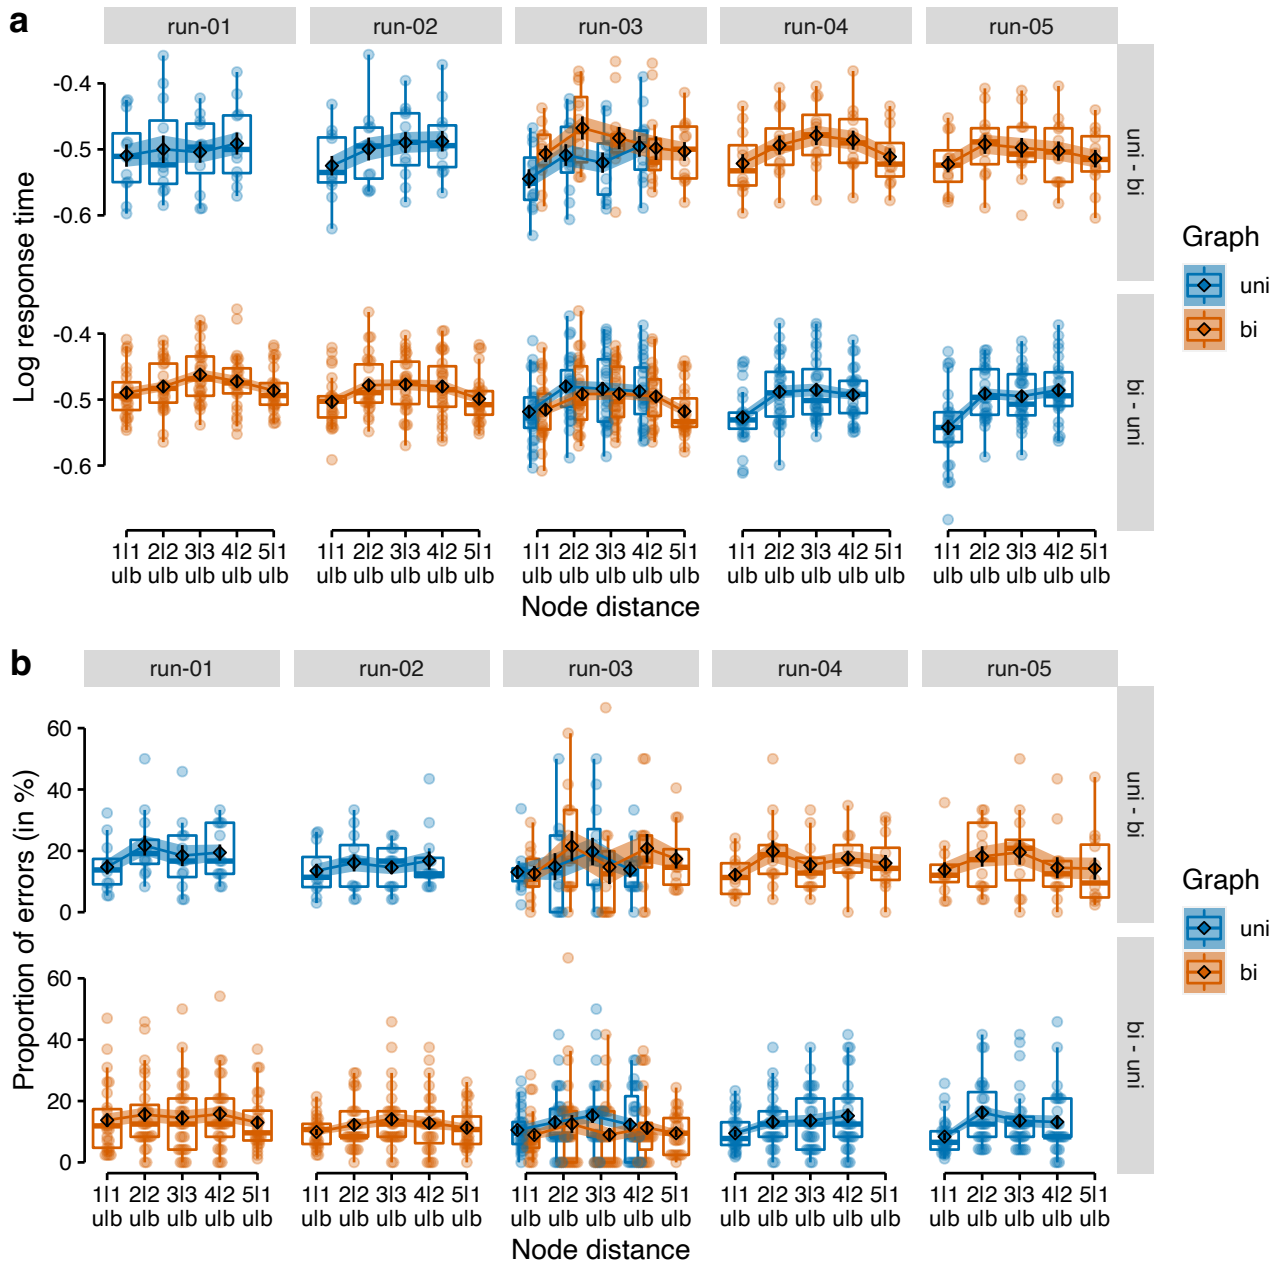

**Supplementary Figure S3: Behavioral responses across task runs.** (a) Log response times (y-axis) as a function of node distance (x-axis) in the graph structure (colors) for each task run (vertical panels) and graph order (uni - bi vs. bi - uni; horizontal panels). (b) Proportion of errors (in %; y-axis; relative to the total number of trials per node distance and run) as a function of node distance (x-axis) in the graph structure (colors) for each task run (vertical panels) and graph order (uni - bi vs. bi - uni; horizontal panels). Boxplots indicate the median and IQR. The lower and upper hinges correspond to the first and third quartiles (the 25<sup>th</sup> and 75<sup>th</sup> percentiles). The upper whisker extends from the hinge to the largest value no further than 1.5\* IQR from the hinge (where IQR is the interquartile range (IQR), or distance between the first and third quartiles). The lower whisker extends from the hinge to the smallest value at most 1.5\* IQR of the hinge. The diamond shapes show the sample mean. Each dot corresponds to averaged data from one participant. Error bars and shaded areas represent  $\pm 1$  SEM. All statistics have been derived from data of  $n = 39$  human participants who participated in one experiment.

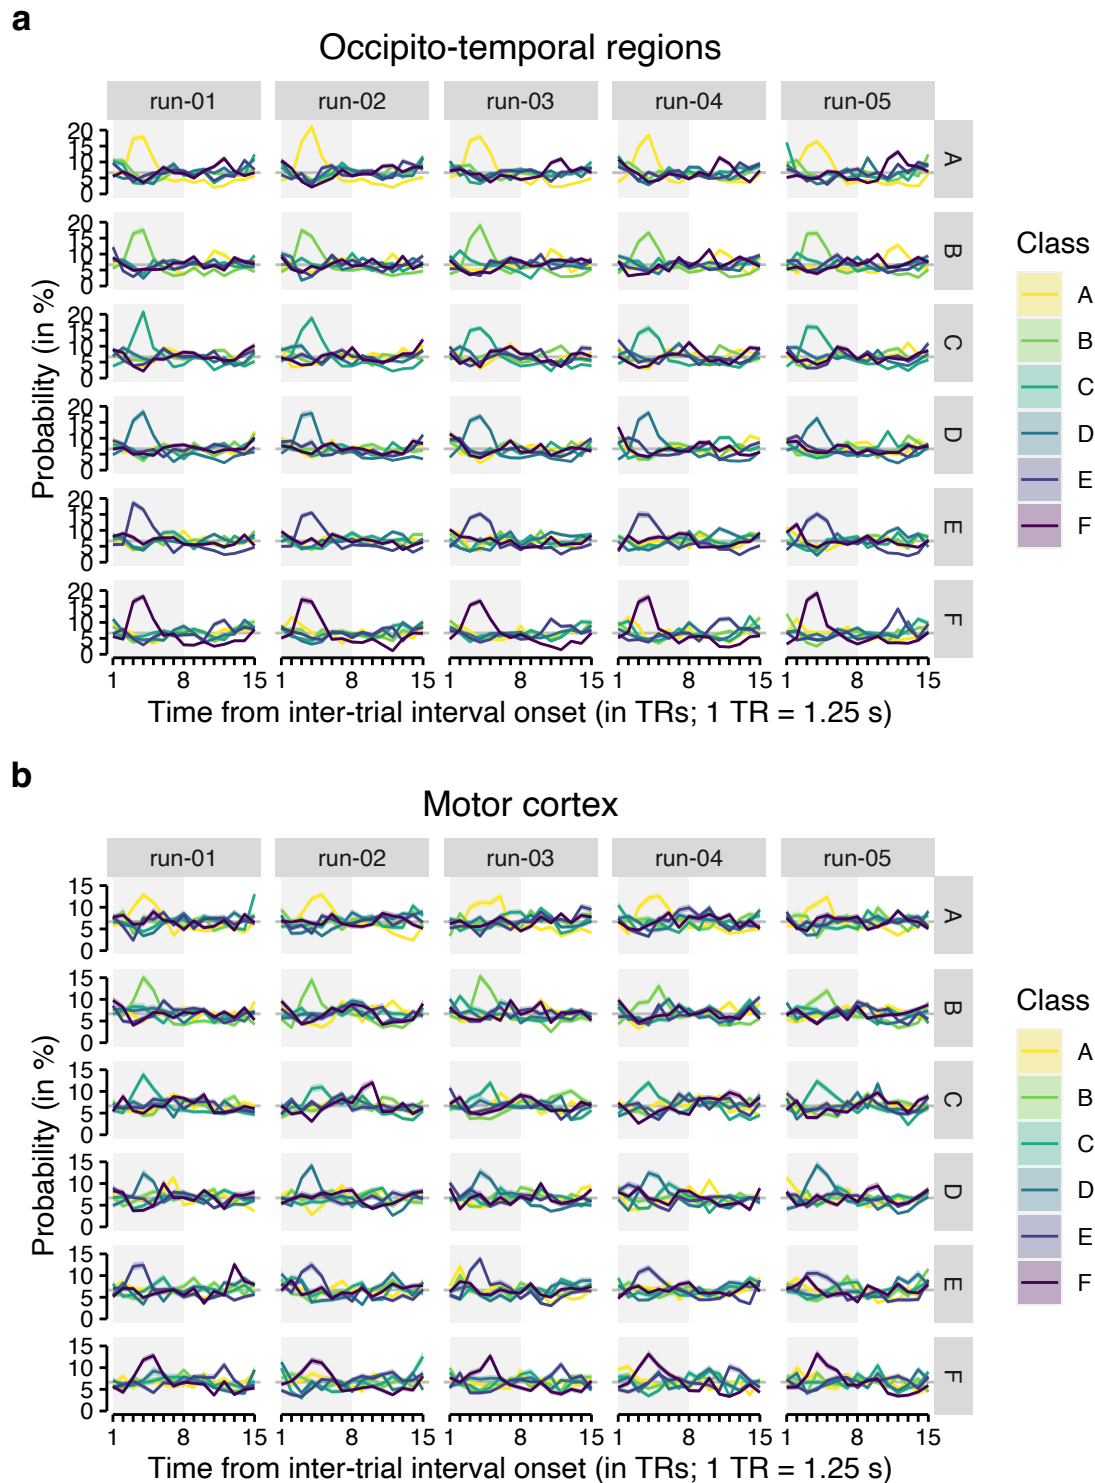

**Supplementary Figure S4: Classifier probabilities in long ITIs of graph trials.** Time courses (in TRs from the onset of the ITIs; x-axis) of classifier probabilities (in %; y-axis) per class (colors; see legend) and run (vertical panels). Substantial delayed and extended increases in classifier probability were found for the class that occurred on a given trial (horizontal panels) in both occipito-temporal brain regions (a) and motor and somatosensory cortex (b), peaking around the fourth TR following ITI onset, as expected given that classifier were trained on the fourth TR from event onset in fMRI data from recall trials. Each line represented averaged data across all trials of all participants. All shaded areas represent  $\pm 1$  SEM. Gray rectangles indicate the long ITI (TRs 1–8). All statistics have been derived from data of  $n = 39$  human participants who participated in one experiment.

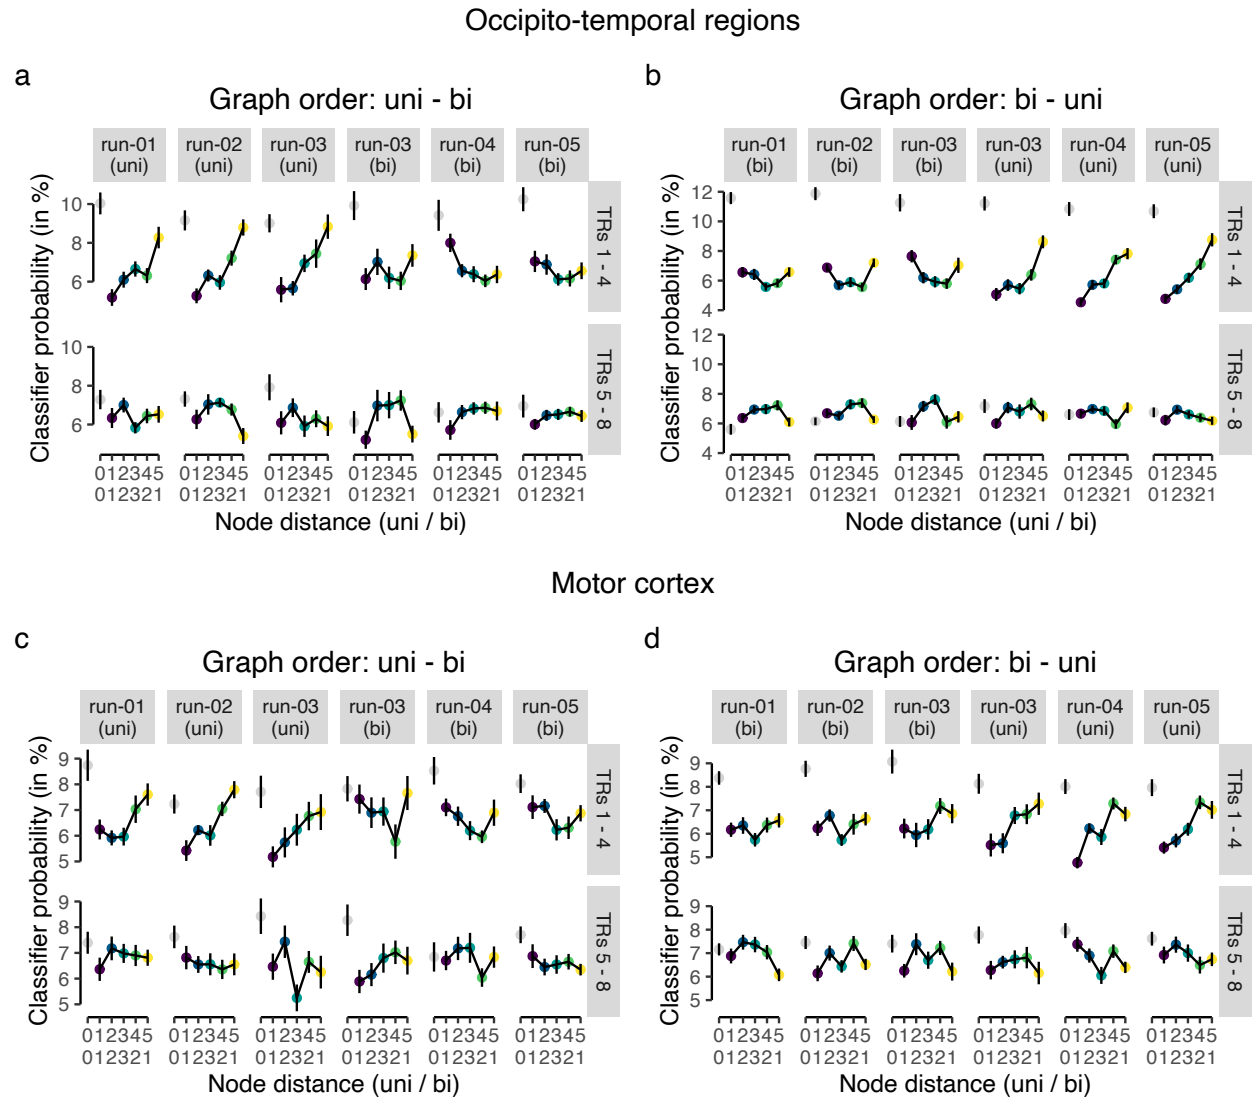

**Supplementary Figure S5: Classifier probabilities during graph trials are modulated by node distance in the graph structure.** Classifier probabilities (in %; y-axis) as a function of the distance between the nodes in the uni-directional (first line) and bi-directional (second line) graph structure averaged across TRs in the early (TRs 1–4) or late (TRs 5–8) phase (horizontal panels) of the long ITIs of the five runs (vertical panels) in graph trials for data in the occipito-temporal (a), (b) and motor cortex (c), (d) ROIs. Each dot corresponds to data averaged across participants. Error bars represent  $\pm 1$  SEM. All statistics have been derived from data of  $n = 39$  human participants who participated in one experiment.

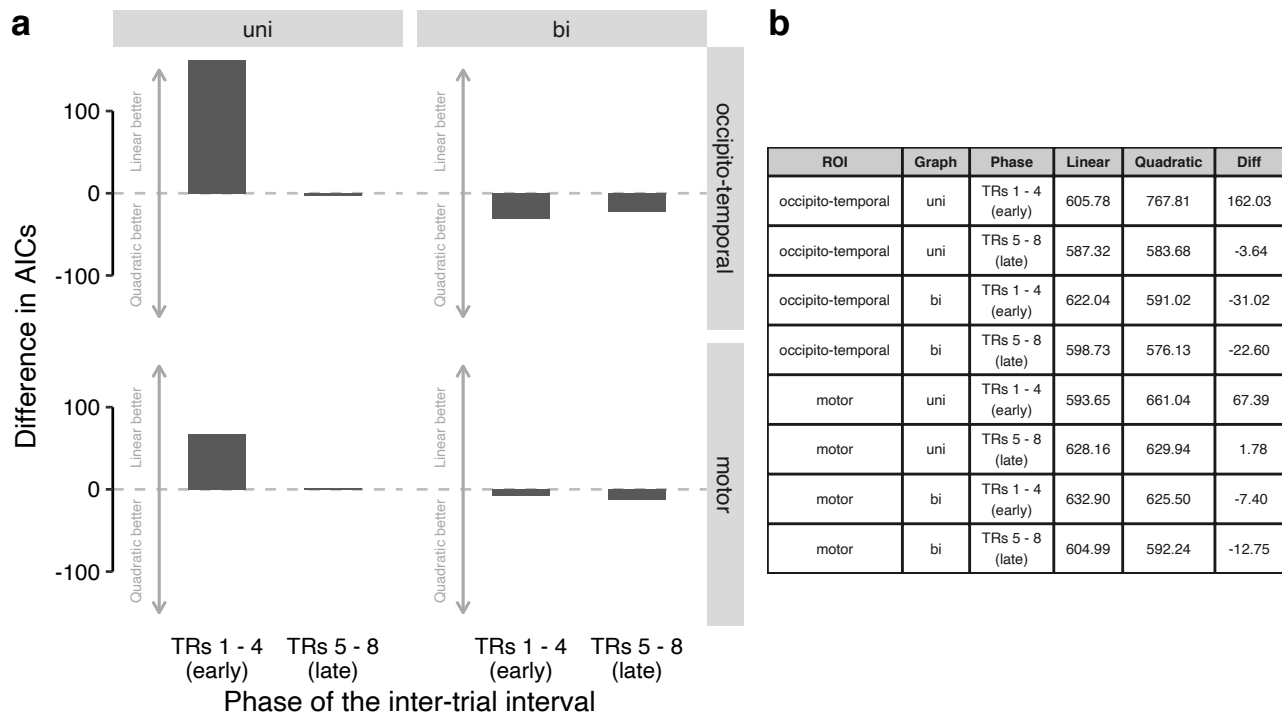

**Supplementary Figure S6: Model comparison of LME models with linear vs. quadratic predictor of classifier probabilities in ITIs of graph trials.** (a) Difference in AIC values for LME models including a linear vs. a quadratic predictor for mean classifier probabilities for the two TR phases (early vs. later), the two graph conditions (uni vs. bi; vertical panels) and the two ROIs (occipito-temporal vs. motor; horizontal panels). Positive values indicate a better fit of the LME model with the linear predictor and negative values indicate a better fit of the LME model with the quadratic predictor. (b) Table of AIC values of LME models with linear and quadratic predictor (and their difference) for all combinations of ROI, graph condition, TR phase. All statistics have been derived from data of  $n = 39$  human participants who participated in one experiment with two sessions.

### 3 Task instructions in English

Box S1: Screen 1 of instructions for the training condition in session 1

Welcome to the study - Session 1!

Please read the following information carefully. If you have any questions, you can clarify them right away with the study instructor. Please lie as still and relaxed as possible for the entire time.

Press any key to continue.

Box S2: Screen 1 of instructions for the training condition in session 1

Your task:

You are a zookeeper in training and have to make sure that all animals are in the right cages. First you will learn in a training which animal belongs in which cage. We will now explain to you exactly how this task works.

Press any key to continue.

Box S3: Screen 3 of instructions for the training condition in session 1

Training (Part 1)

You want to become a zookeeper and start your training today. First you will learn which animal belongs in which cage. You will see six cages at the bottom of the screen. Each of the six cages belongs to one of six animals. You will select a cage with the appropriate response key. Please keep your ring, middle and index fingers on the response keys the entire time so that you can answer as quickly and accurately as possible.

Press any key to continue.

Box S4: Screen 4 of instructions for the training condition in session 1

During the training, the animals appear above their cages. Press the key for that cage as fast as you can and remember the cage where the animal belongs. Please press the correct button within 1 second. Please answer as quickly and accurately as possible. You will receive feedback if your answer was correct, incorrect or too slow. The correct cage will appear in green and the incorrect cage will appear in red.

Press any key to continue.

Box S5: Screen 5 of instructions for the training condition in session 1

It is very important that you actively remember which animal belongs in which cage. You will get a higher bonus if you remember the correct assignment. The better you remember which animal belongs in which cage, the more money you earn! You will now complete one pass of this task, which will take approximately 2 minutes.

Press any key to continue.

Box S6: Screen 1 of instructions for the recall condition in session 1

Training (part 2)

We will now check how well you have learned the assignment of the animals to their cages. The animals will now appear in the center of the screen. You are asked to remember the correct cage for each animal, and then press the correct key as quickly as possible.

Press any key to continue.

Box S7: Screen 2 of instructions for the recall condition in session 1

This time you respond only after the animal is shown. In each round, the animal will appear first in the center of the screen. Then please try to actively imagine the correct combination of animal, cage and response key. After that, a small cross will appear for a short moment. Then the cages appear and you can respond as quickly and accurately as possible. Please respond as soon as the cages appear, not earlier.

Press any key to continue.

Box S8: Screen 3 of instructions for the recall condition in session 1

You have again 1 second to respond. Please respond again as fast and accurate as possible. You will get feedback again if your response was wrong or too slow. If your response was correct, you will continue directly with the next round without feedback. You will now complete 8 passes of this task, each taking about 6 minutes. In between the rounds you will be given the opportunity to take a break.

Press any key to continue.

Box S9: Screen 1 of instructions for the recall condition in session 2

Welcome to the study - Session 2!

We will check again if you can remember the assignment of the animals to their cages. The animals will appear in the center of the screen again. You are asked to remember again the correct cage for each animal and press the correct key as quickly as possible.

Press any key to continue.

Box S10: Screen 2 of instructions for the recall condition in session 2

You answer again only after the animal has been shown. In each round, the animal appears first in the center of the screen. Then please try to actively imagine the correct combination of animal, cage and answer key. After that, a small cross will first appear for a short moment.

Then the cages appear and you can answer as quickly and accurately as possible. Please respond as soon as the cages appear, not earlier.

Press any key to continue.

Box S11: Screen 3 of instructions for the recall condition in session 2

You have again 1 second to respond. Please respond again as fast and accurate as possible.

You will get feedback again if your response was wrong or too slow. If your answer was correct, you will proceed directly to the next round without feedback. You will now complete a run-through of this task, which will again take approximately 6 minutes. After the round you will be given the opportunity to take a break. Press any key to continue.

Box S12: Screen 1 of instructions for the graph condition in session 2

You have finished the passage to memory! Well done! You are now welcome to take a short break and also close your eyes. Please continue to lie still and relaxed. When you are ready, you can continue with the instructions for the main task.

Press any key to continue.

Box S13: Screen 2 of instructions for the graph condition in session 2

Main task

Congratulations, you are now a trained zookeeper! Attention: Sometimes the animals break out of their cages! Your task is to bring the animals back to the right cages. When you see an animal on the screen, press the right button as fast as possible to bring the animal back to the right cage. This time you will not get any feedback if your answer was right or wrong. The more animals you put in the correct cages, the more bonus you get at the end of the trial!

The main task consists of 5 runs, each taking about 10 minutes to complete.

Press any key to continue.

Box S14: Screen 3 of instructions for the graph condition in session 2

You have again 1 second to respond. In the main task, you again respond immediately when you see an animal on the screen. Again, please respond as quickly and accurately as possible.

Between each round you will again see a cross for a moment. Sometimes the cross will be shown a little shorter and sometimes a little longer. It is best to stand by all the time to respond as quickly as possible to the next animal.

Press any key to continue.



Box S15: Screen 4 of instructions for the graph condition in session 2

Resting phases

After all the work as a zookeeper you also need rest. Before, between and after the main task we will take some measurements during which you should just lie still. During these rest periods, please keep your eyes open and look at a cross the entire time. Blinking briefly is perfectly fine. The background of the screen will be dark during the resting phases. Please continue to lie very still and relaxed and continue to try to move as little as possible. Please

try to stay awake the entire time.

Please wait for the study instructor.

#### 4 Task instructions in German

##### Box S16: Screen 1 of instructions for the training condition in session 1

Willkommen zur Studie - Sitzung 1!

Bitte lesen Sie sich die folgenden Informationen aufmerksam durch. Falls Sie Fragen haben, können Sie diese gleich mit der Versuchsleitung klären. Bitte liegen Sie die gesamte Zeit so ruhig und entspannt wie möglich.

Drücken Sie eine beliebige Taste, um fortzufahren.

##### Box S17: Screen 2 of instructions for the training condition in session 1

Ihre Aufgabe:

Sie sind ein\*e Zoowärter\*in in Ausbildung und sollen darauf achten, dass alle Tiere in den richtigen Käfigen sind. Zuerst werden Sie in einem Training lernen, welches Tier in welchen Käfig gehört. Wir werden Ihnen jetzt genau erklären, wie diese Aufgabe funktioniert.

Drücken Sie eine beliebige Taste, um fortzufahren.

##### Box S18: Screen 3 of instructions for the training condition in session 1

Training (Teil 1)

Sie wollen Zoowärter\*in werden und beginnen heute Ihre Ausbildung. Zuerst lernen Sie, welches Tier in welchen Käfig gehört. Sie werden gleich sechs Käfige im unteren Teil des Bildschirms sehen. Jeder der sechs Käfige gehört zu einem von sechs Tieren. Sie wählen einen Käfig mit der entsprechenden Antworttaste aus. Bitte lassen Sie Ihre Ring-, Mittel- und Zeigefinger die gesamte Zeit auf den Antworttasten, damit Sie so schnell und genau wie möglich antworten können.

Drücken Sie eine beliebige Taste, um fortzufahren.

##### Box S19: Screen 4 of instructions for the training condition in session 1

Während des Trainings erscheinen die Tiere über ihren Käfigen. Drücken Sie die Taste für diesen Käfig so schnell wie möglich und merken Sie sich den Käfig, in den das Tier gehört. Bitte drücken Sie die richtige Taste innerhalb von 1 Sekunde. Bitte antworten Sie so schnell und genau wie möglich. Sie erhalten eine Rückmeldung, wenn Ihre Antwort richtig, falsch oder zu langsam war. Dabei erscheint der richtige Käfig in Grün und der falsche Käfig in Rot.

Drücken Sie eine beliebige Taste, um fortzufahren.

Box S20: Screen 5 of instructions for the training condition in session 1

Es ist sehr wichtig, dass Sie sich aktiv merken, welches Tier in welchen Käfig gehört. Sie erhalten einen höheren Bonus, wenn Sie sich an die richtige Zuordnung erinnern. Je besser Sie sich daran erinnern, in welchen Käfig welches Tier gehört, desto mehr Geld verdienen Sie! Sie werden nun einen Durchgang dieser Aufgabe absolvieren, der circa 2 Minuten dauert.  
Drücken Sie eine beliebige Taste, um fortzufahren.

Box S21: Screen 1 of instructions for the recall condition in session 1

Training (Teil 2)

Wir werden nun überprüfen, wie gut Sie die Zuordnung der Tiere zu ihren Käfigen gelernt haben. Die Tiere werden nun in der Mitte des Bildschirms erscheinen. Sie sollen sich an den richtigen Käfig für jedes Tier erinnern und dann die richtige Taste so schnell wie möglich drücken.  
Drücken Sie eine beliebige Taste, um fortzufahren.

Box S22: Screen 2 of instructions for the recall condition in session 1

Dieses Mal antworten Sie erst nachdem das Tier gezeigt wurde. In jeder Runde erscheint zuerst das Tier in der Mitte des Bildschirms. Versuchen Sie dann bitte, sich die richtige Kombination von Tier, Käfig und Antworttaste aktiv vorzustellen. Danach erscheint zunächst ein kleines Kreuz für einen kurzen Moment. Dann erscheinen die Käfige und Sie können so schnell und genau wie möglich antworten. Bitte antworten Sie erst sobald die Käfige erscheinen, nicht früher.  
Drücken Sie eine beliebige Taste, um fortzufahren.

Box S23: Screen 3 of instructions for the recall condition in session 1

Sie haben wieder 1 Sekunde Zeit zu antworten. Bitte antworten Sie wieder so schnell und genau wie möglich. Sie erhalten wieder eine Rückmeldung, wenn Ihre Antwort falsch oder zu langsam war. Wenn Ihre Antwort richtig war, geht es ohne Rückmeldung direkt mit der nächsten Runde weiter. Sie werden nun 8 Durchgänge dieser Aufgabe absolvieren, die jeweils circa 6 Minuten dauern. Zwischen den Durchgängen werden Sie die Möglichkeit bekommen, eine Pause zu machen.  
Drücken Sie eine beliebige Taste, um fortzufahren.

Box S24: Screen 1 of instructions for the recall condition in session 2

Willkommen zur Studie - Sitzung 2!

Wir werden noch einmal überprüfen, ob Sie sich an die Zuordnung der Tiere zu ihren Käfigen erinnern können. Die Tiere werden wieder in der Mitte des Bildschirms erscheinen. Sie sollen sich wieder an den richtigen Käfig für jedes Tier erinnern und die richtige Taste so schnell wie möglich drücken.  
Drücken Sie eine beliebige Taste, um fortzufahren.

Box S25: Screen 2 of instructions for the recall condition in session 2

Sie antworten wieder erst nachdem das Tier gezeigt wurde. In jeder Runde erscheint zuerst das Tier in der Mitte des Bildschirms. Versuchen Sie dann bitte, sich die richtige Kombination von Tier, Käfig und Antworttaste aktiv vorzustellen. Danach erscheint zunächst ein kleines Kreuz für einen kurzen Moment. Dann erscheinen die Käfige und Sie können so schnell und genau wie möglich antworten. Bitte antworten Sie erst sobald die Käfige erscheinen, nicht früher.

Drücken Sie eine beliebige Taste, um fortzufahren.

Box S26: Screen 3 of instructions for the recall condition in session 2

Sie haben wieder 1 Sekunde Zeit zu antworten. Bitte antworten Sie wieder so schnell und genau wie möglich. Sie erhalten wieder eine Rückmeldung, wenn Ihre Antwort falsch oder zu langsam war. Wenn Ihre Antwort richtig war, geht es ohne Rückmeldung direkt mit der nächsten Runde weiter. Sie werden nun einen Durchgang dieser Aufgabe absolvieren, der wieder circa 6 Minuten dauert. Nach dem Durchgang werden Sie die Möglichkeit bekommen, eine Pause zu machen.

Drücken Sie eine beliebige Taste, um fortzufahren.

Box S27: Screen 1 of instructions for the graph condition in session 2

Sie haben den Durchgang zu Erinnerung beendet! Gut gemacht! Sie können jetzt gerne eine kurze Pause machen und dabei auch Ihre Augen schließen. Bitte bleiben Sie weiterhin ruhig und entspannt liegen. Wenn Sie bereit sind, können Sie mit den Instruktionen für die Hauptaufgabe fortfahren.

Drücken Sie eine beliebige Taste, um fortzufahren.

Box S28: Screen 2 of instructions for the graph condition in session 2

Hauptaufgabe

Herzlichen Glückwunsch, Sie sind nun ausgebildete\*r Zoowärter\*in! Achtung: Manchmal brechen die Tiere aus ihren Käfigen aus! Ihre Aufgabe ist es, die Tiere wieder in die richtigen Käfige zu bringen. Wenn Sie ein Tier auf dem Bildschirm sehen, drücken Sie so schnell wie möglich die richtige Taste, um das Tier zurück in den richtigen Käfig zu bringen. Dieses Mal bekommen Sie keine Rückmeldung, ob Ihre Antwort richtig oder falsch war. Je mehr Tiere Sie in die richtigen Käfige bringen, desto mehr Bonus bekommen Sie am Ende der Studie! Die Hauptaufgabe besteht aus 5 Durchgängen, die jeweils circa 10 Minuten dauern.

Drücken Sie eine beliebige Taste, um fortzufahren.

Box S29: Screen 3 of instructions for the graph condition in session 2

Sie haben wieder 1 Sekunde Zeit zu antworten. In der Hauptaufgabe antworten Sie wieder sofort, wenn Sie ein Tier auf dem Bildschirm sehen. Bitte antworten Sie wieder so schnell und genau wie möglich. Zwischen den einzelnen Runden sehen Sie wieder ein Kreuz für einen Moment. Manchmal wird das Kreuz etwas kürzer und manchmal etwas länger gezeigt. Am Besten halten Sie sich die ganze Zeit bereit, um so schnell wie möglich auf das nächste Tier zu reagieren.

Drücken Sie eine beliebige Taste, um fortzufahren.

Box S30: Screen 4 of instructions for the graph condition in session 2

Ruhephasen

Nach der ganzen Arbeit als Zoowärter\*in braucht man auch Erholung. Vor, zwischen und nach den Durchgängen der Hauptaufgabe machen wir einige Messungen bei denen Sie einfach nur ruhig liegen sollen. In diesen Ruhephasen sollen Sie bitte Ihre Augen geöffnet halten und die gesamte Zeit auf ein Kreuz schauen. Kurzes Blinzeln ist vollkommen in Ordnung. Der Hintergrund des Bildschirms wird in den Ruhephasen dunkel sein. Bitte liegen Sie weiterhin ganz ruhig und entspannt und versuchen Sie weiterhin sich so wenig wie möglich zu bewegen.

Versuchen Sie bitte die gesamte Zeit wach zu bleiben.

Bitte warten Sie auf die Versuchsleitung.
